# Supplementary material for: Techno-economic analysis and life cycle assessment for catalytic fast pyrolysis of mixed plastic waste
Source: Royal Society of Chemistry journal article supplement (doi:10.1039/d3ee00749a), 2023-01-01
Supplement: d3ee00749a1.pdf [file d3ee00749a1.pdf]

## Electronic Supplementary Information

### **Techno-economic analysis and life cycle assessment for catalytic fast pyrolysis of mixed plastic waste**

Geetanjali Yadav,<sup>a,b</sup> Avantika Singh,<sup>a,b,\*</sup> Abhijit Dutta,<sup>a</sup> Taylor Uekert,<sup>b,c</sup> Jason S. DesVeaux,<sup>a,b</sup> Scott R. Nicholson,<sup>b,c</sup> Eric C.D. Tan,<sup>a</sup> Calvin Mukarakate,<sup>a</sup> Joshua A. Schaidle,<sup>a</sup> Cody J. Wrasman,<sup>a</sup> Alberta Carpenter,<sup>b,c</sup> Robert M. Baldwin,<sup>b,d</sup> Yuriy Roman-Leshkov,<sup>b,e</sup> and Gregg T. Beckham<sup>b,d,\*</sup>

<sup>a</sup> *Catalytic Carbon Transformation and Scale-Up Center, National Renewable Energy Laboratory, Golden, CO, 80401, USA*

<sup>b</sup> *BOTTLE Consortium, Golden, CO, USA*

<sup>c</sup> *Strategic Energy Analysis Center, National Renewable Energy Laboratory, Golden, CO, 80401, USA*

<sup>d</sup> *Renewable Resources and Enabling Sciences Center, National Renewable Energy Laboratory, Golden, CO, 80401, USA*

<sup>e</sup> *Department of Chemical Engineering, Massachusetts Institute of Technology, Cambridge, MA, 02142, USA*

\* Email: [gregg.beckham@nrel.gov](mailto:gregg.beckham@nrel.gov); [avantika.nrel@outlook.com](mailto:avantika.nrel@outlook.com)

† Electronic Supplementary Information (ESI) available.

## Supplemental Items

|                                                                                                                                                                                                                                                                           |       |
|---------------------------------------------------------------------------------------------------------------------------------------------------------------------------------------------------------------------------------------------------------------------------|-------|
| List of abbreviations                                                                                                                                                                                                                                                     | 4     |
| <b>Part I - Supporting figures</b>                                                                                                                                                                                                                                        | 5     |
| Figure S1. Detailed PFD of feedstock pre-processing and catalytic fast pyrolysis process sections (base case)                                                                                                                                                             | 5-6   |
| Figure S2. Detailed PFD of pyrolysis phase separation into liquid and gaseous stream rich in aromatics and olefins, respectively (base case)                                                                                                                              | 7-8   |
| Figure S3. Detailed PFD of recovery of olefins from the gaseous stream of the pyrolysis effluent (base case)                                                                                                                                                              | 9-10  |
| Figure S4. Detailed PFD of the aromatic hydrocarbons recovery process section (base case)                                                                                                                                                                                 | 11-12 |
| Figure S5. Operating expense breakdown by process area (Case B – mixed product)                                                                                                                                                                                           | 13    |
| Figure S6. MSP of BTX product as a function of feedstock cost, which is the total of the costs for plastic bales and flakes.                                                                                                                                              | 13    |
| Figure S7. Example of how product pricing values were determined based on an assumed WTI crude oil price                                                                                                                                                                  | 14    |
| Figure S8. Trends of price change of product and different co-products in this study vis-à-vis WTI crude oil price                                                                                                                                                        | 15    |
| Figure S9. Comparison of GHG emissions from the catalytic fast pyrolysis of mixed plastic wastes by MFI and LCA tool for Case A–naphtha product, Case B–mixed product, Case C–aromatics-rich product, and Case D–olefins-rich product                                     | 16    |
| Figure S10. MFI, LCA, and TEA system boundaries for the four catalytic fast pyrolysis-based mixed plastic waste recycling scenarios, as well as for the corresponding virgin materials (naphtha in Case A, BTX aromatics in Cases B & C, and ethylene monomer in Case D). | 17    |
| <b>Part II - Supporting tables</b>                                                                                                                                                                                                                                        | 18    |
| Table S1. Feedstock composition                                                                                                                                                                                                                                           | 18    |
| Table S2. Financial parameters used in discounted cash flow rate of return (DCFROR) analysis                                                                                                                                                                              | 18    |
| Table S3. Economic summary for naphtha production (Case A – naphtha product)                                                                                                                                                                                              | 19    |
| Table S4. Capital investment breakdown by process sections for the Case B – mixed product (base case). All costs are in USD                                                                                                                                               | 20-23 |
| Table S5. CAPEX breakdown for the base case, related to Figure 4a from main text                                                                                                                                                                                          | 24    |
| Table S6. Cost factors for indirect costs                                                                                                                                                                                                                                 | 24    |
| Table S7. Annual operating cost by process section for the base case, related to Figure 4b in the main text                                                                                                                                                               | 25    |
| Table S8. Basis of product and co-product’s application, annual global consumption (in million metric tons), and pricing                                                                                                                                                  | 26    |
| Table S9. Economic summary for BTX aromatics production in the base case (Case B – mixed product)                                                                                                                                                                         | 27    |
| Table S10. Salary cost for plant employees                                                                                                                                                                                                                                | 28    |
| Table S11. Fixed operating costs                                                                                                                                                                                                                                          | 28    |
| Table S12. Operating costs and summary of variable operating cost additions                                                                                                                                                                                               | 29    |
| Table S13. Simplified breakdown of the MSP of BTX in the base case (Case B – mixed product), related to Figure 4c in the main text                                                                                                                                        | 29    |
| Table S14. Minimum selling price of BTX by process section for the base case (Case B – mixed product), related to Figure 4c                                                                                                                                               | 30    |
| Table S15. Rationale for choosing the low and high values for the univariate sensitivity analysis, related to Figure 5a in the main text                                                                                                                                  | 31-32 |
| Table S16. Sensitivity results for change to MSP BTX aromatics, related to Figure 5a                                                                                                                                                                                      | 32    |
| Table S17. Economic summary for BTX aromatics production (Case C – aromatics-rich product)                                                                                                                                                                                | 33    |

|                                                                                                                                                                                                                                                                                   |       |
|-----------------------------------------------------------------------------------------------------------------------------------------------------------------------------------------------------------------------------------------------------------------------------------|-------|
| Table S18. Economic summary for ethylene production (Case D – olefins rich product)                                                                                                                                                                                               | 34    |
| Table S19. MFI results on supply chain energy and GHG emissions for Case A–naphtha product, related to Figure 6b and Figure 6c in the main text                                                                                                                                   | 35    |
| Table S20. MFI results on supply chain energy and GHG emissions for Case B–mixed product (base case), related to Figure 6b and Figure 6c in the main text                                                                                                                         | 35    |
| Table S21. MFI results on supply chain energy and GHG emissions for Case C–aromatics-rich product, related to Figure 6b and Figure 6c in the main text                                                                                                                            | 36    |
| Table S22. MFI Results on supply chain energy and GHG emissions for Case D–olefins-rich product, related to Figure 6b-c in the main text                                                                                                                                          | 36    |
| Table S23. Life cycle assessment results for Case A – naphtha product in which pyrolysis of mixed plastic waste is used to produce naphtha, related to Figure 7a-b in the main text                                                                                               | 37    |
| Table S24. Life cycle assessment results for Case B – mixed product in which pyrolysis of mixed plastic waste is used to produce a benzene, toluene, and xylene mixture (BTX), related to Figure 7c-d in the main text                                                            | 38    |
| Table S25. Life cycle assessment results for Case C–aromatics-rich product in which pyrolysis of mixed plastic waste is used to produce a benzene, toluene, and xylene mixture (BTX) under a high selectivity towards aromatics scenario, related to Figure 7e-f in the main text | 39    |
| Table S26. Life cycle assessment results for Case D–olefins-rich product in which pyrolysis of mixed plastic waste is used to produce ethylene under a high selectivity towards olefins scenario, related to Figure 7g-h in the main text                                         | 40    |
| <b>Part III – Supplemental methods and materials</b>                                                                                                                                                                                                                              | 41-46 |
| Table S27. Estimation of catalyst cost by CapEx & OpEx Factors method using the CatCost tool                                                                                                                                                                                      | 47-48 |
| Supplemental references                                                                                                                                                                                                                                                           | 48-49 |

## **Lists of abbreviations:**

- ACCE: Aspen Capital Cost Estimator
- AWARE: Available WATER REmaining
- BAHX: Brazed Aluminum Heat Exchanger
- BTG-BTL: Biomass Techno
- BTX: Benzene, Toluene, Xylene
- CFP: Catalytic Fast Pyrolysis
- C/F ratio: Catalyst-to-feed ratio
- DMF: Dimethylformamide
- ED: Extractive distillation
- EIA: Environmental Protection Agency
- ESI: Electronic Supplementary Information
- EXP: Expander
- FCC: Fluid Catalytic Cracking
- GHG: Greenhouse Gas
- HC: Hydrocarbon
- HDPE: High-Density Polyethylene
- IRR: Internal Rate of Return
- KO drum: Knock-out drum
- LCA: Life cycle assessment
- LDPE: Low-Density Polyethylene
- LHV: Lower Heating Value
- LLDPE: Linear Low-Density Polyethylene
- MEA: Monoethanolamine
- MFI: Materials Flows Through Industry
- MITA: Minimum Temperature Approach
- MPW: Mixed Plastic Waste
- MRF: Materials Recovery Facility
- MSP: Minimum Selling Price
- MSW: Municipal Solid Waste
- NGLs: Natural Gas Liquids
- NIST-TDE: National Institute of Science and Technology ThermoDataEngine
- NMP: N-formylmorpholine
- NPV: Net Present Value
- NREL – National Renewable Energy Laboratory
- NRTL-RK – Nonrandom Two-Liquid-Redlich-Kwong
- OSBL: Outside Battery Limits
- PET: Poly(ethylene terephthalate)
- PFD: Process Flow Diagram
- PP: Polypropylene
- PS: Polystyrene
- PVC: Poly(vinyl chloride)
- RFO: Renewable Fuel Oil
- RTP: Rapid Thermal Processing
- TEA: Techno-economic Assessment
- TPD: Tonnes Per Day
- TRL: Technology Readiness Level
- TRACI: Tool for the Reduction and Assessment of Chemicals and Other Environmental Impacts
- UNIQUAC: Universal Quasichemical
- USD: United States Dollars
- WTI: West Texas Intermediate

## A. Supporting figures

Base case model construction: Process flow diagrams (PFDs)

### a. Process area's: Feedstock Pretreatment and Catalytic Fast Pyrolysis

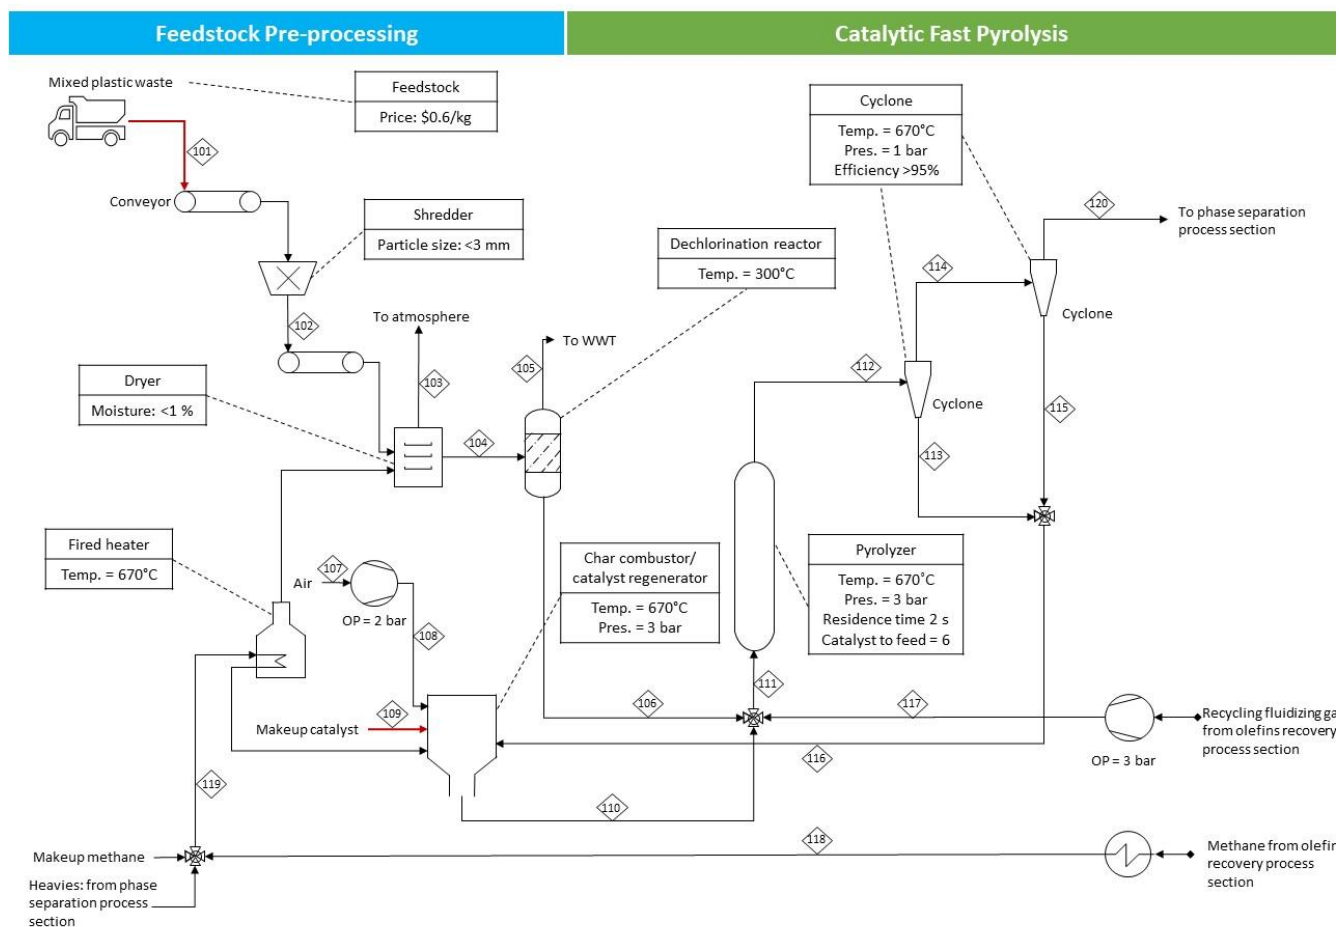

**Fig. S1.** Detailed PFD of feedstock pre-processing and catalytic fast pyrolysis process sections (base case). Mixed plastic wastes and other raw inputs are shown in red; intermediate, recycle, and waste streams are shown in black.

## Streams composition

| Components         | Units | 101   | 102   | 103    | 104   | 105  | 106  | 107    | 108    | 109 | 110   | 111    | 112    | 113 | 114    | 115  | 116  | 117   | 118  | 119   | 120    |
|--------------------|-------|-------|-------|--------|-------|------|------|--------|--------|-----|-------|--------|--------|-----|--------|------|------|-------|------|-------|--------|
| <b>Total Flow</b>  | kg/hr | 10000 | 10000 | 21315  | 10000 | 724  | 9783 | 19872  | 19872  | 272 | 58305 | 75709  | 75709  | 296 | 17401  | 3    | 299  | 7621  | 223  | 872   | 17103  |
| <b>Volume Flow</b> | l/min | 186   | 186   | 328090 | 186   | 2693 | 323  | 287183 | 188813 | 0.8 | 159   | 554103 | 560992 | 2   | 557216 | 0.02 | 2.25 | 15626 | 1613 | 12011 | 475451 |
| <b>Temperature</b> | °C    | 25    | 25    | 50     | 100   | 300  | 301  | 32.2   | 123    | 16  | 16    | 670    | 670    | 670 | 670    | 670  | 670  | 670   | 12   | 240   | 670    |
| <b>Pressure</b>    | bar   | 1     | 1     | 1      | 1     | 1    | 3    | 1      | 2      | 2   | 2     | 3      | 1      | 1   | 1      | 1    | 1    | 3     | 5    | 1     | 1      |
| <b>LDPE</b>        | kg/hr | 2100  | 2100  | 0      | 2100  | 0    | 2100 | 0      | 0      | 0   | 0     | 2100   | 0      | 0   | 0      | 0    | 0    | 0     | 0    | 0     | 0      |
| <b>HDPE</b>        | kg/hr | 1900  | 1900  | 0      | 1900  | 0    | 1900 | 0      | 0      | 0   | 0     | 1900   | 0      | 0   | 0      | 0    | 0    | 0     | 0    | 0     | 0      |
| <b>PP</b>          | kg/hr | 2400  | 2400  | 0      | 2400  | 0    | 2400 | 0      | 0      | 0   | 0     | 2400   | 0      | 0   | 0      | 0    | 0    | 0     | 0    | 0     | 0      |
| <b>PS</b>          | kg/hr | 1100  | 1100  | 0      | 1100  | 0    | 1100 | 0      | 0      | 0   | 0     | 1100   | 0      | 0   | 0      | 0    | 0    | 0     | 0    | 0     | 0      |
| <b>LLDPE</b>       | kg/hr | 1800  | 1800  | 0      | 1800  | 0    | 1800 | 0      | 0      | 0   | 0     | 1800   | 0      | 0   | 0      | 0    | 0    | 0     | 0    | 0     | 0      |
| <b>PET</b>         | kg/hr | 300   | 300   | 0      | 300   | 0    | 300  | 0      | 0      | 0   | 0     | 300    | 0      | 0   | 0      | 0    | 0    | 0     | 0    | 0     | 0      |
| <b>PVC</b>         | kg/hr | 400   | 400   | 0      | 400   | 0    | 8    | 0      | 0      | 0   | 0     | 8      | 0      | 0   | 0      | 0    | 0    | 0     | 0    | 0     | 0      |
| <b>Benzene</b>     | kg/hr | 0     | 0     | 0      | 0     | 0    | 163  | 0      | 0      | 0   | 0     | 163    | 0      | 0   | 0      | 0    | 0    | 0     | 0    | 0     | 0      |
| <b>Water</b>       | kg/hr | 0     | 0     | 1635   | 0     | 507  | 0    | 0      | 0      | 0   | 0     | 0      | 0      | 0   | 0      | 0    | 0    | 0     | 0    | 0     | 0      |
| <b>HCl</b>         | kg/hr | 0     | 0     | 0      | 0     | 217  | 11   | 0      | 0      | 0   | 0     | 0      | 0      | 0   | 0      | 0    | 0    | 0     | 0    | 0     | 0      |
| <b>Catalyst</b>    | kg/hr | 0     | 0     | 0      | 0     | 0    | 0    | 0      | 0      | 0   | 58305 | 58305  | 58305  | 0   | 0      | 0    | 0    | 0     | 0    | 0     | 0      |
| <b>Air</b>         | kg/hr | 0     | 0     | 0      | 0     | 0    | 0    | 19872  | 19872  | 0   | 0     | 0      | 0      | 0   | 0      | 0    | 0    | 0     | 0    | 0     | 0      |
| <b>H2</b>          | kg/hr | 0     | 0     | 0      | 0     | 0    | 0    | 0      | 0      | 0   | 24    | 38     | 38     | 0   | 14     | 0    | 0    | 24    | 14   | 14    | 38     |
| <b>CH4</b>         | kg/hr | 0     | 0     | 0      | 0     | 0    | 0    | 0      | 0      | 272 | 259   | 405    | 405    | 0   | 149    | 0    | 0    | 258   | 148  | 146   | 405    |
| <b>C2H6</b>        | kg/hr | 0     | 0     | 0      | 0     | 0    | 0    | 0      | 0      | 0   | 158   | 248    | 248    | 0   | 92     | 0    | 0    | 158   | 0.02 | 0.023 | 248    |
| <b>C3H8</b>        | kg/hr | 0     | 0     | 0      | 0     | 0    | 0    | 0      | 0      | 0   | 489   | 778    | 778    | 0   | 294    | 0    | 0    | 489   | 0    | 0     | 778    |
| <b>C2H4</b>        | kg/hr | 0     | 0     | 0      | 0     | 0    | 0    | 0      | 0      | 0   | 1170  | 1833   | 1833   | 0   | 674    | 0    | 0    | 1170  | 22   | 25    | 1833   |
| <b>C3H6</b>        | kg/hr | 0     | 0     | 0      | 0     | 0    | 0    | 0      | 0      | 0   | 2651  | 4201   | 4201   | 0   | 1579   | 0    | 0    | 2651  | 0    | 0     | 4201   |
| <b>HCl</b>         | kg/hr | 0     | 0     | 0      | 0     | 0    | 0    | 0      | 0      | 0   | 11    | 0      | 0      | 0   | 0      | 0    | 0    | 0     | 0    | 0     | 0      |
| <b>C4H10</b>       | kg/hr | 0     | 0     | 0      | 0     | 0    | 0    | 0      | 0      | 0   | 563   | 946    | 946    | 0   | 391    | 0    | 0    | 563   | 0    | 0     | 946    |
| <b>N-C6H14</b>     | kg/hr | 0     | 0     | 0      | 0     | 0    | 0    | 0      | 0      | 0   | 9     | 31     | 31     | 0   | 23     | 0    | 0    | 9     | 0    | 0     | 31     |
| <b>C7H14</b>       | kg/hr | 0     | 0     | 0      | 0     | 0    | 0    | 0      | 0      | 0   | 13    | 121    | 121    | 0   | 110    | 0    | 0    | 13    | 0    | 0     | 121    |
| <b>BENZENE</b>     | kg/hr | 0     | 0     | 0      | 0     | 0    | 0    | 0      | 0      | 0   | 198   | 205    | 205    | 0   | 173    | 0    | 0    | 35    | 0    | 0     | 205    |
| <b>TOLUENE</b>     | kg/hr | 0     | 0     | 0      | 0     | 0    | 0    | 0      | 0      | 0   | 22    | 654    | 654    | 0   | 644    | 0    | 0    | 22    | 0    | 0     | 654    |
| <b>XYLENE</b>      | kg/hr | 0     | 0     | 0      | 0     | 0    | 0    | 0      | 0      | 0   | 6     | 1368   | 1368   | 0   | 1388   | 0    | 0    | 6     | 0    | 0     | 1368   |
| <b>CUMENE</b>      | kg/hr | 0     | 0     | 0      | 0     | 0    | 0    | 0      | 0      | 0   | 1     | 1050   | 1050   | 0   | 1068   | 0    | 0    | 1     | 0    | 0     | 1050   |
| <b>N-C8H18</b>     | kg/hr | 0     | 0     | 0      | 0     | 0    | 0    | 0      | 0      | 0   | 3     | 240    | 240    | 0   | 241    | 0    | 0    | 3     | 0    | 0     | 240    |
| <b>N-C9H20</b>     | kg/hr | 0     | 0     | 0      | 0     | 0    | 0    | 0      | 0      | 0   | 0.5   | 378    | 378    | 0   | 385    | 0    | 0    | 0.47  | 0    | 0     | 378    |
| <b>N-C10H22</b>    | kg/hr | 0     | 0     | 0      | 0     | 0    | 0    | 0      | 0      | 0   | 0     | 126    | 126    | 0   | 128    | 0    | 0    | 0     | 0    | 0     | 126    |
| <b>C11H24</b>      | kg/hr | 0     | 0     | 0      | 0     | 0    | 0    | 0      | 0      | 0   | 0     | 168    | 168    | 0   | 171    | 0    | 0    | 0     | 0    | 0     | 168    |
| <b>C12H26</b>      | kg/hr | 0     | 0     | 0      | 0     | 0    | 0    | 0      | 0      | 0   | 0     | 10     | 10     | 0   | 10     | 0    | 0    | 0     | 0    | 0     | 10     |
| <b>C13H28</b>      | kg/hr | 0     | 0     | 0      | 0     | 0    | 0    | 0      | 0      | 0   | 0     | 1      | 1      | 0   | 1      | 0    | 0    | 0     | 0    | 0     | 1      |
| <b>C15H32</b>      | kg/hr | 0     | 0     | 0      | 0     | 0    | 0    | 0      | 0      | 0   | 0     | 570    | 570    | 0   | 580    | 0    | 0    | 0     | 0    | 0     | 554    |
| <b>C24H50</b>      | kg/hr | 0     | 0     | 0      | 0     | 0    | 0    | 0      | 0      | 0   | 0     | 96     | 96     | 0   | 98     | 0    | 0    | 0     | 0    | 0     | 96     |
| <b>1-BUTENE</b>    | kg/hr | 0     | 0     | 0      | 0     | 0    | 0    | 0      | 0      | 0   | 1808  | 2997   | 2997   | 0   | 1212   | 0    | 0    | 1808  | 0    | 0     | 2997   |
| <b>BUTDIENE</b>    | kg/hr | 0     | 0     | 0      | 0     | 0    | 0    | 0      | 0      | 0   | 21    | 34     | 34     | 0   | 14     | 0    | 0    | 21    | 0    | 0     | 34     |
| <b>CO2</b>         | kg/hr | 0     | 0     | 3723   | 0     | 0    | 0    | 0      | 0      | 0   | 320   | 501    | 501    | 0   | 184    | 0    | 0    | 321   | 0    | 0     | 501    |
| <b>CO</b>          | kg/hr | 0     | 0     | 0      | 0     | 0    | 0    | 0      | 0      | 0   | 68    | 106    | 106    | 0   | 39     | 0    | 0    | 68    | 39   | 38    | 106    |
| <b>O2</b>          | kg/hr | 0     | 0     | 343    | 0     | 0    | 0    | 0      | 0      | 0   | 0     | 0      | 0      | 0   | 0      | 0    | 0    | 0     | 0    | 0     | 0      |
| <b>N2</b>          | kg/hr | 0     | 0     | 15364  | 0     | 0    | 0    | 0      | 0      | 0   | 0     | 0      | 0      | 0   | 0      | 0    | 0    | 0     | 0    | 0     | 0      |
| <b>ARGON</b>       | kg/hr | 0     | 0     | 250    | 0     | 0    | 0    | 0      | 0      | 0   | 0     | 0      | 0      | 0   | 0      | 0    | 0    | 0     | 0    | 0     | 0      |
| <b>CHAR</b>        | kg/hr | 0     | 0     | 0      | 0     | 0    | 0    | 0      | 0      | 0   | 0     | 299    | 299    | 296 | 3      | 3    | 299  | 0     | 0    | 0     | 0      |

## b. Process area: Phase Separation

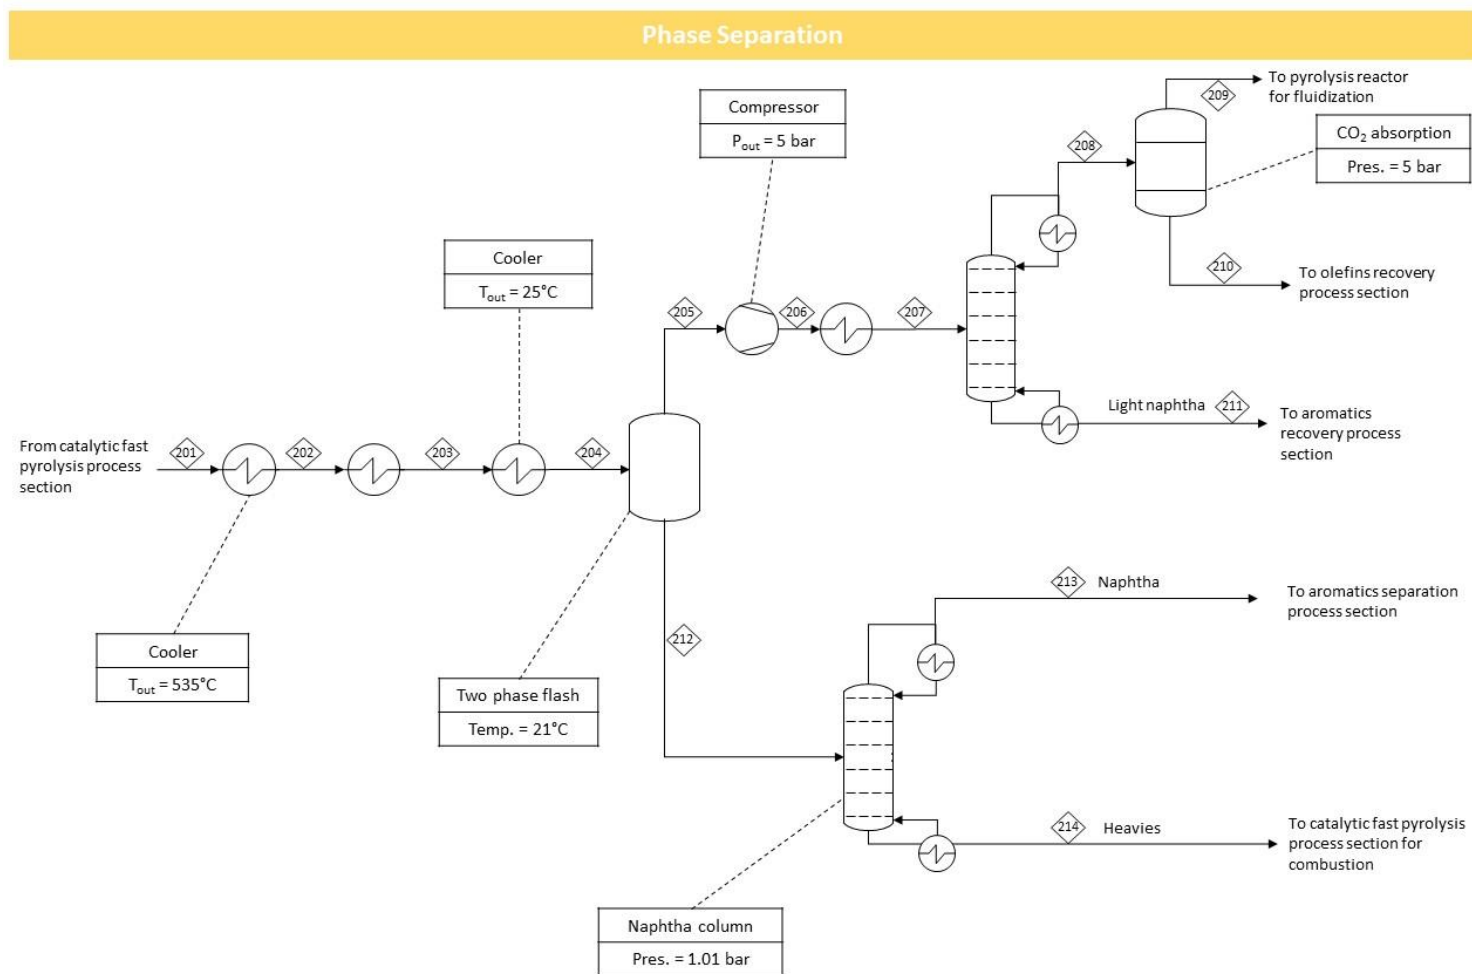

**Fig. S2.** Detailed PFD of pyrolysis phase separation into liquid and gaseous stream rich in aromatics and olefins, respectively (base case). Mixed plastic wastes and other raw inputs are shown in red; intermediate, recycle, and waste streams are shown in black.

## Streams composition

| Components         | Units | 201    | 202    | 203    | 204    | 205    | 206   | 207   | 208   | 209  | 210 | 211  | 212  | 213 | 214    |
|--------------------|-------|--------|--------|--------|--------|--------|-------|-------|-------|------|-----|------|------|-----|--------|
| <b>Total Flow</b>  | kg/hr | 17103  | 17103  | 17103  | 17103  | 12103  | 12103 | 12103 | 7800  | 4104 | 199 | 5000 | 4350 | 650 | 17103  |
| <b>Volume Flow</b> | l/min | 477036 | 438514 | 179325 | 132532 | 129965 | 25835 | 23527 | 16636 | 8352 | 5   | 107  | 91   | 19  | 477036 |
| <b>Temperature</b> | °C    | 670    | 594    | 90     | 25     | 25     | 43    | 23    | 22    | 22   | 21  | 21   | 20   | 275 | 670    |
| <b>Pressure</b>    | bar   | 1      | 1      | 1      | 1      | 1      | 5     | 5     | 5     | 5    | 5   | 1    | 1    | 1   | 1      |
| <b>H2</b>          | kg/hr | 38     | 38     | 38     | 38     | 14     | 14    | 14    | 14    | 14   | 0   | 0    | 0    | 0   | 38     |
| <b>CH4</b>         | kg/hr | 405    | 405    | 405    | 405    | 146    | 146   | 146   | 146   | 146  | 0   | 0    | 0    | 0   | 405    |
| <b>C2H6</b>        | kg/hr | 248    | 248    | 248    | 248    | 89     | 89    | 89    | 89    | 89   | 0   | 1    | 1    | 0   | 248    |
| <b>C3H8</b>        | kg/hr | 778    | 778    | 778    | 778    | 279    | 279   | 279   | 279   | 275  | 4   | 10   | 10   | 0   | 778    |
| <b>C2H4</b>        | kg/hr | 1833   | 1833   | 1833   | 1833   | 659    | 659   | 659   | 659   | 658  | 1   | 3    | 3    | 0   | 1833   |
| <b>C3H6</b>        | kg/hr | 4201   | 4201   | 4201   | 4201   | 1506   | 1506  | 1506  | 1506  | 1490 | 16  | 43   | 43   | 0   | 4201   |
| <b>HCl</b>         | kg/hr | 946    | 946    | 946    | 946    | 332    | 332   | 332   | 332   | 316  | 16  | 51   | 51   | 0   | 946    |
| <b>C4H10</b>       | kg/hr | 31     | 31     | 31     | 31     | 8      | 8     | 8     | 8     | 5    | 3   | 15   | 15   | 0   | 31     |
| <b>N-C6H14</b>     | kg/hr | 121    | 121    | 121    | 121    | 17     | 17    | 17    | 17    | 7    | 10  | 91   | 91   | 0   | 121    |
| <b>C7H14</b>       | kg/hr | 205    | 205    | 205    | 205    | 37     | 37    | 37    | 37    | 19   | 17  | 133  | 133  | 0   | 205    |
| <b>BENZENE</b>     | kg/hr | 654    | 654    | 654    | 654    | 48     | 48    | 48    | 48    | 12   | 36  | 584  | 584  | 0   | 654    |
| <b>TOLUENE</b>     | kg/hr | 1368   | 1368   | 1368   | 1368   | 33     | 33    | 33    | 33    | 3    | 29  | 1330 | 1330 | 0   | 1368   |
| <b>XYLENE</b>      | kg/hr | 1050   | 1050   | 1050   | 1050   | 13     | 13    | 13    | 13    | 1    | 12  | 1036 | 1036 | 0   | 1050   |
| <b>CUMENE</b>      | kg/hr | 240    | 240    | 240    | 240    | 10     | 10    | 10    | 10    | 2    | 8   | 227  | 227  | 0   | 240    |
| <b>N-C8H18</b>     | kg/hr | 378    | 378    | 378    | 378    | 4      | 4     | 5     | 5     | 0    | 4   | 373  | 373  | 0   | 378    |
| <b>N-C9H20</b>     | kg/hr | 126    | 126    | 126    | 126    | 0      | 0     | 0     | 0     | 0    | 0   | 125  | 125  | 0   | 126    |
| <b>N-C10H22</b>    | kg/hr | 168    | 168    | 168    | 168    | 0      | 0     | 0.2   | 0.2   | 0    | 0   | 168  | 168  | 0   | 168    |
| <b>C11H24</b>      | kg/hr | 10     | 10     | 10     | 10     | 0      | 0     | 0     | 0     | 0    | 0   | 10   | 10   | 0   | 10     |
| <b>C12H26</b>      | kg/hr | 1      | 1      | 1      | 1      | 0      | 0     | 0     | 0     | 0    | 0   | 1    | 1    | 0   | 1      |
| <b>C13H28</b>      | kg/hr | 570    | 570    | 570    | 570    | 0      | 0     | 0     | 0     | 0    | 0   | 569  | 15   | 554 | 570    |
| <b>C15H32</b>      | kg/hr | 96     | 96     | 96     | 96     | 0      | 0     | 0     | 0     | 0    | 0   | 96   | 0    | 96  | 96     |
| <b>C24H50</b>      | kg/hr | 2997   | 2997   | 2997   | 2997   | 1058   | 1058  | 1058  | 1058  | 1016 | 42  | 132  | 131  | 0   | 2997   |
| <b>1-BUTENE</b>    | kg/hr | 34     | 34     | 34     | 34     | 12     | 12    | 12    | 12    | 12   | 1   | 2    | 2    | 0   | 34     |
| <b>BUTDIENE</b>    | kg/hr | 501    | 501    | 501    | 501    | 180    | 180   | 180   | 0     | 0    | 0   | 1    | 1    | 0   | 501    |
| <b>CO2</b>         | kg/hr | 106    | 106    | 106    | 106    | 38     | 38    | 38    | 38    | 38   | 0   | 0    | 0    | 0   | 106    |
| <b>CO</b>          | kg/hr | 0      | 0      | 0      | 0      | 0      | 0     | 0     | 0     | 0    | 0   | 0    | 0    | 0   | 0      |
| <b>O2</b>          | kg/hr | 0      | 0      | 0      | 0      | 0      | 0     | 0     | 0     | 0    | 0   | 0    | 0    | 0   | 0      |
| <b>N2</b>          | kg/hr | 0      | 0      | 0      | 0      | 0      | 0     | 0     | 0     | 0    | 0   | 0    | 0    | 0   | 0      |
| <b>ARGON</b>       | kg/hr | 0      | 0      | 0      | 0      | 0      | 0     | 0     | 0     | 0    | 0   | 0    | 0    | 0   | 0      |
| <b>CHAR</b>        | kg/hr | 17103  | 17103  | 17103  | 17103  | 12103  | 12103 | 12103 | 7800  | 4104 | 199 | 5000 | 4350 | 650 | 17103  |



### c. Process area: Olefins Recovery

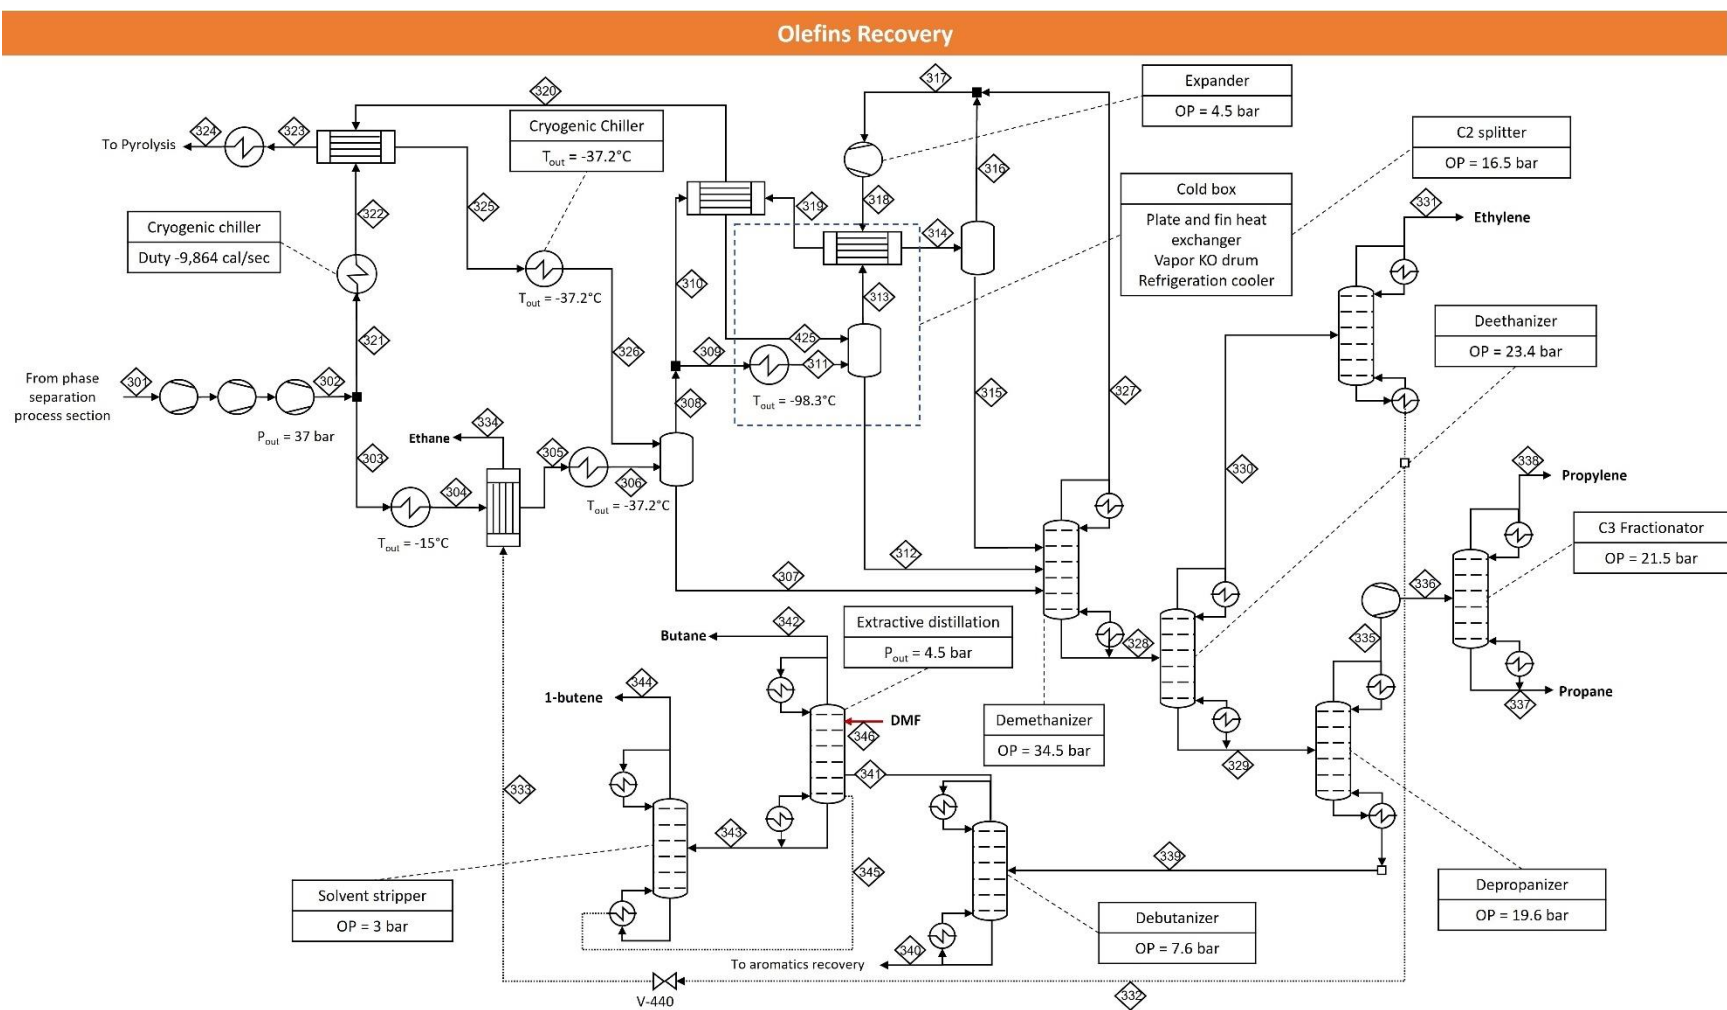

**Fig. S3.** Detailed PFD of recovery of olefins from the gaseous stream of the pyrolysis effluent (base case). Mixed plastic wastes and other raw inputs are shown in red; intermediate, recycle, and waste streams are shown in black.

### Streams composition

|                    |              |            |            |            |            |            |            |            |            |            |            |            |            |            |            |            |            |            |            |            |            |            |            |            |
|--------------------|--------------|------------|------------|------------|------------|------------|------------|------------|------------|------------|------------|------------|------------|------------|------------|------------|------------|------------|------------|------------|------------|------------|------------|------------|
| <b>Components</b>  | <b>Units</b> | <b>301</b> | <b>302</b> | <b>303</b> | <b>304</b> | <b>305</b> | <b>306</b> | <b>307</b> | <b>308</b> | <b>309</b> | <b>310</b> | <b>311</b> | <b>312</b> | <b>313</b> | <b>314</b> | <b>315</b> | <b>316</b> | <b>317</b> | <b>318</b> | <b>319</b> | <b>320</b> | <b>321</b> | <b>322</b> | <b>323</b> |
| <b>Mass Flows</b>  | kg/hr        | 4104       | 4104       | 3612       | 3612       | 3612       | 3612       | 4005       | 100        | 78         | 22         | 78         | 44         | 56         | 56         | 14         | 42         | 222        | 222        | 222        | 222        | 493        | 493        | 222        |
| <b>Volume Flow</b> | l/min        | 8352       | 576        | 506        | 195        | 190        | 166        | 118        | 70         | 55         | 15         | 34         | 1          | 42         | 31         | 1          | 31         | 105        | 649        | 721        | 765        | 69         | 23         | 789        |
| <b>Temperature</b> | °C           | 22         | 50         | 50         | -15        | -18        | -37        | -37        | -37        | -37        | -98        | -98        | -98        | -129       | -129       | -129       | -97        | -141       | -133       | -128       | 50         | -31        | -126       |            |
| <b>Pressure</b>    | bar          | 5          | 38         | 38         | 38         | 38         | 37         | 37         | 37         | 37         | 37         | 37         | 37         | 37         | 37         | 37         | 34         | 4          | 4          | 4          | 4          | 38         | 38         | 4          |
| <b>H2</b>          | kg/hr        | 14         | 14         | 12         | 12         | 12         | 12         | 5          | 9          | 7          | 2          | 7          | 0          | 9          | 9          | 0          | 9          | 14         | 14         | 14         | 14         | 2          | 2          | 14         |
| <b>CH4</b>         | kg/hr        | 146        | 146        | 128        | 128        | 128        | 128        | 114        | 31         | 24         | 7          | 24         | 6          | 25         | 25         | 6          | 19         | 146        | 146        | 146        | 146        | 17         | 17         | 146        |
| <b>C2H6</b>        | kg/hr        | 89         | 89         | 78         | 78         | 78         | 78         | 87         | 2          | 2          | 1          | 2          | 2          | 0          | 0          | 0          | 0          | 0          | 0          | 0          | 0          | 11         | 11         | 0          |
| <b>C3H8</b>        | kg/hr        | 275        | 275        | 242        | 242        | 242        | 242        | 274        | 1          | 1          | 1          | 1          | 0          | 0          | 0          | 0          | 0          | 0          | 0          | 0          | 0          | 33         | 33         | 0          |
| <b>C2H4</b>        | kg/hr        | 658        | 658        | 579        | 579        | 579        | 579        | 629        | 29         | 22         | 6          | 22         | 22         | 7          | 7          | 6          | 1          | 25         | 25         | 25         | 25         | 79         | 79         | 25         |
| <b>C3H6</b>        | kg/hr        | 1490       | 1490       | 1312       | 1312       | 1312       | 1312       | 1481       | 10         | 7          | 2          | 7          | 9          | 0          | 0          | 0          | 0          | 0          | 0          | 0          | 0          | 179        | 179        | 0          |
| <b>C4H10</b>       | kg/hr        | 316        | 316        | 278        | 278        | 278        | 278        | 316        | 0          | 0          | 0          | 0          | 0          | 0          | 0          | 0          | 0          | 0          | 0          | 0          | 0          | 38         | 38         | 0          |
| <b>N-C6H14</b>     | kg/hr        | 5          | 5          | 4          | 4          | 4          | 4          | 5          | 0          | 0          | 0          | 0          | 0          | 0          | 0          | 0          | 0          | 0          | 0          | 0          | 0          | 1          | 1          | 0          |
| <b>C6H12</b>       | kg/hr        | 0          | 0          | 0          | 0          | 0          | 0          | 0          | 0          | 0          | 0          | 0          | 0          | 0          | 0          | 0          | 0          | 0          | 0          | 0          | 0          | 0          | 0          | 0          |
| <b>C7H14</b>       | kg/hr        | 7          | 7          | 6          | 6          | 6          | 6          | 7          | 0          | 0          | 0          | 0          | 0          | 0          | 0          | 0          | 0          | 0          | 0          | 0          | 0          | 1          | 1          | 0          |
| <b>BENZENE</b>     | kg/hr        | 19         | 19         | 17         | 17         | 17         | 17         | 19         | 0          | 0          | 0          | 0          | 0          | 0          | 0          | 0          | 0          | 0          | 0          | 0          | 0          | 2          | 2          | 0          |
| <b>TOLUENE</b>     | kg/hr        | 12         | 12         | 11         | 11         | 11         | 11         | 12         | 0          | 0          | 0          | 0          | 0          | 0          | 0          | 0          | 0          | 0          | 0          | 0          | 0          | 1          | 1          | 0          |
| <b>XYLENE</b>      | kg/hr        | 3          | 3          | 3          | 3          | 3          | 3          | 3          | 0          | 0          | 0          | 0          | 0          | 0          | 0          | 0          | 0          | 0          | 0          | 0          | 0          | 0          | 0          | 0          |
| <b>N-C8H18</b>     | kg/hr        | 2          | 2          | 1          | 1          | 1          | 1          | 2          | 0          | 0          | 0          | 0          | 0          | 0          | 0          | 0          | 0          | 0          | 0          | 0          | 0          | 0          | 0          | 0          |
| <b>N-C10H22</b>    | kg/hr        | 0          | 0          | 0          | 0          | 0          | 0          | 0          | 0          | 0          | 0          | 0          | 0          | 0          | 0          | 0          | 0          | 0          | 0          | 0          | 0          | 0          | 0          | 0          |
| <b>N-C9H20</b>     | kg/hr        | 0          | 0          | 0          | 0          | 0          | 0          | 0          | 0          | 0          | 0          | 0          | 0          | 0          | 0          | 0          | 0          | 0          | 0          | 0          | 0          | 0          | 0          | 0          |
| <b>CUMENE</b>      | kg/hr        | 1          | 1          | 1          | 1          | 1          | 1          | 1          | 0          | 0          | 0          | 0          | 0          | 0          | 0          | 0          | 0          | 0          | 0          | 0          | 0          | 0          | 0          | 0          |
| <b>C11H24</b>      | kg/hr        | 0          | 0          | 0          | 0          | 0          | 0          | 0          | 0          | 0          | 0          | 0          | 0          | 0          | 0          | 0          | 0          | 0          | 0          | 0          | 0          | 0          | 0          | 0          |
| <b>C12H26</b>      | kg/hr        | 0          | 0          | 0          | 0          | 0          | 0          | 0          | 0          | 0          | 0          | 0          | 0          | 0          | 0          | 0          | 0          | 0          | 0          | 0          | 0          | 0          | 0          | 0          |
| <b>C13H28</b>      | kg/hr        | 0          | 0          | 0          | 0          | 0          | 0          | 0          | 0          | 0          | 0          | 0          | 0          | 0          | 0          | 0          | 0          | 0          | 0          | 0          | 0          | 0          | 0          | 0          |
| <b>C15H32</b>      | kg/hr        | 0          | 0          | 0          | 0          | 0          | 0          | 0          | 0          | 0          | 0          | 0          | 0          | 0          | 0          | 0          | 0          | 0          | 0          | 0          | 0          | 0          | 0          | 0          |
| <b>C20H42</b>      | kg/hr        | 0          | 0          | 0          | 0          | 0          | 0          | 0          | 0          | 0          | 0          | 0          | 0          | 0          | 0          | 0          | 0          | 0          | 0          | 0          | 0          | 0          | 0          | 0          |
| <b>C24H50</b>      | kg/hr        | 0          | 0          | 0          | 0          | 0          | 0          | 0          | 0          | 0          | 0          | 0          | 0          | 0          | 0          | 0          | 0          | 0          | 0          | 0          | 0          | 0          | 0          | 0          |
| <b>1-BUTENE</b>    | kg/hr        | 1016       | 1016       | 894        | 894        | 894        | 894        | 1015       | 1          | 1          | 0          | 1          | 1          | 0          | 0          | 0          | 0          | 0          | 0          | 0          | 0          | 122        | 122        | 0          |
| <b>BUTDIENE</b>    | kg/hr        | 12         | 12         | 10         | 10         | 10         | 10         | 12         | 0          | 0          | 0          | 0          | 0          | 0          | 0          | 0          | 0          | 0          | 0          | 0          | 0          | 1          | 1          | 0          |
| <b>CO2</b>         | kg/hr        | 0          | 0          | 0          | 0          | 0          | 0          | 0          | 0          | 0          | 0          | 0          | 0          | 0          | 0          | 0          | 0          | 0          | 0          | 0          | 0          | 0          | 0          | 0          |
| <b>CO</b>          | kg/hr        | 38         | 38         | 34         | 34         | 34         | 34         | 22         | 16         | 12         | 3          | 12         | 1          | 15         | 15         | 1          | 14         | 38         | 38         | 38         | 38         | 5          | 5          | 38         |
| <b>O2</b>          | kg/hr        | 0          | 0          | 0          | 0          | 0          | 0          | 0          | 0          | 0          | 0          | 0          | 0          | 0          | 0          | 0          | 0          | 0          | 0          | 0          | 0          | 0          | 0          | 0          |
| <b>DMF</b>         | kg/hr        | 0          | 0          | 0          | 0          | 0          | 0          | 0          | 0          | 0          | 0          | 0          | 0          | 0          | 0          | 0          | 0          | 0          | 0          | 0          | 0          | 0          | 0          | 0          |

  

|                    |              |            |            |            |            |            |            |            |            |            |            |            |            |            |            |            |            |            |            |            |            |            |            |            |
|--------------------|--------------|------------|------------|------------|------------|------------|------------|------------|------------|------------|------------|------------|------------|------------|------------|------------|------------|------------|------------|------------|------------|------------|------------|------------|
| <b>Components</b>  | <b>Units</b> | <b>324</b> | <b>325</b> | <b>326</b> | <b>327</b> | <b>328</b> | <b>329</b> | <b>330</b> | <b>331</b> | <b>332</b> | <b>333</b> | <b>334</b> | <b>335</b> | <b>336</b> | <b>337</b> | <b>338</b> | <b>339</b> | <b>340</b> | <b>341</b> | <b>342</b> | <b>343</b> | <b>344</b> | <b>345</b> | <b>346</b> |
| <b>Mass Flows</b>  | kg/hr        | 222        | 493        | 493        | 180        | 3882       | 3170       | 712        | 636        | 76         | 76         | 76         | 1781       | 1781       | 277        | 1504       | 1388       | 56         | 1333       | 315        | 8080       | 1022       | 7058       | 4          |
| <b>Volume Flow</b> | l/min        | 1594       | 23         | 23         | 69         | 147        | 116        | 260        | 343        | 3          | 18         | 86         | 678        | 632        | 11         | 518        | 50         | 1          | 42         | 534        | 173        | 2691       | 155        | 125        |
| <b>Temperature</b> | °C           | 12         | -34        | -37        | -87        | 58         | 75         | -20        | -35        | -14        | -37        | -36        | 49         | 54         | 61         | 52         | 108        | 141        | 61         | 47         | 120        | 47         | 197        | 25         |
| <b>Pressure</b>    | bar          | 4          | 37         | 37         | 34         | 34         | 23         | 23         | 17         | 17         | 8          | 8          | 20         | 21         | 21         | 21         | 20         | 8          | 8          | 5          | 5          | 3          | 3          | 1          |
| <b>H2</b>          | kg/hr        | 14         | 2          | 2          | 5          | 0          | 0          | 0          | 0          | 0          | 0          | 0          | 0          | 0          | 0          | 0          | 0          | 0          | 0          | 0          | 0          | 0          | 0          | 0          |
| <b>CH4</b>         | kg/hr        | 146        | 17         | 17         | 127        | 0          | 0          | 0          | 0          | 0          | 0          | 0          | 0          | 0          | 0          | 0          | 0          | 0          | 0          | 0          | 0          | 0          | 0          | 0          |
| <b>C2H6</b>        | kg/hr        | 0          | 11         | 11         | 0          | 89         | 11         | 78         | 4          | 74         | 74         | 74         | 11         | 11         | 0          | 11         | 0          | 0          | 0          | 0          | 0          | 0          | 0          | 0          |
| <b>C3H8</b>        | kg/hr        | 0          | 33         | 33         | 0          | 275        | 275        | 0          | 0          | 0          | 0          | 0          | 275        | 275        | 266        | 9          | 0          | 0          | 0          | 0          | 0          | 0          | 0          | 0          |
| <b>C2H4</b>        | kg/hr        | 25         | 79         | 79         | 24         | 633        | 1          | 632        | 0          | 0          | 0          | 0          | 1          | 1          | 0          | 1          | 0          | 0          | 0          | 0          | 0          | 0          | 0          | 0          |
| <b>C3H6</b>        | kg/hr        | 0          | 179        | 179        | 0          | 1490       | 1488       | 2          | 0          | 2          | 2          | 2          | 1488       | 1488       | 5          | 1484       | 0          | 0          | 0          | 0          | 0          | 0          | 0          | 0          |
| <b>C4H10</b>       | kg/hr        | 0          | 38         | 38         | 0          | 316        | 316        | 0          | 0          | 0          | 0          | 0          | 0          | 0          | 0          | 0          | 316        | 3          | 313        | 313        | 0          | 0          | 0          | 0          |
| <b>N-C6H14</b>     | kg/hr        | 0          | 1          | 1          | 0          | 5          | 5          | 0          | 0          | 0          | 0          | 0          | 0          | 0          | 0          | 0          | 5          | 5          | 0          | 0          | 0          | 0          | 0          | 0          |
| <b>C6H12</b>       | kg/hr        | 0          | 0          | 0          | 0          | 0          | 0          | 0          | 0          | 0          | 0          | 0          | 0          | 0          | 0          | 0          | 0          | 0          | 0          | 0          | 0          | 0          | 0          | 0          |
| <b>C7H14</b>       | kg/hr        | 0          | 1          | 1          | 0          | 7          | 7          | 0          | 0          | 0          | 0          | 0          | 0          | 0          | 0          | 7          | 7          | 0          | 0          | 0          | 0          | 0          | 0          | 0          |
| <b>BENZENE</b>     | kg/hr        | 0          | 2          | 2          | 0          | 19         | 19         | 0          | 0          | 0          | 0          | 0          | 0          | 0          | 0          | 0          | 19         | 19         | 0          | 0          | 0          | 0          | 0          | 0          |
| <b>TOLUENE</b>     | kg/hr        | 0          | 1          | 1          | 0          | 12         | 12         | 0          | 0          | 0          | 0          | 0          | 0          | 0          | 0          | 0          | 12         | 12         | 0          | 0          | 0          | 0          | 0          | 0          |
| <b>XYLENE</b>      | kg/hr        | 0          | 0          | 0          | 0          | 3          | 3          | 0          | 0          | 0          | 0          | 0          | 0          | 0          | 0          | 0          | 3          | 3          | 0          | 0          | 0          | 0          | 0          | 0          |
| <b>N-C8H18</b>     | kg/hr        | 0          | 0          | 0          | 0          | 2          | 2          | 0          | 0          | 0          | 0          | 0          | 0          | 0          | 0          | 0          | 2          | 2          | 0          | 0          | 0          | 0          | 0          | 0          |
| <b>N-C10H22</b>    | kg/hr        | 0          | 0          | 0          | 0          | 0          | 0          | 0          | 0          | 0          | 0          | 0          | 0          | 0          | 0          | 0          | 0          | 0          | 0          | 0          | 0          | 0          | 0          | 0          |
| <b>N-C9H20</b>     | kg/hr        | 0          | 0          | 0          | 0          | 0          | 0          | 0          | 0          | 0          | 0          | 0          | 0          | 0          | 0          | 0          | 0          | 0          | 0          | 0          | 0          | 0          | 0          | 0          |
| <b>CUMENE</b>      | kg/hr        | 0          | 0          | 0          | 0          | 1          | 1          | 0          | 0          | 0          | 0          | 0          | 0          | 0          | 0          | 1          | 1          | 0          | 0          | 0          | 0          | 0          | 0          | 0          |
| <b>C11H24</b>      | kg/hr        | 0          | 0          | 0          | 0          | 0          | 0          | 0          | 0          | 0          | 0          | 0          | 0          | 0          | 0          | 0          | 0          | 0          | 0          | 0          | 0          | 0          | 0          | 0          |
| <b>C12H26</b>      | kg/hr        | 0          | 0          | 0          | 0          | 0          | 0          | 0          | 0          | 0          | 0          | 0          | 0          | 0          | 0          | 0          | 0          | 0          | 0          | 0          | 0          | 0          | 0          | 0          |
| <b>C13H28</b>      | kg/hr        | 0          | 0          | 0          | 0          | 0          | 0          | 0          | 0          | 0          | 0          | 0          | 0          | 0          | 0          | 0          | 0          | 0          | 0          | 0          | 0          | 0          | 0          | 0          |
| <b>C15H32</b>      | kg/hr        | 0          | 0          | 0          | 0          | 0          | 0          | 0          | 0          | 0          | 0          | 0          | 0          | 0          | 0          | 0          | 0          | 0          | 0          | 0          | 0          | 0          | 0          | 0          |
| <b>C20H42</b>      | kg/hr        | 0          | 0          | 0          | 0          | 0          | 0          | 0          | 0          | 0          | 0          | 0          | 0          | 0          | 0          | 0          | 0          | 0          | 0          | 0          | 0          | 0          | 0          | 0          |
| <b>C24H50</b>      | kg/hr        | 0          | 0          | 0          | 0          | 0          | 0          | 0          | 0          | 0          | 0          | 0          | 0          | 0          | 0          | 0          | 0          | 0          | 0          | 0          | 0          | 0          | 0          | 0          |
| <b>1-BUTENE</b>    | kg/hr        | 0          | 122        | 122        | 0          | 1016       | 1016       | 0          | 0          | 0          | 0          | 6          | 6          | 6          | 6          | 0          | 1010       | 3          | 1008       | 0          | 1008       | 1008       | 0          | 0          |
| <b>BUTDIENE</b>    | kg/hr        | 0          | 1          | 1          | 0          | 12         | 12         | 0          | 0          | 0          | 0          | 0          | 0          | 0          | 0          | 0          | 11         | 0          | 11         | 1          | 10         | 10         | 0          | 0          |
| <b>CO2</b>         | kg/hr        | 0          | 0          | 0          | 0          | 0          | 0          | 0          | 0          | 0          | 0          | 0          | 0          | 0          | 0          | 0          | 0          | 0          | 0          | 0          | 0          | 0          | 0          | 0          |
| <b>CO</b>          | kg/hr        | 38         | 5          | 5          | 24         | 0          | 0          | 0          | 0          | 0          | 0          | 0          | 0          | 0          | 0          | 0          | 0          | 0          | 0          | 0          | 0          | 0          | 0          | 0          |
| <b>O2</b>          | kg/hr        | 0          | 0          | 0          | 0          | 0          | 0          | 0          | 0          | 0          | 0          | 0          | 0          | 0          | 0          | 0          | 0          | 0          | 0          | 0          | 0          | 0          | 0          | 0          |
| <b>DMF</b>         | kg/hr        | 0          | 0          | 0          | 0          | 0          | 0          | 0          | 0          | 0          | 0          | 0          | 0          | 0          | 0          | 0          | 0          | 0          | 0          | 1          | 7062       | 4          | 7058       | 4          |

d. Process area: Aromatic Hydrocarbons Recovery

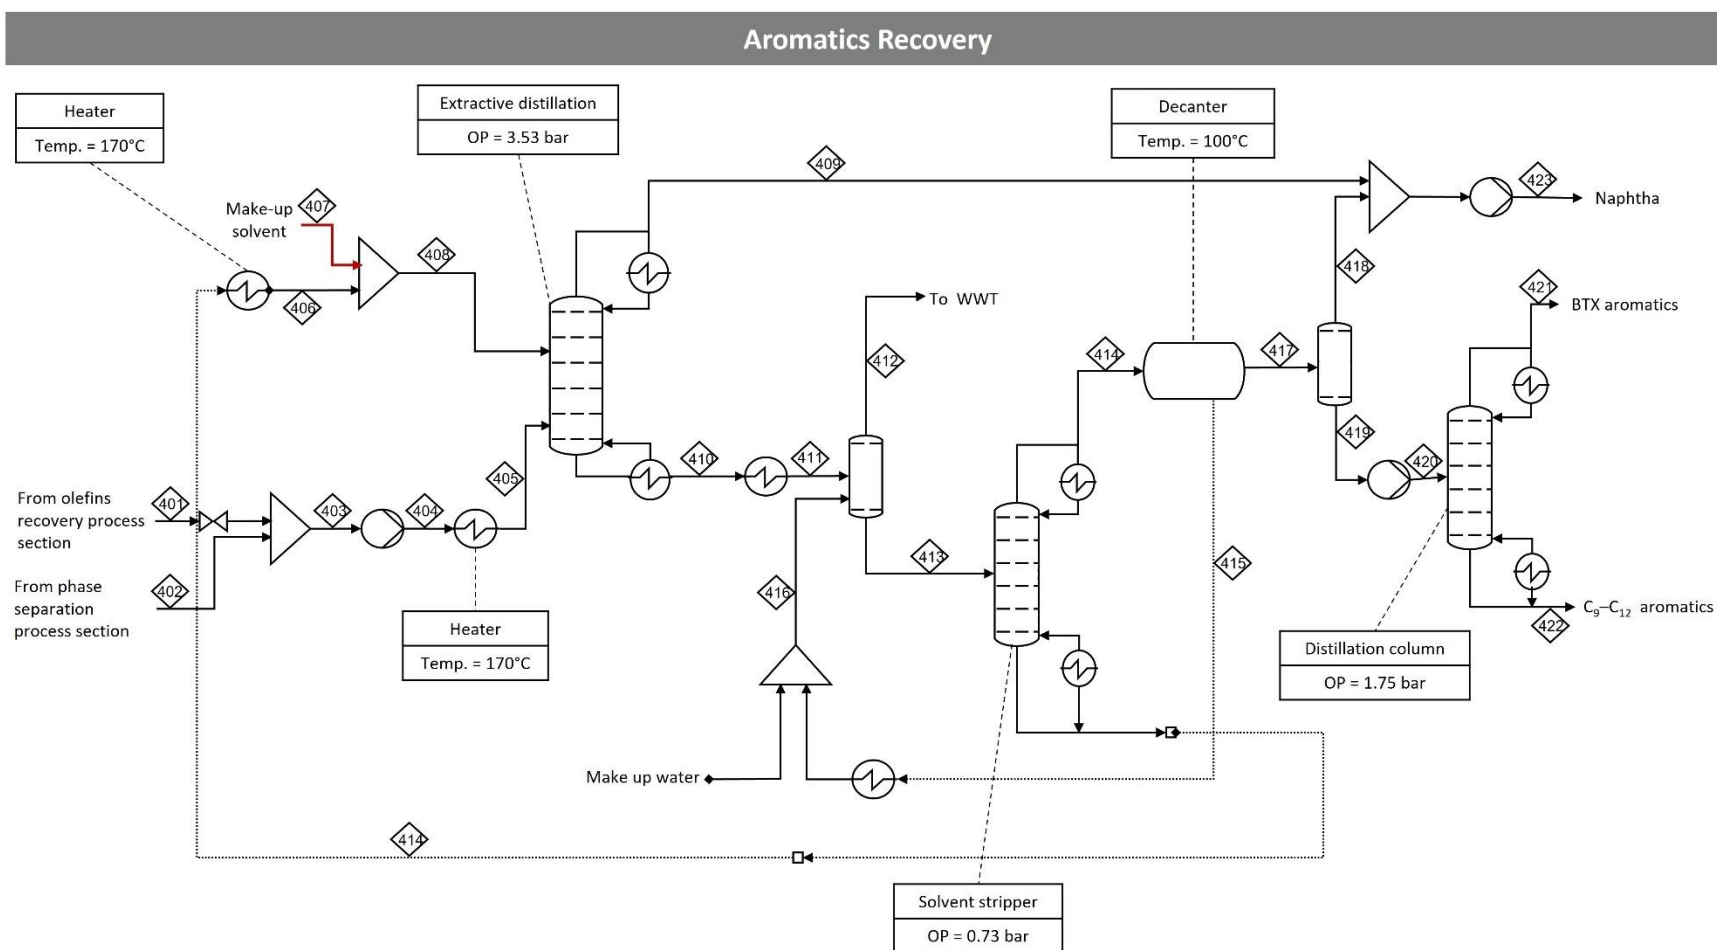

**Fig. S4.** Detailed PFD of the aromatic hydrocarbons recovery process section (base case). Mixed plastic wastes and other raw inputs are shown in red; intermediate, recycle, and waste streams are shown in black.

Streams composition

| Components  | Units | 401 | 402  | 403  | 404  | 405  | 406   | 407 | 408   | 409 | 410   | 411   | 412 | 413   | 414   | 415 | 416 | 417  | 418 | 419  | 420  | 421  | 422  | 423  |
|-------------|-------|-----|------|------|------|------|-------|-----|-------|-----|-------|-------|-----|-------|-------|-----|-----|------|-----|------|------|------|------|------|
| Mass Flows  | kg/hr | 56  | 4350 | 4406 | 4406 | 4406 | 10086 | 21  | 10106 | 363 | 14149 | 14149 | 397 | 14126 | 10086 | 196 | 996 | 3845 | 859 | 2986 | 2986 | 1971 | 1015 | 1844 |
| Volume Flow | l/min | 1   | 91   | 95   | 92   | 2418 | 161   | 0   | 161   | 9   | 277   | 238   | 7   | 232   | 171   | 4   | 17  | 85   | 272 | 63   | 63   | 44   | 24   | 855  |
| Temperature | °C    | 141 | 20   | 21   | 22   | 170  | 170   | 160 | 170   | 4   | 232   | 90    | 72  | 72    | 233   | 100 | 37  | 100  | 99  | 99   | 99   | 147  | 175  | 61   |
| Pressure    | bar   | 8   | 1    | 1    | 4    | 4    | 4     | 4   | 4     | 4   | 4     | 1     | 1   | 1     | 1     | 1   | 1   | 1    | 1   | 1    | 2    | 2    | 2    | 1    |
| H2          | kg/hr | 0   | 0    | 0    | 0    | 0    | 0     | 0   | 0     | 0   | 0     | 0     | 0   | 0     | 0     | 0   | 0   | 0    | 0   | 0    | 0    | 0    | 0    | 0    |
| CH4         | kg/hr | 0   | 0    | 0    | 0    | 0    | 0     | 0   | 0     | 0   | 0     | 0     | 0   | 0     | 0     | 0   | 0   | 0    | 0   | 0    | 0    | 0    | 0    | 0    |
| C2H6        | kg/hr | 0   | 1    | 1    | 1    | 1    | 0     | 0   | 0     | 1   | 0     | 0     | 0   | 0     | 0     | 0   | 0   | 0    | 0   | 0    | 0    | 0    | 0    | 1    |
| C3H8        | kg/hr | 0   | 10   | 10   | 10   | 10   | 0     | 0   | 0     | 10  | 0     | 0     | 0   | 0     | 0     | 0   | 0   | 0    | 0   | 0    | 0    | 0    | 0    | 10   |
| C2H4        | kg/hr | 0   | 3    | 3    | 3    | 3    | 0     | 0   | 0     | 3   | 0     | 0     | 0   | 0     | 0     | 0   | 0   | 0    | 0   | 0    | 0    | 0    | 0    | 3    |
| C3H6        | kg/hr | 0   | 43   | 43   | 43   | 43   | 0     | 0   | 0     | 43  | 0     | 0     | 0   | 0     | 0     | 0   | 0   | 0    | 0   | 0    | 0    | 0    | 0    | 43   |
| C4H10       | kg/hr | 3   | 51   | 54   | 54   | 54   | 0     | 0   | 0     | 54  | 0     | 0     | 0   | 0     | 0     | 0   | 0   | 0    | 0   | 0    | 0    | 0    | 0    | 54   |
| N-C6H14     | kg/hr | 5   | 15   | 20   | 20   | 20   | 0     | 0   | 0     | 2   | 18    | 18    | 0   | 9     | 0     | 0   | 0   | 9    | 9   | 0    | 0    | 0    | 0    | 20   |
| C6H12       | kg/hr | 0   | 0    | 0    | 0    | 0    | 0     | 0   | 0     | 0   | 0     | 0     | 0   | 0     | 0     | 0   | 0   | 0    | 0   | 0    | 0    | 0    | 0    | 0    |
| C7H14       | kg/hr | 7   | 91   | 98   | 98   | 98   | 0     | 0   | 0     | 98  | 98    | 0     | 98  | 0     | 1     | 1   | 97  | 97   | 0   | 0    | 0    | 0    | 0    | 98   |
| C8H16       | kg/hr | 0   | 0    | 0    | 0    | 0    | 0     | 0   | 0     | 0   | 0     | 0     | 0   | 0     | 0     | 0   | 0   | 0    | 0   | 0    | 0    | 0    | 0    | 0    |
| C9H18       | kg/hr | 0   | 0    | 0    | 0    | 0    | 0     | 0   | 0     | 0   | 0     | 0     | 0   | 0     | 0     | 0   | 0   | 0    | 0   | 0    | 0    | 0    | 0    | 0    |
| C11H22      | kg/hr | 0   | 0    | 0    | 0    | 0    | 0     | 0   | 0     | 0   | 0     | 0     | 0   | 0     | 0     | 0   | 0   | 0    | 0   | 0    | 0    | 0    | 0    | 0    |
| BENZENE     | kg/hr | 19  | 133  | 153  | 153  | 153  | 0     | 0   | 0     | 111 | 42    | 42    | 0   | 42    | 0     | 0   | 0   | 42   | 0   | 42   | 42   | 42   | 0    | 111  |
| TOLUENE     | kg/hr | 12  | 584  | 596  | 596  | 596  | 0     | 0   | 0     | 2   | 594   | 594   | 0   | 588   | 0     | 0   | 0   | 588  | 0   | 588  | 588  | 588  | 0    | 8    |
| XYLENE      | kg/hr | 3   | 1330 | 1333 | 1333 | 1333 | 0     | 0   | 0     | 0   | 1333  | 1333  | 0   | 1320  | 0     | 0   | 0   | 1320 | 0   | 1320 | 1320 | 1317 | 3    | 13   |
| N-C8H18     | kg/hr | 2   | 227  | 228  | 228  | 228  | 0     | 0   | 0     | 0   | 228   | 228   | 0   | 228   | 0     | 0   | 0   | 228  | 228 | 0    | 0    | 0    | 0    | 228  |
| N-C10H22    | kg/hr | 0   | 125  | 125  | 125  | 125  | 1024  | 0   | 1024  | 0   | 1149  | 1149  | 0   | 1149  | 1024  | 0   | 0   | 125  | 125 | 0    | 0    | 0    | 0    | 125  |
| N-C9H20     | kg/hr | 0   | 373  | 373  | 373  | 373  | 25    | 0   | 25    | 0   | 398   | 398   | 0   | 398   | 25    | 0   | 0   | 373  | 373 | 0    | 0    | 0    | 0    | 373  |
| CUMENE      | kg/hr | 1   | 1036 | 1036 | 1036 | 1036 | 246   | 0   | 246   | 0   | 1283  | 1283  | 0   | 1283  | 246   | 0   | 0   | 1036 | 0   | 1036 | 1036 | 24   | 1013 | 0    |
| C11H24      | kg/hr | 0   | 168  | 168  | 168  | 168  | 0     | 0   | 0     | 0   | 168   | 168   | 0   | 0     | 0     | 0   | 0   | 0    | 0   | 0    | 0    | 0    | 0    | 168  |
| C12H26      | kg/hr | 0   | 10   | 10   | 10   | 10   | 0     | 0   | 0     | 0   | 10    | 10    | 0   | 0     | 0     | 0   | 0   | 0    | 0   | 0    | 0    | 0    | 0    | 10   |
| C13H28      | kg/hr | 0   | 1    | 1    | 1    | 1    | 0     | 0   | 0     | 0   | 1     | 1     | 0   | 0     | 0     | 0   | 0   | 0    | 0   | 0    | 0    | 0    | 0    | 1    |
| C15H32      | kg/hr | 0   | 15   | 15   | 15   | 15   | 0     | 0   | 0     | 0   | 15    | 15    | 0   | 0     | 0     | 0   | 0   | 0    | 0   | 0    | 0    | 0    | 0    | 15   |
| C20H42      | kg/hr | 0   | 0    | 0    | 0    | 0    | 0     | 0   | 0     | 0   | 0     | 0     | 0   | 0     | 0     | 0   | 0   | 0    | 0   | 0    | 0    | 0    | 0    | 0    |
| C24H50      | kg/hr | 0   | 0    | 0    | 0    | 0    | 0     | 0   | 0     | 0   | 0     | 0     | 0   | 0     | 0     | 0   | 0   | 0    | 0   | 0    | 0    | 0    | 0    | 0    |
| 1-BUTENE    | kg/hr | 3   | 132  | 134  | 134  | 134  | 0     | 0   | 0     | 134 | 0     | 0     | 0   | 0     | 0     | 0   | 0   | 0    | 0   | 0    | 0    | 0    | 0    | 134  |
| BUTDIENE    | kg/hr | 0   | 2    | 2    | 2    | 2    | 0     | 0   | 0     | 2   | 0     | 0     | 0   | 0     | 0     | 0   | 0   | 0    | 0   | 0    | 0    | 0    | 0    | 2    |
| CO2         | kg/hr | 0   | 1    | 1    | 1    | 1    | 0     | 0   | 0     | 1   | 0     | 0     | 0   | 0     | 0     | 0   | 0   | 0    | 0   | 0    | 0    | 0    | 0    | 1    |
| CO          | kg/hr | 0   | 0    | 0    | 0    | 0    | 0     | 0   | 0     | 0   | 0     | 0     | 0   | 0     | 0     | 0   | 0   | 0    | 0   | 0    | 0    | 0    | 0    | 0    |
| O2          | kg/hr | 0   | 0    | 0    | 0    | 0    | 0     | 0   | 0     | 0   | 0     | 0     | 0   | 0     | 0     | 0   | 0   | 0    | 0   | 0    | 0    | 0    | 0    | 0    |
| SULFOLAN    | kg/hr | 0   | 0    | 0    | 0    | 0    | 8790  | 21  | 8811  | 0   | 8811  | 8811  | 0   | 8812  | 8790  | 2   | 2   | 20   | 20  | 0    | 0    | 0    | 0    | 21   |
| DMF         | kg/hr | 0   | 0    | 0    | 0    | 0    | 0     | 0   | 0     | 0   | 0     | 0     | 0   | 0     | 0     | 0   | 0   | 0    | 0   | 0    | 0    | 0    | 0    | 0    |

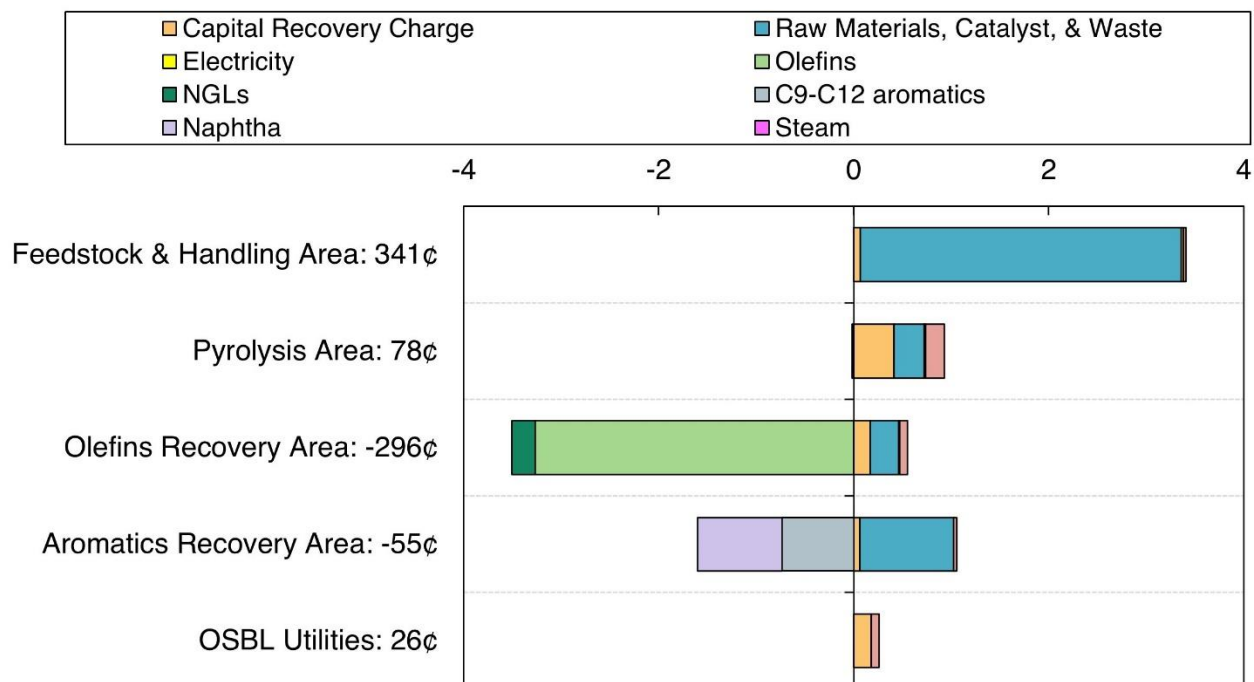

**Fig. S5.** Operating expense breakdown by process area (Case B – mixed product).

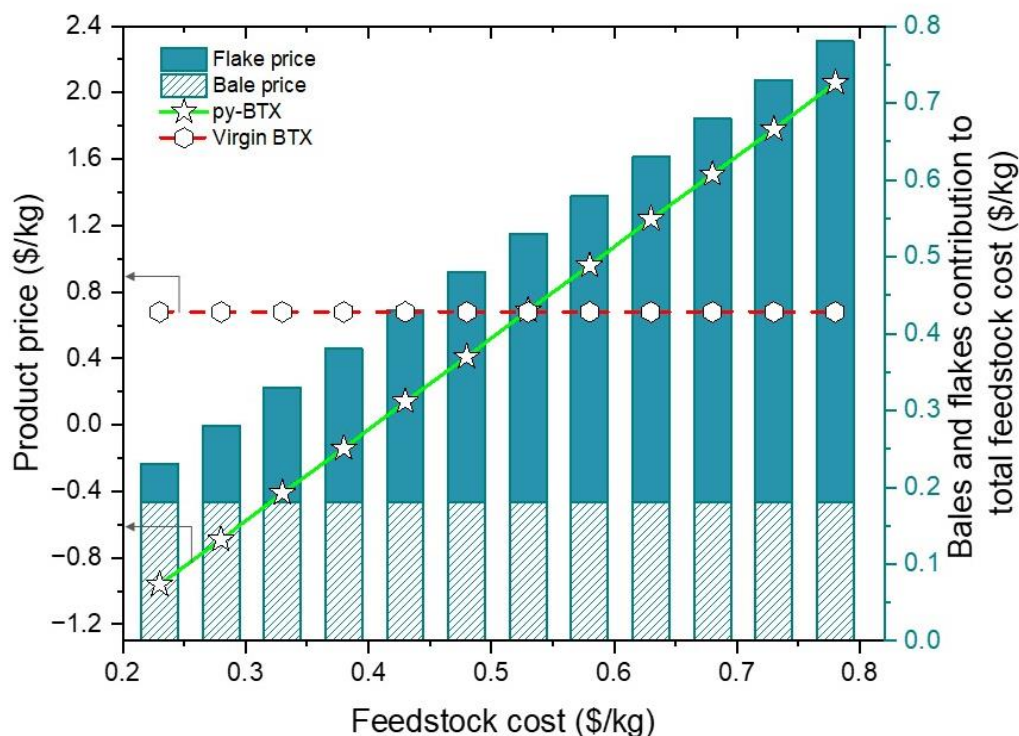

**Fig. S6.** MSP of BTX product as a function of feedstock cost, which is the total of the costs for plastic bales and flakes. Here, when the price of bales is fixed at \$0.18/kg, the effect of variations in the cost of flakes is seen on the overall MSP of BTX.

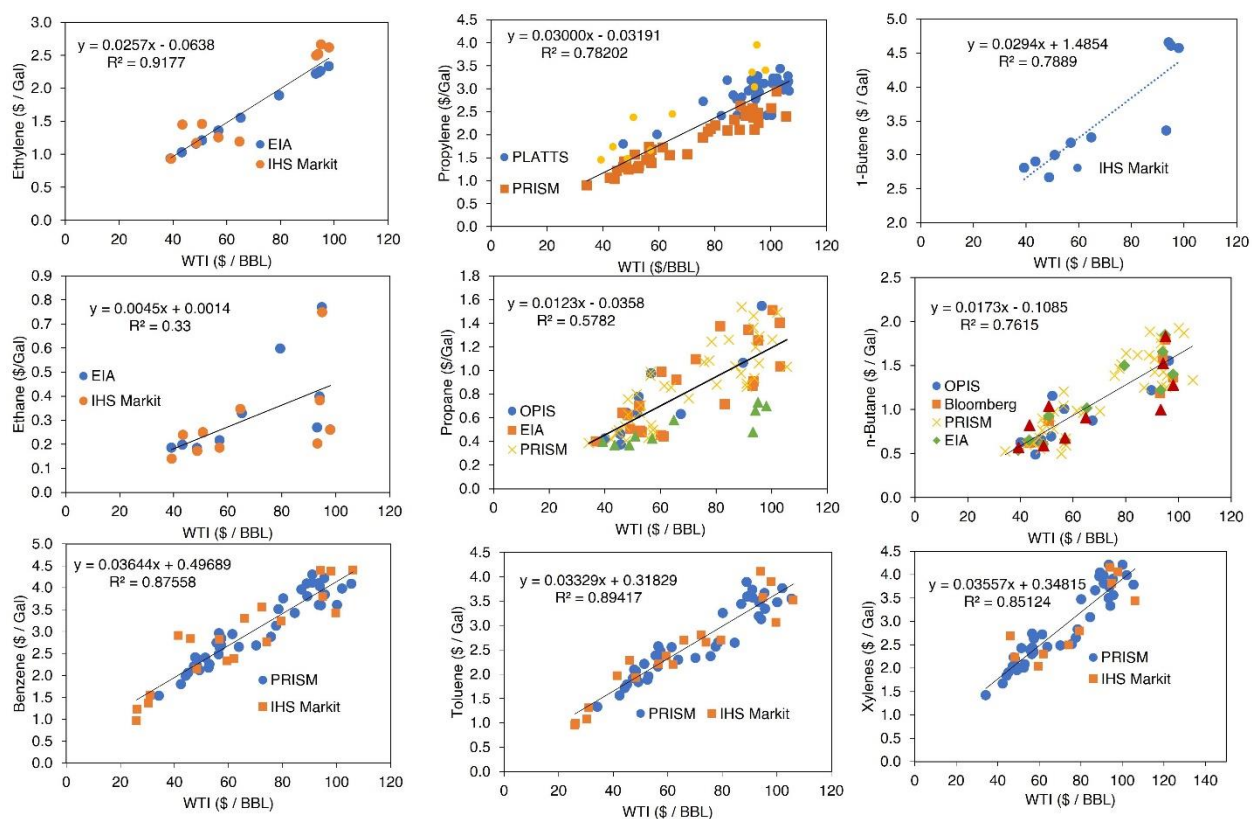

**Fig. S7.** Example of how product pricing values were determined based on historical WTI crude oil price. The data points used to develop the pricing equations represent snapshots derived from the open literature.<sup>1</sup> First, historical prices of WTI crude oil are plotted against the different petrochemical products. Then, linear regression is performed to obtain the slope and intercept values. These values are used to obtain the price of a particular petrochemical product at a designated WTI crude oil price as seen in **Fig. S8**.

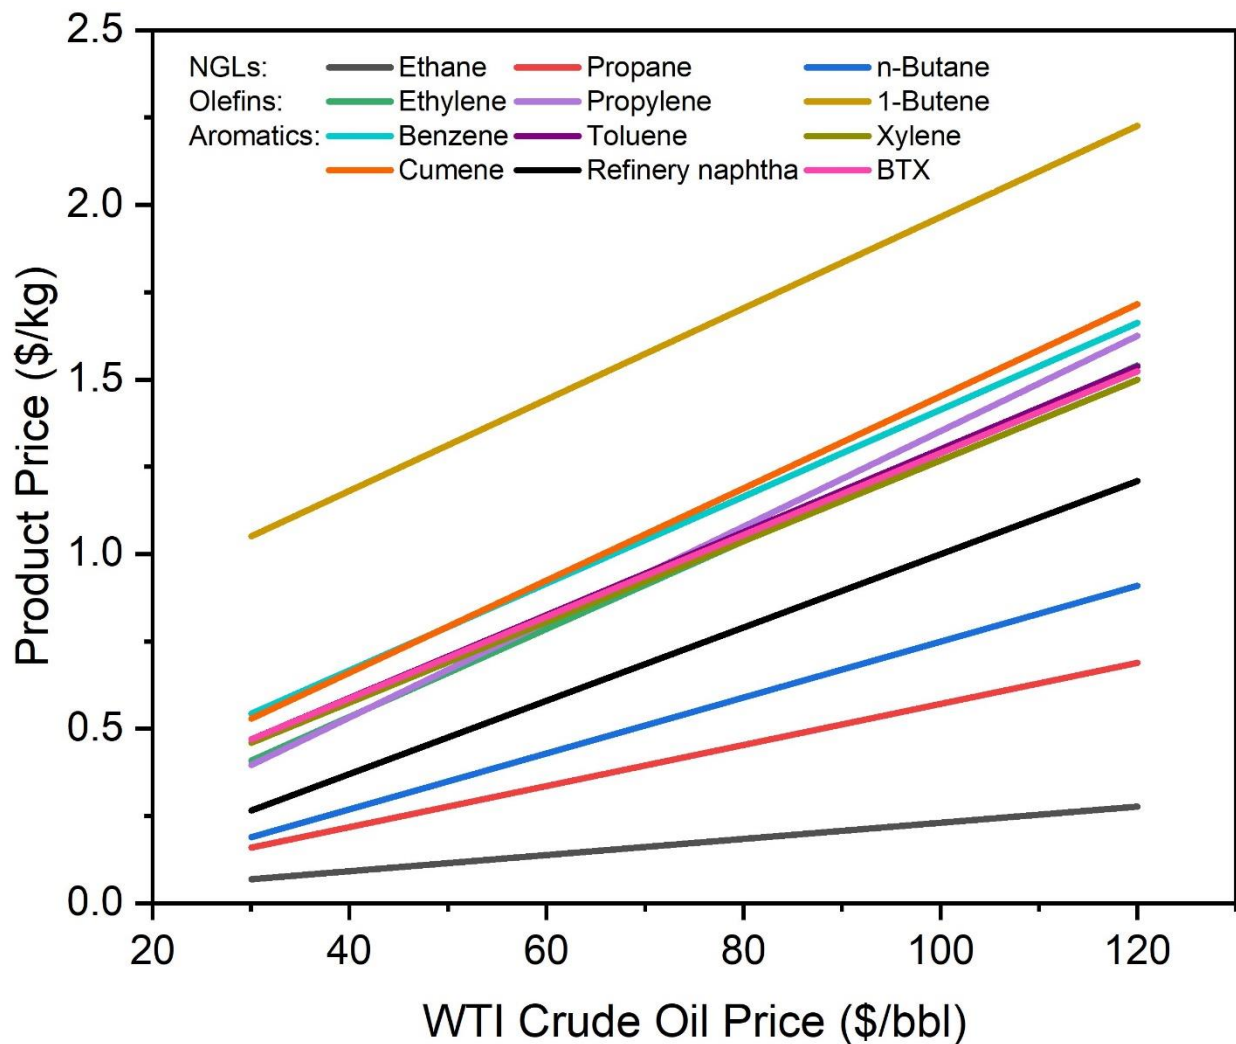

**Fig. S8.** Trends of price change of different products in this study vis-à-vis WTI crude oil price. The graph shows a comparison between trendlines for different products. These trendlines were obtained through the linear regression of historical price data for WTI crude oil and different petrochemical products from 2010 to 2020. WTI crude oil price varied from \$30/bbl to \$120/bbl.

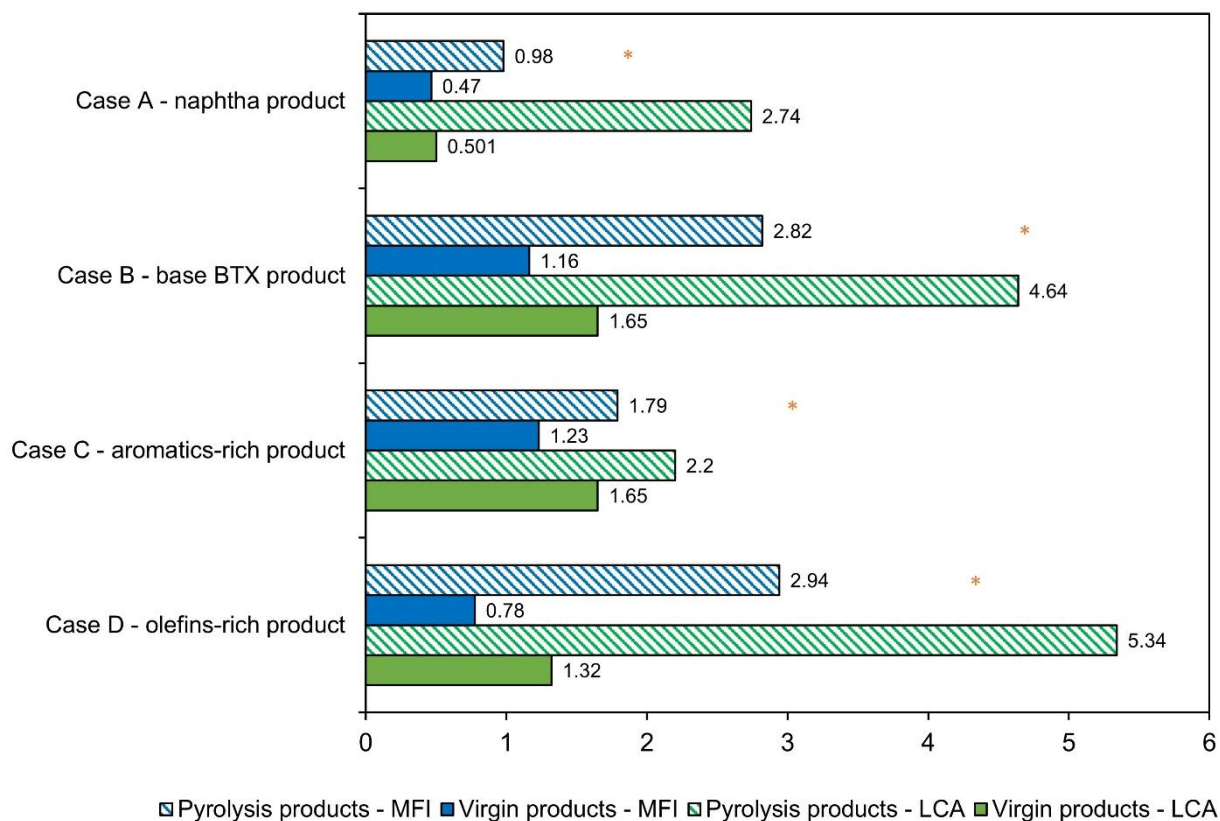

**Fig. S9.** Comparison of GHG emissions from the catalytic fast pyrolysis of mixed plastic wastes by MFI and LCA for Case A – naphtha product, Case B – mixed product, Case C – aromatics-rich product, and Case D – olefins-rich product. The differences between MFI and LCA results can be attributed to several factors. First, MFI does not consider process emissions arising from the pyrolysis reaction (0.88 kg CO<sub>2</sub>/kg naphtha for Case A, 1.85 kg CO<sub>2</sub>/kg BTX for Case B, 1.23 kg CO<sub>2</sub>/kg BTX for Case C, and 1.40 kg CO<sub>2</sub>/kg ethylene for Case D) or from virgin petrochemical manufacture (e.g., ~0.6-1.1 kg CO<sub>2</sub>/kg ethylene), resulting in lower GHG estimates. The MFI results would increase significantly upon inclusion of these stoichiometric emissions, as shown by the asterisk marks on the graph. Second, MFI and LCA use different background datasets. MFI models United States specific production pathways based on the latest industrial information from IHS Markit, whereas the ecoinvent database in LCA is typically generalized globally. The same process component (e.g., steam or electricity) or co-product (e.g., propylene or propane) will therefore have different GHG emissions on a per kilogram basis when estimated with MFI or LCA. This is particularly evident in Case C, which generates large quantities of co-products with different environmental impacts; LCA provides negative credits of 3.89 kg CO<sub>2</sub> eq/kg and 0.501 kg CO<sub>2</sub> eq/kg for cumene and naphtha, respectively, in comparison to 2.49 kg CO<sub>2</sub> eq/kg and 0.455 kg CO<sub>2</sub> eq/kg in MFI.



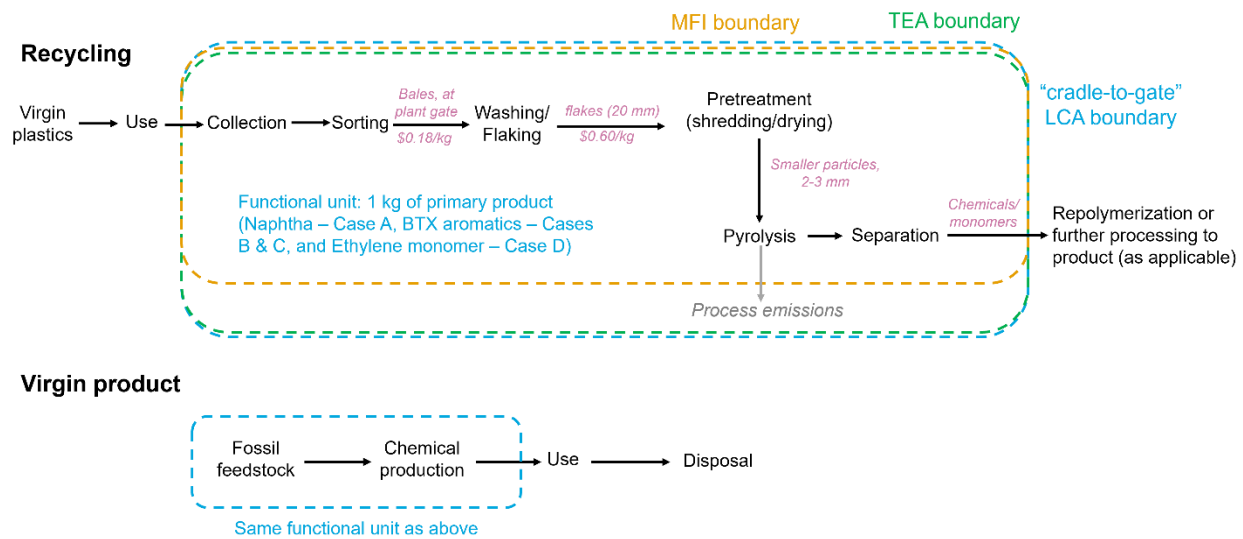

**Fig. S10.** MFI, LCA, and TEA system boundaries for the four catalytic fast pyrolysis-based mixed plastic waste recycling scenarios, as well as for the corresponding virgin materials (naphtha in Case A, BTX aromatic hydrocarbons in Cases B & C, and ethylene monomer in Case D).

**B. Supporting tables**

**Feedstock composition:** The typical composition of MPW stream globally consists of at least 70% polyolefins such as HDPE, LDPE, LLDPE, and PP.<sup>2-6</sup> In addition to these four polymers, MPW also contains co-mingled plastic types (1–7 resin identification code) in the form of bottles, films, containers, etc. In household applications, PET is primarily used in bottles, containers, textiles, and carpeting, while HDPE is used in injection/blow-molded bottles, containers, toys, pipe systems, etc. Post-consumer plastic waste contains more HDPE than PET because of higher production volumes of HDPE, different collection systems for bottles/beverage containers, and different methodologies for classification of plastics products from EPA (e.g., carpets and rugs are classified separately from plastics products). Combined, recycled PET and HDPE account for nearly 99% of the total bottles recycled. The feedstock is modeled here as being procured from a local MRF at \$0.18/kg as bales and converted to flakes at an additional price of \$0.42/kg with the composition shown in **Table S1**.

**Table S1.** Feedstock composition.<sup>7</sup>

| Component | Weight % (dry basis) |
|-----------|----------------------|
| HDPE      | 19%                  |
| LDPE      | 21%                  |
| LLDPE     | 18%                  |
| PP        | 24%                  |
| PS        | 11%                  |
| PET       | 3%                   |
| PVC       | 4%                   |
| Moisture  | <1%                  |

**Table S2.** Financial parameters used in discounted cash flow rate of return (DCFROR) analysis.

| Discounted Cash Flow Financial Parameters |                        |          |
|-------------------------------------------|------------------------|----------|
| Equity                                    | (% of FCI)             | 40%      |
| Loan Interest                             |                        | 8.0%     |
| Loan Term, years                          |                        | 10       |
| Working Capital                           | (% of FCI)             | 5.00%    |
| Discount Rate (IRR)                       |                        | 10%      |
| Income Tax Rate                           |                        | 21%      |
| Plant Depreciation Period                 | (Years)                | 7        |
| Plant Life                                | (Years)                | 30       |
| Construction Period                       | (Years)                | 3        |
| % Spent in Year -2                        |                        | 8%       |
| % Spent in Year -1                        |                        | 60%      |
| % Spent in Year 0                         |                        | 32%      |
| Start-up Time                             | (Years)                | 0.50     |
| BTX production year 1                     | (% of Normal Capacity) | 50%      |
| Variable Costs                            | (% of Normal)          | 75%      |
| Fixed Cost                                | (% of Normal)          | 100%     |
| Land Requirement                          | Acres                  | 10       |
| Land Cost                                 | \$/acre                | \$14,000 |

**Case A – Naphtha Product**

**Table S3.** Economic summary for naphtha production (Case A – naphtha product).

| <b>PRODUCTION OF NAPHTHA FROM THE PYROLYSIS OF MIXED PLASTICS WASTE</b> |                                     |                                        |                               |
|-------------------------------------------------------------------------|-------------------------------------|----------------------------------------|-------------------------------|
| Feed Pretreatment, Catalytic Fast Pyrolysis, and Phase Separation       |                                     |                                        |                               |
| All Values in 2016\$                                                    |                                     |                                        |                               |
| Minimum Naphtha Selling Price (MSP)                                     |                                     | \$2.18                                 | /kg                           |
| Contributions:                                                          | Feedstock                           | \$1.58                                 | /kg                           |
|                                                                         | Naphtha Conversion                  | \$0.60                                 | /kg                           |
|                                                                         | Naphtha Production                  | 34.3                                   | MMkg per year                 |
|                                                                         | Naphtha Yield                       | \$0.40                                 | Tonnes naphtha/tonne MPW feed |
|                                                                         | Feedstock + Handling Cost           | \$600                                  | /MT feedstock                 |
|                                                                         | Internal Rate of Return (After-Tax) | 10%                                    |                               |
|                                                                         | Equity Percent of Total Investment  | 40%                                    |                               |
| Capital Costs                                                           |                                     | Manufacturing Costs (cents/kg naphtha) |                               |
| A100: Feedstock Pretreatment                                            | \$4,161,035                         | Feedstock + Handling                   | 152                           |
| A200: Catalytic Fast Pyrolysis                                          | \$26,057,722                        | Catalyst cost                          | 6                             |
| A300: Pyrolysis Vapor Quench                                            | \$2,137,285                         | OSBL Utilities                         | 7.8                           |
| OSBL (25% of ISBL)                                                      | \$8,089,011                         | Electricity (import)                   | 2                             |
| Total Installed Equipment Cost                                          | \$40,445,053                        | Other Raw Materials                    | 0                             |
| Additional Direct Costs (17.5% of ISBL)                                 | \$5,662,307                         | Waste Disposal                         | 0.8                           |
| Total Direct Costs (TDC)                                                | \$46,107,360                        | Coproducts                             | 0                             |
| Land and Working Capital                                                | \$3,828,589                         | Fixed Costs                            | 18.7                          |
| Indirect Costs (60% of TDC)                                             | \$27,664,416                        | Capital Depreciation                   | 7.3                           |
| Total Capital Investment (TCI)                                          | \$77,600,365                        | Average Income Tax                     | 2.1                           |
|                                                                         |                                     | Average Return on Investment           | 21.6                          |
|                                                                         |                                     | Total                                  | 218.31                        |
|                                                                         |                                     | Manufacturing Costs (\$/yr)            |                               |
| Installed Equipment Cost/Annual kg                                      | \$1.18                              | Feedstock + Handling                   | \$52,100,000                  |
| Total Capital Investment/Annual kg                                      | \$2.26                              | Catalyst Cost                          | \$2,000,000                   |
|                                                                         |                                     | OSBL Utilities                         | \$2,700,000                   |
|                                                                         |                                     | Electricity (import)                   | \$700,000                     |
|                                                                         |                                     | Other Raw Materials                    | \$0                           |
|                                                                         |                                     | Waste Disposal                         | \$300,000                     |
|                                                                         |                                     | Coproducts                             | \$0                           |
| Operating Hours Per Year (On-Stream Factor)                             | 7884 (90%)                          | Fixed Costs                            | \$6,400,000                   |
| Loan Rate                                                               | 8%                                  | Capital Depreciation                   | \$2,500,000                   |
| Term (years)                                                            | 10                                  | Average Income Tax                     | \$700,000                     |
| Capital Charge Factor (Computed)                                        | 0.14                                | Average Return on Investment           | \$7,400,000                   |
|                                                                         |                                     | Total                                  | \$74,800,000                  |

**Case B – mixed product (base case with BTX aromatic hydrocarbons as principal product)**

**Total capital investment**

**Table S4.** Capital investment breakdown by process sections for the Case B – mixed product (base case). All costs are in USD.

| Equipment ID                    | Equipment Type                             | Installation Factor | Capital Cost (2016\$) |                   |
|---------------------------------|--------------------------------------------|---------------------|-----------------------|-------------------|
|                                 |                                            |                     | Equipment Cost*       | Installed Cost*   |
| <b>Feedstock Pretreatment</b>   |                                            |                     |                       |                   |
| CB-104                          | Heated screw conveyor                      | 1.82                | 107,000               | 195,000           |
| FH-110                          | Feed hopper/storage                        | 1.41                | 1,085,000             | 1,528,000         |
| CB-101                          | Feed conveyor                              | 1.85                | 109,000               | 201,000           |
| R-101                           | PVC dechlorination reactor                 | 4.01                | 270,000               | 1,171,000         |
| MT-130                          | HCl mixing tank                            | 5.50                | 17,000                | 107,000           |
| M-120                           | Shredder                                   | 1.70                | 140,000               | 238,000           |
| M-104A                          | Cross flow pellet dryer                    | 2.00                | 14,000                | 27,000            |
|                                 | Balance of plant                           |                     | 348,000               | 694,000           |
|                                 | <b>Feedstock pretreatment total (\$)</b>   |                     | <b>2,091,000</b>      | <b>4,161,000</b>  |
| <b>Catalytic Fast Pyrolysis</b> |                                            |                     |                       |                   |
| R-201                           | Fluidized bed reactor                      | 4.00                | 3,492,000             | 13,970,000        |
| R-202                           | Char combustor                             | 3.97                | 51,000                | 202,000           |
| K-202                           | Combustor air compressor                   | 1.60                | 284,000               | 454,000           |
| K-201                           | Fluidizing gas recycle compressor          | 1.60                | 422,000               | 675,000           |
| R-202C                          | Catalyst cooler                            | 3.00                | 588,000               | 1,764,000         |
| T-201                           | Catalyst steam stripper                    | 3.00                | 411,000               | 1,232,000         |
| R-203                           | Fired heater                               | 1.31                | 1,314,000             | 4,005,000         |
|                                 | Balance of plant                           |                     | 2,291,930             | 8,005,561         |
|                                 | <b>Catalytic Fast Pyrolysis Total (\$)</b> |                     | <b>7,881,573</b>      | <b>24,030,630</b> |
| <b>Phase Separation</b>         |                                            |                     |                       |                   |
| E-301                           | Reactor effluent cooler                    | 2.03                | 76,000                | 154,000           |
| E-302                           | Reactor effluent cooler                    | 2.00                | 149,000               | 250,527           |
| E-303                           | Reactor effluent cooler                    | 2.00                | 40,000                | 81,000            |
| T-304                           | 2-phase flash vessel (V/L)                 | 4.99                | 225,000               | 1,122,000         |

|           |                                    |      |                |                  |
|-----------|------------------------------------|------|----------------|------------------|
| D-305     | Naphtha column                     | 2.13 | 104,000        | 221,000          |
|           | Balance of Plant                   |      | 119,000        | 375,000          |
|           | <b>Phase separation total (\$)</b> |      | <b>713,000</b> | <b>2,251,000</b> |
|           | <b>Olefins separation</b>          |      |                |                  |
| K-401     | Compressor                         | 2.15 | 1,469,000      | 2,351,000        |
| E-401     | Cooler                             | 3.23 | 16,000         | 52,000           |
| D-401     | Naphtha column                     | 2.77 | 63,000         | 175,000          |
| E-402     | Recycle cooler                     | 3.23 | 1,000          | 4,000            |
| T-401     | Demethanizer                       | 1.91 | 259,000        | 517,000          |
| T-401C    | T-410C – Demethanizer-condenser    | 4.58 | 1,000          | 4,000            |
| T-401B    | T-410B – Demethanizer-reboiler     | 2.83 | 13,000         | 36,000           |
| T-402     | Deethanizer column                 | 1.60 | 240,000        | 410,000          |
| T-401C    | T-402C – Condenser (startup)       | 4.58 | 3,000          | 15,000           |
| T-402B    | T-402C – Reboiler (startup)        | 2.83 | 11,000         | 30,000           |
| D-403     | C2 splitter                        | 1.91 | 256,000        | 424,000          |
| D-403C    | D-403C – Condenser (startup)       | 6.66 | 7,000          | 46,000           |
| D-403B    | D-403B – Reboiler (startup)        | 2.83 | 15,000         | 41,000           |
| T-404     | Depropanizer                       | 2.15 | 162,000        | 303,000          |
| T-404C    | T-404C – Condenser (startup)       | 4.58 | 8,000          | 37,000           |
| T-404B    | T-404C – Reboiler (startup)        | 2.83 | 25,000         | 70,000           |
| D-405     | C3 fractionator                    | 1.91 | 1,113,000      | 1,446,000        |
| D-405C    | D-405C – Condenser (startup)       | 6.66 | 29,000         | 192,000          |
| D-405B    | D-405C – Reboiler (startup)        | 2.83 | 62,000         | 174,000          |
| T-406     | Debutanizer                        | 1.91 | 75,000         | 197,000          |
| T-406     | T-406C – Condenser (startup)       | 4.58 | 5,000          | 24,000           |
| T-406     | T-406C – Reboiler (startup)        | 2.83 | 13,000         | 35,000           |
| K-402     | Compressor                         | 2.15 | 109,000        | 234,000          |
| C2REC     | Heat exchanger                     | 3.17 | 69,000         | 218,000          |
| Chiller-5 | Refrigeration cooler               | 3.23 | 12,000         | 40,000           |
| Chiller-1 | Refrigeration cooler               | 3.23 | 45,000         | 145,000          |
| Chiller-2 | Refrigeration cooler               | 3.23 | 15,000         | 47,000           |

|           |                                      |      |                  |                   |
|-----------|--------------------------------------|------|------------------|-------------------|
| Chiller-3 | Refrigeration cooler                 | 3.23 | 4,000            | 12,000            |
| Chiller-4 | Refrigeration cooler                 | 3.23 | 1,000            | 3,000             |
| V-401     | Vapor KO drum                        | 3.45 | 1,000            | 4,000             |
| V-402     | Vapor KO drum                        | 3.45 | 1,000            | 3,000             |
| V-403     | Vapor KO drum                        | 3.45 | 1,000            | 2,500             |
| CB1       | BAHX- Heat exchanger                 | 4.58 | 77,000           | 243,000           |
| CB2       | BAHX- Heat exchanger                 | 4.58 | 69,000           | 218,000           |
| CB3       | BAHX- Heat exchanger                 | 4.58 | 64,000           | 204,000           |
| E-403     | Cooler                               | 3.23 | 8,000            | 26,000            |
| T-407     | Extractive distillation column       | 1.19 | 405,000          | 482,000           |
| T-407C    | T-407 Condenser (startup)            | 4.58 | 46               | 210               |
| T-407B    | T-407 Reboiler (startup)             | 2.83 | 16,000           | 45,000            |
| D-408     | Stripper                             | 1.69 | 126,000          | 171,000           |
| D-408C    | D-408 Condenser (startup)            | 4.58 | 3,000            | 13,000            |
| D-408B    | D-408 Reboiler (startup)             | 2.83 | 4,000            | 10,000            |
|           | Balance of plant                     | 0.35 | 1,462,000        | 1,473,000         |
|           | <b>Olefins separation total (\$)</b> |      | <b>6,333,000</b> | <b>10,179,000</b> |
|           | <b>Aromatics Extraction</b>          |      |                  |                   |
| D-501     | Extractive distillation column       | 1.69 | 338,000          | 571,000           |
| D-501C    | D-501 Condenser (startup)            | 4.58 | 3,000            | 15,000            |
| D-501B    | D-501 Reboiler (startup)             | 2.83 | 17,000           | 50,000            |
| T-502     | Wash column                          | 2.00 | 4,000            | 8,000             |
| D-503     | Solvent stripper                     | 2.27 | 104,000          | 237,000           |
| D-503C    | D-503 Condenser (startup)            | 6.66 | 21,000           | 142,000           |
| D-503B    | D-503 Reboiler (startup)             | 2.83 | 56,000           | 158,000           |
| D-504     | Decanter                             | 1.82 | 3,000            | 6,000             |
| E-501     | Cooler                               | 3.23 | 49,000           | 159,000           |
| E-502     | Heater                               | 3.23 | 72,000           | 232,000           |
| E-503     | Cooler                               | 3.23 | 111,000          | 359,000           |
| E-504     | Cooler                               | 3.23 | 2,000            | 5,000             |
| T-504     | Cumene column                        | 1.42 | 564,000          | 801,000           |

|        |                                              |      |                   |                    |
|--------|----------------------------------------------|------|-------------------|--------------------|
| T-504C | T-504C condenser                             | 6.66 | 12,000            | 82,000             |
| T-504B | T-504B Reboiler                              | 2.83 | 29,000            | 81,000             |
|        | Balance of plant                             | 0.3  | 416,000           | 872,000            |
|        | <b>Aromatics recovery total (\$)</b>         |      | <b>1,802,000</b>  | <b>3,777,000</b>   |
|        | OSBL                                         |      |                   |                    |
|        | Outside battery limits capital (25% of ISBL) |      | 4,800,000         | 11,200,000         |
|        | OSBL total (\$)                              |      | 4,800,000         | 11,200,000         |
|        | <b>TOTAL (\$)</b>                            |      | <b>23,900,000</b> | <b>55,900,000</b>  |
|        | <b>Total Direct Costs (TDC)</b>              |      |                   | <b>63,700,000</b>  |
|        | <b>Total Indirect Costs</b>                  |      |                   | <b>38,300,000</b>  |
|        | <b>Fixed Capital Investment (FCI)</b>        |      |                   | <b>101,800,000</b> |
|        | <b>Total Capital Investment (TCI)</b>        |      |                   | <b>107,000,000</b> |

\*These values are rounded off to the nearest integer.

**Table S5.** CAPEX breakdown for the base case, related to **Fig. 4a** from main text.

| <b>Process Section</b>      | <b>\$M</b>  | <b>% TIC</b> |
|-----------------------------|-------------|--------------|
| Feedstock Pretreatment      | 4.2         | 7%           |
| Catalytic Fast Pyrolysis    | 24.0        | 43%          |
| Pyrolysis Vapor Quench      | 2.3         | 4%           |
| Olefins Separation          | 10.4        | 19%          |
| Aromatics Separation        | 3.8         | 7%           |
| OSBL                        | 11.2        | 20%          |
| <b>Total Installed Cost</b> | <b>55.8</b> | <b>100%</b>  |

**Table S6.** Cost factors for indirect costs.

| <b>Indirect Costs</b>                  | <b>% of TDC</b> |
|----------------------------------------|-----------------|
| Prorated expenses                      | 10.0            |
| Field expenses                         | 10.0            |
| Home office and construction fee       | 20.0            |
| Project contingency                    | 10.0            |
| Other costs (start-ups, Permits, etc.) | 10.0            |
| <b>Total Indirect Costs</b>            | <b>60.0</b>     |

\*Excluding land purchase cost



**Table S7.** Annual operating cost by process section for the base case, related to **Fig. 4b** in the main text.

| <b>Process Area</b>      | <b>Yearly Operating Expenses Breakdown (\$M/year)</b> |                 |                          |                |                    |                    |                    |              |
|--------------------------|-------------------------------------------------------|-----------------|--------------------------|----------------|--------------------|--------------------|--------------------|--------------|
|                          | <b>Feedstock</b>                                      | <b>Catalyst</b> | <b>Operational Costs</b> | <b>Solvent</b> | <b>Electricity</b> | <b>Co-products</b> | <b>Fixed Costs</b> | <b>Total</b> |
| Feedstock Pre-processing | 52.14                                                 | 0.00            | 0.40                     | 0.00           | 0.32               | 0.00               | 0.00               | 52.86        |
| Catalytic Fast Pyrolysis | 0.00                                                  | 2.05            | 0.05                     | 0.00           | 0.27               | -0.27              | 0.00               | 2.10         |
| Phase Separation         | 0.00                                                  | 0.00            | 1.04                     | 0.00           | 0.00               | 0.00               | 0.00               | 1.04         |
| Olefins Separation       | 0.00                                                  | 0.00            | 4.05                     | 0.01           | 0.21               | -55.55             | 0.00               | -51.29       |
| Aromatics Separation     | 0.00                                                  | 0.00            | 4.04                     | 10.94          | 0.00               | -25.40             | 0.00               | -10.43       |
| Fixed Costs              | 0.00                                                  | 0.00            | 0.00                     | 0.00           | 0.00               | 0.00               | 8.76               | 8.76         |
| <b>Total</b>             | <b>52.14</b>                                          | <b>2.05</b>     | <b>9.58</b>              | <b>10.94</b>   | <b>0.81</b>        | <b>-81.22</b>      | <b>8.76</b>        | <b>3.05</b>  |

**Table S8.** Basis of product and co-product's application, annual global consumption (in million metric tons), and pricing.<sup>8-11</sup>

| <b>Products and co-products</b> | <b>Application/use</b> | <b>Global consumption (MM metric tons)</b> | <b>Price (\$/kg)</b> | <b>Pricing Justifications</b>                                                                          |
|---------------------------------|------------------------|--------------------------------------------|----------------------|--------------------------------------------------------------------------------------------------------|
| BTX aromatic hydrocarbons       | plastics               | 150                                        | 0.68                 | As blends of fuels to boost octane number or as petrochemical material                                 |
| Naphtha                         | fuel                   | 341                                        | 0.38                 | To replace crude oil-based naphtha                                                                     |
| Ethylene                        | plastics               | 174.5                                      | 0.58                 | For making plastics (HDPE, LDPE)                                                                       |
| Propylene                       | plastics               | 120.8                                      | 0.83                 | For making plastics (HDPE, LDPE)                                                                       |
| Butene                          | plastics               | 53.8                                       | 1.27                 | For making plastics (HDPE, LDPE)                                                                       |
| Ethane                          | refrigerant            | 100                                        | 0.17                 | As a working fluid in the refrigeration cycle of air conditioning systems and heat pumps               |
| Propane                         | fuel                   | 68                                         | 0.33                 | Used as fuel for cooking, engine applications                                                          |
| Butane                          | fuel                   | 26                                         | 0.36                 | Fuel for portable stoves, heating fuel, refrigerant                                                    |
| Other aromatics (mainly cumene) | plastics               | 16.4                                       | 0.64                 | Chemical intermediate in the production of phenol and acetone, which are in turn used to make plastics |

**Table S9.** Economic summary for BTX aromatics production in the base case (Case B – mixed product).

| <b>PRODUCTION OF BTX AROMATICS FROM THE CATALYTIC PYROLYSIS OF MIXED PLASTICS WASTE</b>                             |                                       |                                           |                         |
|---------------------------------------------------------------------------------------------------------------------|---------------------------------------|-------------------------------------------|-------------------------|
| <b>Feed Pretreatment, Catalytic Fast Pyrolysis and Phase Separation, Olefins Recovery, and Aromatics Extraction</b> |                                       |                                           |                         |
| <b>All Values in 2016\$</b>                                                                                         |                                       |                                           |                         |
| Minimum BTX Selling Price (MSP)                                                                                     |                                       | <b>\$1.07</b>                             | <b>/kg</b>              |
| Contributions:                                                                                                      | Feedstock                             | <b>\$3.42</b>                             | <b>/kg</b>              |
|                                                                                                                     | BTX Conversion                        | <b>\$2.76</b>                             | <b>/kg</b>              |
|                                                                                                                     | Olefins Co-product Conversion         | <b>\$-3.27</b>                            | <b>/kg</b>              |
|                                                                                                                     | Naphtha Co-product Conversion         | <b>\$-0.87</b>                            | <b>/kg</b>              |
|                                                                                                                     | NGLs Co-product Conversion            | <b>\$-0.24</b>                            | <b>/kg</b>              |
|                                                                                                                     | Other Aromatics Co-product Conversion | <b>\$-0.73</b>                            | <b>/kg</b>              |
|                                                                                                                     | BTX Production                        | 15.83                                     | MMkg per year           |
|                                                                                                                     | BTX Yield                             | 0.20                                      | tonnes BTX/tonne MPW    |
|                                                                                                                     | Olefins Co-product Production         | 25.26                                     | MMkg per year           |
|                                                                                                                     | Olefins Co-product Yield              | 0.32                                      | tonnes / tonne MPW feed |
|                                                                                                                     | Naphtha Co-product Production         | 16.35                                     | MMkg per year           |
|                                                                                                                     | Naphtha Co-product Yield              | 0.21                                      | tonnes / tonne MPW feed |
|                                                                                                                     | NGLs Co-product Production            | 5.32                                      | MMkg per year           |
|                                                                                                                     | NGLs Co-product Yield                 | 0.07                                      | tonnes /tonne MPW feed  |
|                                                                                                                     | Other Aromatics Co-product Production | 8.15                                      | MMkg per year           |
|                                                                                                                     | Other Aromatics Co-product Yield      | 0.10                                      | tonnes /tonne MPW feed  |
|                                                                                                                     | Feedstock + Handling Cost             | \$600                                     | / MT feedstock          |
|                                                                                                                     | Internal Rate of Return (After-Tax)   | 10%                                       |                         |
|                                                                                                                     | Equity Percent of Total Investment    | 40%                                       |                         |
| <b>Capital Costs</b>                                                                                                |                                       | <b>Manufacturing Costs (cents/kg BTX)</b> |                         |
| A100: Feedstock Pretreatment                                                                                        | \$4,161,035                           | Feedstock + Handling                      | 329.4                   |
| A200: Catalytic Fast Pyrolysis                                                                                      | \$24,030,630                          | Catalyst cost                             | 12.9                    |
| A300: Pyrolysis Vapor Quench                                                                                        | \$2,250,946                           | OSBL Utilities                            | 54.1                    |
| A400: Olefins Separation                                                                                            | \$10,424,021                          | Electricity (import)                      | 5.1                     |
| A500: Aromatics Separation                                                                                          | \$3,777,442                           | Other Raw Materials                       | 73.0                    |
| OSBL (25% of ISBL)                                                                                                  | \$11,161,018                          | Waste Disposal                            | 2.5                     |
| Total Installed Equipment Cost                                                                                      | \$55,805,092                          | Coproducts                                | -513.1                  |
| Additional Direct Costs (17.5% of ISBL)                                                                             | \$7,812,713                           | Fixed Costs                               | 55.3                    |
| Total Direct Costs (TDC)                                                                                            | \$63,617,805                          | Capital Depreciation                      | 21.5                    |
| Land and Working Capital                                                                                            | \$5,229,424                           | Average Income Tax                        | 6.5                     |
| Indirect Costs (60% of TDC)                                                                                         | \$38,170,683                          | Average Return on Investment              | 59.8                    |
| Total Capital Investment (TCI)                                                                                      | \$107,017,912                         | Total                                     | 107.1                   |
|                                                                                                                     |                                       | <b>Manufacturing Costs (\$/yr)</b>        |                         |
| Installed Equipment Cost/Annual kg                                                                                  | \$3.53                                | Feedstock + Handling                      | \$52,100,000            |
| Total Capital Investment/Annual kg                                                                                  | \$6.76                                | Catalyst Cost                             | \$2,000,000             |
|                                                                                                                     |                                       | OSBL Utilities                            | \$8,600,000             |
|                                                                                                                     |                                       | Electricity (import)                      | \$800,000               |
|                                                                                                                     |                                       | Other Raw Materials                       | \$11,600,000            |
| Operating Hours Per Year (On-Stream Factor)                                                                         | 7,884 (90%)                           | Waste Disposal                            | \$400,000               |
| Loan Rate                                                                                                           | 8%                                    | Coproducts                                | \$81,200,000            |
| Term (years)                                                                                                        | 10                                    | Fixed Costs                               | \$8,800,000             |
| Capital Charge Factor (Computed)                                                                                    | 0.13                                  | Capital Depreciation                      | \$3,400,000             |
|                                                                                                                     |                                       | Average Income Tax                        | \$1,000,000             |
|                                                                                                                     |                                       | Average Return on Investment              | \$9,500,000             |
|                                                                                                                     |                                       | Total                                     | \$17,000,000            |

**Table S10.** Salary cost for plant employees.

| <b>Position</b>                   | <b>Salary (2016)</b>  | <b>Number of Positions</b> | <b>Total Cost (2016)</b> |
|-----------------------------------|-----------------------|----------------------------|--------------------------|
| Plant Manager                     | 147,000               | 1                          | 147,000                  |
| Plant Engineer                    | 70,000                | 1                          | 70,000                   |
| Maintenance Supervisor            | 57,000                | 1                          | 57,000                   |
| Maintenance Technician            | 40,000                | 6                          | 240,000                  |
| Lab Manager                       | 56,000                | 1                          | 56,000                   |
| Laboratory Technician             | 40,000                | 1                          | 40,000                   |
| Shift Supervisor                  | 48,000                | 3                          | 144,000                  |
| Shift Operators                   | 40,000                | 12                         | 480,000                  |
| Yard Employees                    | 28,000                | 4                          | 112,000                  |
| Clerks & Secretaries              | 36,000                | 1                          | 36,000                   |
| <b>Total Salaries (2016\$/yr)</b> |                       |                            | <b>1,382,000</b>         |
| Labor Burden                      | 90% of Total Salaries |                            | 1,243,800                |
|                                   |                       |                            | <b>2,625,000</b>         |

Note: Labor costs are indexed, if necessary, to values from the U.S. Bureau of Labor Statistics (<http://data.bls.gov/cgi-bin/srgate> CEU3232500008).

**Table S11.** Fixed operating costs.

| <b>Cost Item</b>                   | <b>Factor</b>                           | <b>Total Cost (2016) \$</b> |
|------------------------------------|-----------------------------------------|-----------------------------|
| Labor Burden                       | 90% of Total Salaries                   | 1,244,000                   |
| Overhead and Benefits              | 90% of Labor and Supervision            | 2,363,000                   |
| Maintenance                        | 3.0% of fixed capital investment (FCI*) | 3,054,000                   |
| Property Insurance and Tax         | 0.7% of fixed capital investment (FCI*) | 713,000                     |
| <b>Total Fixed Operating Costs</b> |                                         | <b>7,374,000</b>            |

\*Percentage of FCI exclude land purchase cost

**Table S12.** Operating costs and summary of variable operating cost additions.

| Component                    | Cost (2016\$)                                                | Source                                                                                                        |
|------------------------------|--------------------------------------------------------------|---------------------------------------------------------------------------------------------------------------|
| Mixed Plastic Waste          | \$0.60/kg                                                    | RecyclingMarkets.net <sup>8</sup>                                                                             |
| Sulfolane                    | \$63.8/kg                                                    | Industry database <sup>9</sup>                                                                                |
| Dimethyl formamide           | \$0.81/kg                                                    | PEP Year Handbook <sup>10</sup>                                                                               |
| Steam                        | HP: \$17.6/1000 kg, MP: \$15.3/1000 kg<br>LP: \$13.2/1000 kg | Seider <i>et al.</i> 2017 Textbook <sup>11</sup>                                                              |
| Natural Gas                  | \$0.26/kg (\$5/MMBtu)                                        | Dutta <i>et al.</i> 2015 Design Report <sup>12</sup>                                                          |
| Process Water                | \$0.27/m <sup>3</sup>                                        | Seider <i>et al.</i> 2017 Textbook <sup>11</sup>                                                              |
| Cooling Water                | Inlet: 25 °C; Outlet: 30 °C                                  | Calculated based on volumetric flow (m <sup>3</sup> /s) as described in Ulrich and Vasudevan <sup>13</sup>    |
| 62.5% Spent FCC Catalyst     | \$2.98/kg (includes catalyst recovery cost)                  | CatCost Estimate <sup>14</sup>                                                                                |
| 37.5% ZSM-5 Zeolite Catalyst | \$2.98/kg (includes catalyst recovery cost)                  | CatCost Estimate <sup>14</sup>                                                                                |
| Refrigerants                 | Temperature: -102°C, -40.03°C, -18°C, -7°C                   | Calculated based on cooling capacity (kJ/s) of refrigerant as described in Ulrich and Vasudevan <sup>13</sup> |
| Electricity                  | \$0.068/kWh                                                  | Seider <i>et al.</i> <sup>11</sup>                                                                            |

**Table S13.** Simplified breakdown of the MSP of BTX in the base case (Case B – mixed product), related to **Fig. 4c** in the main text.

| Cost Category        | Cost Contribution (\$/kg <sub>BTX</sub> ) |
|----------------------|-------------------------------------------|
| Feedstock Cost       | 3.29                                      |
| Catalyst cost        | 0.13                                      |
| OSBL Utilities       | 0.54                                      |
| Electricity Cost     | 0.05                                      |
| Other raw materials  | 0.73                                      |
| Other Operating Cost | 0.63                                      |
| Fixed Cost           | 0.55                                      |
| Capital Charge       | 0.27                                      |
| Co-product Credits   | -5.13                                     |
| <b>MSP</b>           | <b>1.07</b>                               |

**Table S14.** Minimum selling price of BTX by process section for the base case (Case B – mixed product), related to **Fig. 4c**.

| Process Area             | Cost Category (\$/kg BTX) |             |                   |                |             |             |              |             |
|--------------------------|---------------------------|-------------|-------------------|----------------|-------------|-------------|--------------|-------------|
|                          | Feedstock                 | Catalyst    | Operational Costs | Capital Charge | Solvent     | Electricity | Co-products  | Total       |
| Feedstock Pre-processing | 3.29                      | 0.00        | 0.04              | 0.07           | 0.00        | 0.02        | 0.00         | 3.42        |
| Catalytic Fast Pyrolysis | 0.00                      | 0.13        | 0.27              | 0.38           | 0.00        | 0.02        | -0.02        | 0.77        |
| Pyrolysis Vapor Quench   | 0.00                      | 0.00        | 0.09              | 0.04           | 0.00        | 0.00        | 0.00         | 0.12        |
| Olefins Separation       | 0.00                      | 0.00        | 0.36              | 0.164          | 0.00        | 0.01        | -3.51        | -2.97       |
| Aromatics Separation     | 0.00                      | 0.00        | 0.29              | 0.06           | 0.69        | 0.00        | -1.60        | -0.56       |
| OSBL                     | 0.00                      | 0.00        | 0.11              | 0.18           | 0.00        | 0.00        | 0.00         | 0.29        |
| <b>Total</b>             | <b>3.29</b>               | <b>0.13</b> | <b>1.16</b>       | <b>0.88</b>    | <b>0.69</b> | <b>0.05</b> | <b>-5.13</b> | <b>1.07</b> |

## Selection of sensitivity analysis parameters

**Table S15.** Rationale for choosing the low and high values for the univariate sensitivity analysis, related to **Fig. 5a** in the main text.

| Sensitivity Analysis Parameter<br>(Best case*: Base Case: Worst Case) | Justification for the high and low values of parameters                                                                                                                                                                                                                                                                                                                                                                                                              |
|-----------------------------------------------------------------------|----------------------------------------------------------------------------------------------------------------------------------------------------------------------------------------------------------------------------------------------------------------------------------------------------------------------------------------------------------------------------------------------------------------------------------------------------------------------|
| Feedstock Cost (\$/kg)<br>0.5: 0.6: 0.7                               | <p><b>Best case:</b> Lower cost sources of polyolefins such as films and flexibles that are currently discarded.</p> <p><b>Base case:</b> Based on RecyclingMarkets.net estimates for the price of mixed plastics waste (bales) and its conversion to flakes. Feedstock contains at least 80% polyolefins.</p> <p><b>Worst case:</b> Poor sorting (at MRF) and collection (from municipalities) scenario for the typical feedstock composition of the base case.</p> |
| Downstream Capital (%)<br>0: base: +100                               | <p><b>Best case:</b> No capital investment for products separation due to integration in existing petroleum refineries.</p> <p><b>Base case:</b> greenfield plant</p> <p><b>Worst case:</b> Uncertainty in capital expenditure</p>                                                                                                                                                                                                                                   |
| Internal Rate of Return (%)<br>5: 10: 15                              | <p><b>Best case:</b> Low risk investment assuming the technology is mature with well-established markets for the different products and co-products.</p> <p><b>Base case:</b> The standard discount rate for medium risk projects.</p> <p><b>Worst case:</b> High risk projects with new products yet to find a niche in market.</p>                                                                                                                                 |
| Operating Cost (M\$)<br>(-22%, base, +22%)                            | <p><b>Best case:</b> Energy integration leads to lower utilities usage causing a drop in operating expenses.</p> <p><b>Base case:</b> Standard separation approaches for olefins and aromatics.</p> <p><b>Worst case:</b> Reflects potential underestimation of auxiliary utilities to the plant.</p>                                                                                                                                                                |
| Sulfolane cost (\$/kg)<br>43.8: 63.8: 81.4                            | <p><b>Best case:</b> 99.9% purity (0.07% water). Extractive distillation solvent, polymerization solvent.</p> <p><b>Base case:</b> 97.1% purity (2.9% water). Extraction of aromatic hydrocarbons from oil refinery stream.</p> <p><b>Worst case:</b> 97.1% purity (2.9% water) for use as plasticizer and curing agent.</p>                                                                                                                                         |
| CFP reactor cost (%)<br>-20, base, +40                                | <p><b>Best case:</b> Mature technology.</p> <p><b>Base case:</b> Based on product mass flows designed for fluidized bed reactor technology.</p> <p><b>Worst case:</b> Uncertainty in capital cost estimation of the pyrolysis reactor, as capital cost is often underestimated for emerging technologies.</p>                                                                                                                                                        |
| Catalyst loading (%)<br>1: 6: 12                                      | <p><b>Best case:</b> For aromatics yield improvement (tradeoff with olefins)</p> <p><b>Base case:</b> For olefins and aromatics production.</p> <p><b>Worst case:</b> For olefins yield improvement (tradeoff with aromatics).</p>                                                                                                                                                                                                                                   |
| Plant size (tpd)<br>500: 240: 100                                     | <p><b>Best case:</b> Modular design enable the installation of multiple units and benefits from economies-of-scale.</p> <p><b>Base case:</b> Size of a typical commercial scale pyrolysis plant in operation to-date (e.g., Ensyn, Brightmark).</p> <p><b>Worst case:</b> Typical size of demonstration plants.</p>                                                                                                                                                  |
| Catalyst cost (\$/kg)<br>2.43: 2.98: 6.75                             | <p><b>Best case:</b> Step method – uses costs in \$/hr for synthesis steps run at a contract manufacturer.</p> <p><b>Base case:</b> CapEx &amp; OpEx Factors method – uses process design literature for a dedicated, new build catalyst plant.</p> <p><b>Worst case:</b> ZSM-5 with rare earth metals.</p>                                                                                                                                                          |
| Time on stream (%)<br>94: 90: 86                                      | <p><b>Best case:</b> 343 days of plant operation (22 days for maintenance).</p> <p><b>Base case:</b> 328.5 days of plant operation (36.5 days for maintenance).</p> <p><b>Worst case:</b> 314 days of plant operation (51 days for maintenance).</p>                                                                                                                                                                                                                 |

|                                     |                                                                                                                                                                                                                 |
|-------------------------------------|-----------------------------------------------------------------------------------------------------------------------------------------------------------------------------------------------------------------|
| Income Tax Rate (%)<br>15: 21: 35   | <b>Best case:</b> Aggressive tax rate.<br><b>Base case:</b> Nominal tax rate.<br><b>Worst case:</b> Conservative tax rate.                                                                                      |
| Working Capital (% FCI)<br>5: 5: 10 | <b>Best case:</b> Nominal WC for the operation of one month of plant.<br><b>Base case:</b> Nominal WC for the operation of one month of plant.<br><b>Worst case:</b> Uncertain future calamities might render i |

\*Best case refers to parameters that result in lower MSP values

**Table S16.** Sensitivity results for change to MSP BTX aromatic hydrocarbons, related to **Fig. 5a**.

| Sensitivity Analysis Parameter<br>(low cost: base case: high cost) | Change to MSP – BTX aromatic hydrocarbons (\$/kg) |           |
|--------------------------------------------------------------------|---------------------------------------------------|-----------|
|                                                                    | Low cost                                          | High cost |
| Feedstock Cost (\$/kg) 0.5: 0.6: 0.7                               | -\$0.55                                           | \$0.55    |
| Downstream Capital (%) 0: base: +100                               | \$0.73                                            | \$1.42    |
| Internal Rate of Return (%) 5: 10: 15                              | -\$0.28                                           | \$0.29    |
| Operating Expense (% M\$) -5: base: +5                             | -\$0.15                                           | \$0.31    |
| Sulfolane Cost (\$/kg) 43.8: 63.8: 81.4                            | -\$0.22                                           | \$0.19    |
| CFP Reactor Cost (%) -20, base, +40                                | -\$0.08                                           | \$0.16    |
| Catalyst Loading (%) 1: 6: 12                                      | -\$0.11                                           | \$0.13    |
| Plant Size (tpd) 500: 240: 100                                     | -\$0.15                                           | \$0.06    |
| Catalyst Cost (\$/kg) 2.43: 2.98: 6.75                             | -\$0.02                                           | \$0.17    |
| Time on Stream (%) 94: 90: 86                                      | -\$0.07                                           | \$0.08    |
| Income Tax Rate (%) 15: 21: 35                                     | -\$0.02                                           | \$0.06    |
| Working Capital (% FCI) 5: 5: 10                                   | \$0.00                                            | \$0.04    |



## Case C – Aromatics rich product

**Table S17.** Economic summary for BTX aromatic hydrocarbons production (Case C – aromatics rich product).

| <b>PRODUCTION OF BTX AROMATICS (BTX) FROM THE PYROLYSIS OF MIXED PLASTICS WASTE (MPW)</b>               |                                       |                                           |                         |
|---------------------------------------------------------------------------------------------------------|---------------------------------------|-------------------------------------------|-------------------------|
| <b>Feed Pretreatment, Catalytic Pyrolysis, Vapor Quench, Olefins Recovery, and Aromatics Extraction</b> |                                       |                                           |                         |
| <b>All Values in 2016\$</b>                                                                             |                                       |                                           |                         |
| Minimum BTX Selling Price (MSP)                                                                         |                                       | \$0.95                                    | /kg                     |
| Contributions:                                                                                          | Feedstock                             | \$2.29                                    | /kg                     |
|                                                                                                         | BTX Conversion                        | \$1.75                                    | /kg                     |
|                                                                                                         | Olefins Co-product Conversion         | \$-1.52                                   | /kg                     |
|                                                                                                         | Naphtha Co-product Conversion         | \$-0.71                                   | /kg                     |
|                                                                                                         | NGLs Co-product Conversion            | \$-0.12                                   | /kg                     |
|                                                                                                         | Other Aromatics Co-product Conversion | \$-0.73                                   | /kg                     |
|                                                                                                         | BTX Production                        | 23.58                                     | MMkg per year           |
|                                                                                                         | BTX Yield                             | 0.30                                      | Tonnes BTX/tonne feed   |
|                                                                                                         | Olefins Co-product Production         | 15.88                                     | MMkg per year           |
|                                                                                                         | Olefins Co-product Yield              | 0.20                                      | tonnes / tonne MPW feed |
|                                                                                                         | Naphtha Co-product Production         | 20.11                                     | MMkg per year           |
|                                                                                                         | Naphtha Co-product Yield              | 0.26                                      | tonnes / tonne MPW feed |
|                                                                                                         | NGLs Co-product Production            | 3.87                                      | MMkg per year           |
|                                                                                                         | NGLs Co-product Yield                 | 0.05                                      | Tonnes /tonne MPW feed  |
|                                                                                                         | Other Aromatics Co-product Production | 12.15                                     | MMkg per year           |
|                                                                                                         | Other Aromatics Co-product Yield      | 0.15                                      | tonnes/tonne MPW feed   |
|                                                                                                         | Feedstock + Handling Cost             | \$600                                     | /MT feedstock           |
|                                                                                                         | Internal Rate of Return (After-Tax)   | 10%                                       |                         |
|                                                                                                         | Equity Percent of Total Investment    | 40%                                       |                         |
| <b>Capital Costs</b>                                                                                    |                                       | <b>Manufacturing Costs (cents/kg BTX)</b> |                         |
| A100: Feedstock Pretreatment                                                                            | \$4,161,035                           | Feedstock + Handling                      | 221.1                   |
| A200: Catalytic Fast Pyrolysis                                                                          | \$24,735,394                          | Catalyst cost                             | 8.7                     |
| A300: Pyrolysis Vapor Quench                                                                            | \$1,688,686                           | OSBL Utilities                            | 46.2                    |
| A400: Olefins Separation                                                                                | \$8,834,774                           | Electricity (import)                      | 2.9                     |
| A500: Aromatics Separation                                                                              | \$4,581,411                           | Other Raw Materials                       | 32.6                    |
| OSBL (25% of ISBL)                                                                                      | \$11,000,325                          | Waste Disposal                            | 7.9                     |
| Total Installed Equipment Cost                                                                          | \$55,001,624                          | Coproducts                                | -309.4                  |
| Additional Direct Costs (17.5% of ISBL)                                                                 | \$7,700,227                           | Fixed Costs                               | 26.9                    |
| Total Direct Costs (TDC)                                                                                | \$62,701,851                          | Capital Depreciation                      | 14.0                    |
| Land and Working Capital                                                                                | \$5,156,148                           | Average Income Tax                        | 4.3                     |
| Indirect Costs (60% of TDC)                                                                             | \$37,621,111                          | Average Return on Investment              | 39.6                    |
| Total Capital Investment (TCI)                                                                          | \$105,479,110                         | Total                                     | 94.7                    |
|                                                                                                         |                                       | <b>Manufacturing Costs (\$/yr)</b>        |                         |
| Installed Equipment Cost/Annual kg                                                                      | 2.33                                  | Feedstock + Handling                      | \$52,100,000            |
| Total Capital Investment/Annual kg                                                                      | 4.47                                  | Catalyst Cost                             | \$2,000,000             |
|                                                                                                         |                                       | OSBL Utilities                            | \$10,900,000            |
|                                                                                                         |                                       | Electricity (import)                      | \$700,000               |
|                                                                                                         |                                       | Other Raw Materials                       | \$7,700,000             |
| Operating Hours Per Year (On-Stream Factor)                                                             | 7,884 (90%)                           | Waste Disposal                            | \$1,900,000             |
| Loan Rate                                                                                               | 8%                                    | Coproducts                                | \$-73,000,000           |
| Term (years)                                                                                            | 10                                    | Fixed Costs                               | \$6,300,000             |
| Capital Charge Factor (Computed)                                                                        | 0.13                                  | Capital Depreciation                      | \$3,300,000             |
|                                                                                                         |                                       | Average Income Tax                        | \$1,000,000             |
|                                                                                                         |                                       | Average Return on Investment              | \$9,300,000             |
|                                                                                                         |                                       | Total                                     | \$22,200,000            |

## Case D – Olefins rich product

**Table S18.** Economic summary for ethylene production (Case D – olefins rich product).

| <b>PRODUCTION OF ETHYLENE FROM THE PYROLYSIS OF MIXED PLASTICS WASTE (MPW)</b><br><b>Feed Pretreatment, Catalytic Pyrolysis, Vapor Quench, Olefins recovery, and Aromatics Extraction</b><br><b>All Values in 2016\$</b> |                                       |                                                |                            |
|--------------------------------------------------------------------------------------------------------------------------------------------------------------------------------------------------------------------------|---------------------------------------|------------------------------------------------|----------------------------|
| Minimum Ethylene Selling Price (MSP)                                                                                                                                                                                     |                                       | \$0.85                                         | /kg                        |
| Contributions:                                                                                                                                                                                                           | Feedstock                             | \$5.54                                         | /kg                        |
|                                                                                                                                                                                                                          | Ethylene Conversion                   | \$4.37                                         | /kg                        |
|                                                                                                                                                                                                                          | Olefins Co-product Conversion         | \$-6.88                                        | /kg                        |
|                                                                                                                                                                                                                          | Naphtha Co-product Conversion         | \$-1.22                                        | /kg                        |
|                                                                                                                                                                                                                          | NGLs Co-product Conversion            | \$-0.87                                        | /kg                        |
|                                                                                                                                                                                                                          | Other Aromatics Co-product Conversion | \$-0.09                                        | /kg                        |
|                                                                                                                                                                                                                          | Ethylene Production                   | 9.7                                            | MMkg per year              |
|                                                                                                                                                                                                                          | Ethylene Yield                        | 0.12                                           | Tonnes Ethylene/tonne feed |
|                                                                                                                                                                                                                          | Olefins Co-product Production         | 31.6                                           | MMkg per year              |
|                                                                                                                                                                                                                          | Olefins Co-product Yield              | 0.40                                           | tonnes / tonne MPW feed    |
|                                                                                                                                                                                                                          | Naphtha Coproduct Production          | 15.1                                           | MMkg per year              |
|                                                                                                                                                                                                                          | Naphtha Co-product Yield              | 0.19                                           | tonnes / tonne MPW feed    |
|                                                                                                                                                                                                                          | NGLs Co-product Production            | 11.48                                          | MMkg per year              |
|                                                                                                                                                                                                                          | NGLs Co-product Yield                 | 0.15                                           | Tonnes /tonne MPW feed     |
|                                                                                                                                                                                                                          | Other Aromatics Co-product Production | 0.38                                           | MMkg per year              |
|                                                                                                                                                                                                                          | Other Aromatics Co-product Yield      | 0.005                                          | tonnes/tonne MPW feed      |
|                                                                                                                                                                                                                          | Feedstock + Handling Cost             | \$600                                          | /MT feedstock              |
|                                                                                                                                                                                                                          | Internal Rate of Return (After-Tax)   | 10%                                            |                            |
|                                                                                                                                                                                                                          | Equity Percent of Total Investment    | 40%                                            |                            |
| <b>Capital Costs</b>                                                                                                                                                                                                     |                                       | <b>Manufacturing Costs (cents/kg Ethylene)</b> |                            |
| A100: Feedstock Pretreatment                                                                                                                                                                                             | \$4,161,035                           | Feedstock + Handling                           | 535.3                      |
| A200: Catalytic Fast Pyrolysis                                                                                                                                                                                           | \$26,883,043                          | Catalyst cost                                  | 101.5                      |
| A300: Pyrolysis Vapor Quench                                                                                                                                                                                             | \$2,592,147                           | OSBL Utilities                                 | 104.9                      |
| A400: Olefins Separation                                                                                                                                                                                                 | \$12,793,216                          | Electricity (import)                           | 9.4                        |
| A500: Aromatics Separation                                                                                                                                                                                               | \$2,369,374                           | Other Raw Materials                            | 11.6                       |
| OSBL (25% of ISBL)                                                                                                                                                                                                       | \$12,199,704                          | Waste Disposal                                 | 5.3                        |
| Total Installed Equipment Cost                                                                                                                                                                                           | \$60,998,518                          | Coproducts                                     | -907.2                     |
| Additional Direct Costs (17.5% of ISBL)                                                                                                                                                                                  | \$8,539,792                           | Fixed Costs                                    | 69.2                       |
| Total Direct Costs (TDC)                                                                                                                                                                                                 | \$69,538,310                          | Capital Depreciation                           | 38.0                       |
| Land and Working Capital                                                                                                                                                                                                 | \$5,703,065                           | Average Income Tax                             | 11.5                       |
| Indirect Costs (60% of TDC)                                                                                                                                                                                              | \$41,722,986                          | Average Return on Investment                   | 105.3                      |
| Total Capital Investment (TCI)                                                                                                                                                                                           | \$116,964,361                         | Total                                          | 84.9                       |
|                                                                                                                                                                                                                          |                                       | <b>Manufacturing Costs (\$/yr)</b>             |                            |
| Installed Equipment Cost/Annual kg                                                                                                                                                                                       | 6.26                                  | Feedstock + Handling                           | \$52,100,000               |
| Total Capital Investment/Annual kg                                                                                                                                                                                       | 12.01                                 | Catalyst Cost                                  | \$9,900,000                |
|                                                                                                                                                                                                                          |                                       | OSBL Utilities                                 | \$10,200,000               |
|                                                                                                                                                                                                                          |                                       | Electricity (import)                           | \$900,000                  |
|                                                                                                                                                                                                                          |                                       | Other Raw Materials                            | \$1,100,000                |
|                                                                                                                                                                                                                          |                                       | Waste Disposal                                 | \$500,000                  |
|                                                                                                                                                                                                                          |                                       | Coproducts                                     | \$-88,400,000              |
|                                                                                                                                                                                                                          |                                       | Fixed Costs                                    | \$6,700,000                |
|                                                                                                                                                                                                                          |                                       | Capital Depreciation                           | \$3,700,000                |
|                                                                                                                                                                                                                          |                                       | Average Income Tax                             | \$1,100,000                |
|                                                                                                                                                                                                                          |                                       | Average Return on Investment                   | \$10,300,000               |
|                                                                                                                                                                                                                          |                                       | Total                                          | \$8,100,000                |
| Operating Hours Per Year (On-Stream Factor)                                                                                                                                                                              | 7,884 (90%)                           |                                                |                            |
| Loan Rate                                                                                                                                                                                                                | 8%                                    |                                                |                            |
| Term (years)                                                                                                                                                                                                             | 10                                    |                                                |                            |
| Capital Charge Factor (Computed)                                                                                                                                                                                         | 0.13                                  |                                                |                            |

**Table S19.** MFI results on supply chain energy and GHG emissions for Case A – naphtha product, related to **Fig. 6b-c** in the main text.

|                  | Supply Chain Energy Requirements (MJ/kg <sub>Naphtha</sub> )               |                        |                       |                                           |                             |              |
|------------------|----------------------------------------------------------------------------|------------------------|-----------------------|-------------------------------------------|-----------------------------|--------------|
| Case             | Process Fuel                                                               | Fuel for Electricity   | Renewable Electricity | Fuel for Transportation                   | Fuel as Chemical Feedstocks | Total Energy |
| Virgin naphtha   | 5.23                                                                       | 0.94                   | 0.07                  | 0.97                                      | 43.89                       | 51.10        |
| Case A – naphtha | 11.1                                                                       | 7.31                   | 0.37                  | 2.65                                      | 6.50                        | 28.0         |
|                  | Supply Chain GHG Emissions (kg CO <sub>2</sub> -eq/kg <sub>Naphtha</sub> ) |                        |                       |                                           |                             |              |
| Case             | Process Fuel                                                               | Electricity Generation | Transportation        | Pyrolysis reaction emissions              | Total GHG                   |              |
| Virgin naphtha   | 0.31                                                                       | 0.07                   | 0.09                  | data not available                        | 0.47                        |              |
| Case A – naphtha | 0.74                                                                       | 0.52                   | 0.22                  | 0.88 (not included in the total at right) | 0.98                        |              |

**Table S20.** MFI results on supply chain energy and GHG emissions for Case B – mixed product (base case), related to **Fig. 6b-c** in the main text. Here, the principal product is BTX mixture.

|                        | Supply Chain Energy Requirements (MJ/kg <sub>BTX</sub> )               |                        |                       |                                           |                             |              |
|------------------------|------------------------------------------------------------------------|------------------------|-----------------------|-------------------------------------------|-----------------------------|--------------|
| Case                   | Process Fuel                                                           | Fuel for Electricity   | Renewable Electricity | Fuel for Transportation                   | Fuel as Chemical Feedstocks | Total Energy |
| Virgin BTX aromatics   | 11                                                                     | 4.673                  | 0.342                 | 2.749                                     | 39.46                       | 58.22        |
| Case B – mixed product | 22.2                                                                   | 12.5                   | 0.572                 | 5.31                                      | 3.73                        | 44.4         |
|                        | Supply Chain GHG Emissions (kg CO <sub>2</sub> -eq/kg <sub>BTX</sub> ) |                        |                       |                                           |                             |              |
| Case                   | Process Fuel                                                           | Electricity Generation | Transportation        | Pyrolysis reaction emissions              | Total GHG                   |              |
| Virgin BTX aromatics   | 0.58                                                                   | 0.34                   | 0.24                  | data not available                        | 1.16                        |              |
| Case B – mixed product | 1.49                                                                   | 0.89                   | 0.44                  | 1.85 (not included in the total at right) | 2.82                        |              |

**Table S21.** MFI results on supply chain energy and GHG emissions for Case C – aromatics-rich product, related to **Fig. 6b-c** in the main text.

|                        | Supply Chain Energy Requirements (MJ/kg <sub>BTX</sub> )               |                        |                       |                                           |                             |              |
|------------------------|------------------------------------------------------------------------|------------------------|-----------------------|-------------------------------------------|-----------------------------|--------------|
| Case                   | Process Fuel                                                           | Fuel for Electricity   | Renewable Electricity | Fuel for Transportation                   | Fuel as Chemical Feedstocks | Total Energy |
| Virgin BTX aromatics   | 10.92                                                                  | 5.38                   | 0.39                  | 3.09                                      | 35.68                       | 55.46        |
| Case C – BTX aromatics | 19.2                                                                   | 7.96                   | 0.345                 | 3.53                                      | 2.47                        | 28.1         |
|                        | Supply Chain GHG Emissions (kg CO <sub>2-eq</sub> /kg <sub>BTX</sub> ) |                        |                       |                                           |                             |              |
| Case                   | Process Fuel                                                           | Electricity Generation | Transportation        | Pyrolysis reaction emissions              | Total GHG                   |              |
| Virgin BTX aromatics   | 0.57                                                                   | 0.39                   | 0.27                  | data not available                        | 1.23                        |              |
| Case C – BTX aromatics | 0.93                                                                   | 0.56                   | 0.30                  | 1.23 (not included in the total at right) | 1.79                        |              |

**Table S22.** MFI Results on supply chain energy and GHG emissions for Case D – olefins-rich product, related to **Fig. 6b-c** in the main text.

|                   | Supply Chain Energy Requirements (MJ/kg <sub>Ethylene</sub> )               |                        |                       |                                           |                             |              |
|-------------------|-----------------------------------------------------------------------------|------------------------|-----------------------|-------------------------------------------|-----------------------------|--------------|
| Case              | Process Fuel                                                                | Fuel for Electricity   | Renewable Electricity | Fuel for Transportation                   | Fuel as Chemical Feedstocks | Total Energy |
| Virgin ethylene   | 8.72                                                                        | 2.16                   | 0.16                  | 1.49                                      | 46.03                       | 58.56        |
| Case D – ethylene | 22.4                                                                        | 13.1                   | 0.55                  | 6.12                                      | 4.24                        | 46.3         |
|                   | Supply Chain GHG Emissions (kg CO <sub>2-eq</sub> /kg <sub>Ethylene</sub> ) |                        |                       |                                           |                             |              |
|                   | Process Fuel                                                                | Electricity Generation | Transportation        | Pyrolysis reaction emissions              | Total GHG                   |              |
| Virgin ethylene   | 0.49                                                                        | 0.16                   | 0.13                  | data not available                        | 0.78                        |              |
| Case D – ethylene | 1.50                                                                        | 0.91                   | 0.52                  | 1.40 (not included in the total at right) | 2.94                        |              |

**Table S23.** Life cycle assessment results for Case A – naphtha product in which pyrolysis of mixed plastic waste is used to produce naphtha, related to **Fig. 7a-b** in the main text. The results for fossil-based naphtha are included for comparison.

|                                                          | <i>Impact category</i>                              |                                 |                                |                                        |                                                  |                                                       |                                    |                                        |                                          |                                           |                                        |
|----------------------------------------------------------|-----------------------------------------------------|---------------------------------|--------------------------------|----------------------------------------|--------------------------------------------------|-------------------------------------------------------|------------------------------------|----------------------------------------|------------------------------------------|-------------------------------------------|----------------------------------------|
|                                                          | <b>Acidification</b><br>kg SO <sub>2</sub><br>eq/kg | <b>Carcinogenics</b><br>CTUh/kg | <b>Eco-toxicity</b><br>CTUe/kg | <b>Eutrophication</b><br>kg N<br>eq/kg | <b>Fossil fuel depletion</b><br>MJ<br>surplus/kg | <b>Global warming</b><br>kg CO <sub>2</sub><br>eq./kg | <b>Non carcinogenic</b><br>CTUh/kg | <b>Ozone depletion</b><br>kg CFC-11/kg | <b>Particulates</b><br>kg PM2.5<br>eq/kg | <b>Smog</b><br>kg O <sub>3</sub><br>eq/kg | <b>Water use</b><br>m <sup>3</sup> /kg |
| <i>Case A: mixed plastic waste pyrolysis for naphtha</i> |                                                     |                                 |                                |                                        |                                                  |                                                       |                                    |                                        |                                          |                                           |                                        |
| <b>TOTAL</b>                                             | <b>0.007</b>                                        | <b>9.2E-8</b>                   | <b>51.6</b>                    | <b>0.0151</b>                          | <b>3.21</b>                                      | <b>2.74</b>                                           | <b>9.02E-7</b>                     | <b>3.53E-7</b>                         | <b>0.00248</b>                           | <b>0.0963</b>                             | <b>7.09</b>                            |
| <i>Standard deviation</i>                                | <i>0.0008</i>                                       | <i>6.15E-8</i>                  | <i>21.7</i>                    | <i>0.0062</i>                          | <i>0.401</i>                                     | <i>0.073</i>                                          | <i>4.46E-7</i>                     | <i>1.33E-7</i>                         | <i>0.00026</i>                           | <i>0.0076</i>                             | <i>9.4</i>                             |
| Process Emissions                                        | 0                                                   | 0                               | 0                              | 0                                      | 0                                                | 0.877                                                 | 0                                  | 0                                      | 0                                        | 0                                         | 0                                      |
| Catalyst                                                 | 2.39E-5                                             | 1.77E-10                        | 0.023                          | 1.51E-05                               | 0.004                                            | 0.004                                                 | 8.7E-10                            | 5.41E-10                               | 6.11E-06                                 | 0.0002                                    | 0.003                                  |
| Cooling Water                                            | 5.34E-6                                             | 2.76E-10                        | 0.020                          | 4.53E-06                               | 0.001                                            | 0.001                                                 | 5.8E-10                            | 1.09E-10                               | 1.63E-06                                 | 7.69E-5                                   | 6.72                                   |
| Process Water                                            | 4.05E-6                                             | 1.11E-10                        | 0.006                          | 2.98E-06                               | 0.001                                            | 0.001                                                 | 2.5E-10                            | 2.85E-10                               | 1.56E-06                                 | 4.63E-5                                   | 0.020                                  |
| Methane                                                  | 0.0006                                              | 2.08E-09                        | 0.210                          | 0.0002                                 | 0.690                                            | 0.049                                                 | 7.93E-09                           | 7.51E-08                               | 8.03E-05                                 | 0.0037                                    | 0.020                                  |
| Infrastructure                                           | 1.30E-7                                             | 4.36E-12                        | 0.001                          | 1.82E-07                               | 1.11E-05                                         | 1.48E-05                                              | 3.9E-11                            | 1.06E-12                               | 3.09E-08                                 | 9.97E-7                                   | 4.0E-6                                 |
| Steam                                                    | 0.0007                                              | 2.50E-09                        | 0.235                          | 0.0002                                 | 0.323                                            | 0.172                                                 | 1.04E-08                           | 2.14E-08                               | 6.97E-05                                 | 0.0051                                    | 0.009                                  |
| Electricity                                              | 0.0007                                              | 1.53E-08                        | 1.75                           | 0.0016                                 | 0.149                                            | 0.196                                                 | 5.23E-08                           | 2.08E-08                               | 0.0006                                   | 0.0050                                    | 0.033                                  |
| Plastic feedstock                                        | 0.0050                                              | 7.15E-8                         | 49.3                           | 0.0131                                 | 2.04                                             | 1.44                                                  | 8.29E-7                            | 2.35E-7                                | 0.00171                                  | 0.0822                                    | 0.295                                  |
| Solids Disposal                                          | 8.23E-7                                             | 2.82E-11                        | 2.13E-03                       | 5.22E-06                               | 8.42E-05                                         | 9.57E-05                                              | 5.0E-10                            | 7.06E-12                               | 1.57E-07                                 | 3.36E-5                                   | 1.7E-4                                 |
| Wastewater                                               | 8.23E-7                                             | 2.82E-11                        | 0.002                          | 5.22E-06                               | 8.42E-05                                         | 9.57E-05                                              | 5.0E-10                            | 7.06E-12                               | 1.57E-07                                 | 8.09E-6                                   | -0.007                                 |
| <i>Fossil-based naphtha</i>                              |                                                     |                                 |                                |                                        |                                                  |                                                       |                                    |                                        |                                          |                                           |                                        |
| <b>TOTAL</b>                                             | <b>0.0053</b>                                       | <b>1.77E-8</b>                  | <b>1.60</b>                    | <b>0.0019</b>                          | <b>8.04</b>                                      | <b>0.501</b>                                          | <b>6.60E-8</b>                     | <b>9.10E-7</b>                         | <b>0.0006</b>                            | <b>0.044</b>                              | <b>0.259</b>                           |
| <i>Standard deviation</i>                                | <i>0.0018</i>                                       | <i>2.12E-8</i>                  | <i>0.547</i>                   | <i>0.0005</i>                          | <i>0.198</i>                                     | <i>0.0809</i>                                         | <i>5.08E-8</i>                     | <i>4.95E-8</i>                         | <i>0.00015</i>                           | <i>0.0175</i>                             | <i>0.80</i>                            |

**Table S24.** Life cycle assessment results for Case B – mixed product (base case) in which pyrolysis of mixed plastic waste is used to produce a benzene, toluene, and xylene mixture (BTX), related to **Fig. 7c-d** in the main text. The results for fossil-based BTX mixture are included for comparison.

|                                                                | <i>Impact category</i>                       |                          |                         |                              |                                              |                                                   |                                |                                        |                                   |                                 |                                    |
|----------------------------------------------------------------|----------------------------------------------|--------------------------|-------------------------|------------------------------|----------------------------------------------|---------------------------------------------------|--------------------------------|----------------------------------------|-----------------------------------|---------------------------------|------------------------------------|
|                                                                | Acidification<br>kg SO <sub>2</sub><br>eq/kg | Carcinogenics<br>CTUh/kg | Eco-toxicity<br>CTUe/kg | Eutrophication<br>kg N eq/kg | Fossil fuel<br>depletion<br>MJ<br>surplus/kg | Global<br>warming<br>kg CO <sub>2</sub><br>eq./kg | Non<br>carcinogenic<br>CTUh/kg | Ozone<br>depletion<br>kg CFC-<br>11/kg | Particulates<br>kg PM2.5<br>eq/kg | Smog kg<br>O <sub>3</sub> eq/kg | Water<br>use<br>m <sup>3</sup> /kg |
| <i>Case B: mixed plastic waste pyrolysis for BTX aromatics</i> |                                              |                          |                         |                              |                                              |                                                   |                                |                                        |                                   |                                 |                                    |
| <b>TOTAL</b>                                                   | <b>0.0071</b>                                | <b>2.33E-7</b>           | <b>119</b>              | <b>0.042</b>                 | <b>-21.0</b>                                 | <b>4.64</b>                                       | <b>2.20E-6</b>                 | <b>-1.96E-7</b>                        | <b>0.00891</b>                    | <b>0.081</b>                    | <b>38.5</b>                        |
| <i>Standard deviation</i>                                      | <i>0.0032</i>                                | <i>2.53E-7</i>           | <i>44.4</i>             | <i>0.0187</i>                | <i>2.4</i>                                   | <i>0.412</i>                                      | <i>1.09E-6</i>                 | <i>2.17E-7</i>                         | <i>0.00139</i>                    | <i>0.0274</i>                   | <i>52.0</i>                        |
| Process Emissions                                              | 0                                            | 0                        | 0                       | 0                            | 0                                            | 1.85                                              | 0                              | 0                                      | 0                                 | 0                               | 0                                  |
| Catalyst                                                       | 5.17E-5                                      | 3.83E-10                 | 0.051                   | 3.27E-5                      | 0.010                                        | 0.009                                             | 1.89E-9                        | 1.17E-9                                | 1.32E-5                           | 0.0005                          | 0.006                              |
| Cooling Water                                                  | 3.12E-5                                      | 1.61E-9                  | 0.117                   | 2.65E-5                      | 0.007                                        | 0.007                                             | 3.38E-9                        | 6.36E-10                               | 9.50E-6                           | 0.0004                          | 39.2                               |
| Process Water                                                  | 2.22E-5                                      | 6.11E-10                 | 0.034                   | 1.64E-5                      | 0.003                                        | 0.004                                             | 1.39E-9                        | 1.57E-9                                | 8.58E-6                           | 0.0003                          | 0.112                              |
| DMF                                                            | 9.03E-6                                      | 6.23E-11                 | 0.010                   | 1.08E-5                      | 0.005                                        | 0.001                                             | 4.0E-10                        | 3.44E-10                               | 1.62E-6                           | 7.04E-5                         | 0.001                              |
| Sulfolane                                                      | 0.0003                                       | 7.80E-10                 | 0.090                   | 5.57E-5                      | 0.073                                        | 0.015                                             | 3.54E-9                        | 2.70E-9                                | 4.04E-5                           | 0.0007                          | 0.026                              |
| Infrastructure                                                 | 2.83E-7                                      | 9.43E-12                 | 0.002                   | 3.94E-7                      | 2.40E-5                                      | 3.20E-5                                           | 8.4E-11                        | 2.29E-12                               | 6.69E-8                           | 2.16E-6                         | 8.6E-6                             |
| Steam                                                          | 0.0067                                       | 2.52E-8                  | 2.36                    | 0.0016                       | 3.25                                         | 1.73                                              | 1.05E-7                        | 2.15E-7                                | 0.0007                            | 0.0508                          | 0.091                              |
| Plastic feedstock                                              | 0.011                                        | 1.55E-7                  | 107                     | 0.0284                       | 4.42                                         | 3.13                                              | 1.80E-6                        | 5.08E-7                                | 0.0037                            | 0.178                           | 0.639                              |
| Electricity                                                    | 0.0018                                       | 3.82E-8                  | 4.37                    | 0.0040                       | 0.372                                        | 0.488                                             | 1.31E-7                        | 5.19E-8                                | 0.0015                            | 0.0125                          | 0.081                              |
| Refrigeration                                                  | 0.0066                                       | 1.40E-7                  | 16.02                   | 0.0145                       | 1.36                                         | 1.79                                              | 4.79E-7                        | 1.90E-7                                | 0.0056                            | 0.0458                          | 0.297                              |
| Solids Disposal                                                | 5.56E-6                                      | 5.73E-10                 | 2.80                    | 0.0002                       | 0.001                                        | 0.013                                             | 3.75E-8                        | 1.16E-10                               | 8.74E-7                           | 7.28E-5                         | 0.000                              |
| Wastewater                                                     | 3.39E-6                                      | 1.16E-10                 | 0.009                   | 2.15E-5                      | 0.000                                        | 0.000                                             | 2.06E-9                        | 2.91E-11                               | 6.48E-7                           | 3.33E-5                         | -0.027                             |
| Aromatics (co-product)                                         | -0.0050                                      | -5.95E-8                 | -5.92                   | -0.0040                      | -4.85                                        | -1.28                                             | -1.96E-7                       | -5.91E-8                               | -0.0013                           | -0.0594                         | -0.775                             |
| Naphtha (co-product)                                           | -0.0054                                      | -1.82E-8                 | -1.65                   | -0.0019                      | -8.30                                        | -0.518                                            | -6.81E-8                       | -9.40E-7                               | -0.0006                           | -0.0455                         | -0.268                             |
| Ethylene (co-product)                                          | -0.0063                                      | -1.14E-8                 | -1.52                   | -0.0005                      | -3.70                                        | -0.427                                            | -5.20E-8                       | -3.88E-7                               | -0.0005                           | -0.0158                         | -0.064                             |
| Propylene (co-product)                                         | -0.0030                                      | -1.92E-8                 | -1.06                   | -0.0002                      | -7.35                                        | -1.10                                             | -9.36E-9                       | -3.94E-10                              | -0.0002                           | -0.0412                         | -0.366                             |
| Butene (co-product)                                            | -0.0021                                      | -1.51E-8                 | -0.867                  | -0.0001                      | -4.75                                        | -0.789                                            | -9.38E-9                       | -2.31E-9                               | -0.0002                           | -0.0284                         | -0.329                             |
| Ethane (co-product)                                            | -0.0003                                      | -1.35E-9                 | -0.123                  | -6.49E-5                     | -0.230                                       | -0.029                                            | -4.58E-9                       | -1.04E-8                               | -4.10E-5                          | -0.0016                         | -0.003                             |
| Propane (co-product)                                           | -0.0008                                      | -2.65E-9                 | -0.248                  | -0.0002                      | -1.01                                        | -0.107                                            | -1.11E-8                       | -1.13E-7                               | -9.35E-5                          | -0.0075                         | -0.031                             |
| Butane (co-product)                                            | -0.0013                                      | -5.52E-9                 | -0.506                  | -0.0003                      | -0.941                                       | -0.120                                            | -1.88E-8                       | -4.23E-8                               | -0.0002                           | -0.0065                         | -0.014                             |
| <i>Fossil-based BTX aromatics</i>                              |                                              |                          |                         |                              |                                              |                                                   |                                |                                        |                                   |                                 |                                    |
| <b>TOTAL</b>                                                   | <b>0.0048</b>                                | <b>4.45E-8</b>           | <b>2.18</b>             | <b>0.0006</b>                | <b>9.13</b>                                  | <b>1.65</b>                                       | <b>3.33E-8</b>                 | <b>1.42E-8</b>                         | <b>0.0004</b>                     | <b>0.066</b>                    | <b>1.28</b>                        |
| <i>Standard deviation</i>                                      | <i>9.50E-5</i>                               | <i>2.32E-8</i>           | <i>2.52</i>             | <i>0.00019</i>               | <i>0.039</i>                                 | <i>0.013</i>                                      | <i>8.15E-8</i>                 | <i>7.16E-9</i>                         | <i>3.11E-5</i>                    | <i>0.0018</i>                   | <i>3.45</i>                        |

**Table S25.** Life cycle assessment results for Case C – aromatics-rich product in which pyrolysis of mixed plastic waste is used to produce a benzene, toluene, and xylene mixture (BTX) under a high selectivity towards aromatics scenario, related to **Fig. 7e-f** in the main text. The results for fossil-based BTX aromatic hydrocarbons are included for comparison.

|                                                                                            | <i>Impact category</i>                               |                                  |                                |                                      |                                               |                                                       |                                     |                                        |                                          |                                       |                                        |
|--------------------------------------------------------------------------------------------|------------------------------------------------------|----------------------------------|--------------------------------|--------------------------------------|-----------------------------------------------|-------------------------------------------------------|-------------------------------------|----------------------------------------|------------------------------------------|---------------------------------------|----------------------------------------|
|                                                                                            | <b>Acidif-ication</b><br>kg SO <sub>2</sub><br>eq/kg | <b>Carcin-ogenics</b><br>CTUh/kg | <b>Eco-toxicity</b><br>CTUe/kg | <b>Eutro-plication</b><br>kg N eq/kg | <b>Fossil fuel depletion</b><br>MJ surplus/kg | <b>Global warming</b><br>kg CO <sub>2</sub><br>eq./kg | <b>Non carcin-ogenic</b><br>CTUh/kg | <b>Ozone depletion</b><br>kg CFC-11/kg | <b>Particulates</b><br>kg PM2.5<br>eq/kg | <b>Smog kg O<sub>3</sub></b><br>eq/kg | <b>Water use</b><br>m <sup>3</sup> /kg |
| <i>Case C: mixed plastic waste pyrolysis for BTX aromatics (high aromatic selectivity)</i> |                                                      |                                  |                                |                                      |                                               |                                                       |                                     |                                        |                                          |                                       |                                        |
| <b>TOTAL</b>                                                                               | <b>-0.0006</b>                                       | <b>8.26E-8</b>                   | <b>71.5</b>                    | <b>0.0205</b>                        | <b>-14.6</b>                                  | <b>2.2</b>                                            | <b>1.2E-6</b>                       | <b>-4.0E-7</b>                         | <b>0.00324</b>                           | <b>0.0589</b>                         | <b>14.2</b>                            |
| <i>Standard deviation</i>                                                                  | <i>0.00214</i>                                       | <i>1.29E-7</i>                   | <i>30.0</i>                    | <i>0.0101</i>                        | <i>2.14</i>                                   | <i>0.32</i>                                           | <i>6.42E-7</i>                      | <i>3.45E-7</i>                         | <i>0.00077</i>                           | <i>0.0176</i>                         | <i>22.4</i>                            |
| Process Emissions                                                                          | 0                                                    | 2.79E-12                         | 0.000                          | 0                                    | 0                                             | 1.27                                                  | 7.9E-11                             | 0                                      | 9.51E-7                                  | 0.0374                                | 0                                      |
| Catalyst                                                                                   | 3.47E-5                                              | 2.57E-10                         | 0.034                          | 2.19E-5                              | 0.006                                         | 0.006                                                 | 1.27E-9                             | 7.87E-10                               | 8.89E-6                                  | 0.0003                                | 0.004                                  |
| Cooling Water                                                                              | 1.18E-5                                              | 6.11E-10                         | 0.045                          | 1.00E-5                              | 0.003                                         | 0.003                                                 | 1.28E-9                             | 2.41E-10                               | 3.60E-6                                  | 0.0002                                | 14.9                                   |
| Process Water                                                                              | 1.73E-5                                              | 4.76E-10                         | 0.027                          | 1.27E-5                              | 0.003                                         | 0.003                                                 | 1.08E-9                             | 1.22E-9                                | 6.68E-6                                  | 0.0002                                | 0.087                                  |
| DMF                                                                                        | 2.37E-5                                              | 1.64E-10                         | 0.027                          | 2.83E-5                              | 0.013                                         | 0.004                                                 | 1.05E-9                             | 9.03E-10                               | 4.25E-6                                  | 0.0002                                | 0.002                                  |
| Sulfolane                                                                                  | 0.0002                                               | 3.49E-10                         | 0.040                          | 2.49E-5                              | 0.033                                         | 0.007                                                 | 1.58E-9                             | 1.21E-9                                | 1.81E-5                                  | 0.0003                                | 0.012                                  |
| Infrastructure                                                                             | 1.90E-7                                              | 6.33E-12                         | 0.001                          | 2.65E-7                              | 1.61E-5                                       | 2.15E-5                                               | 5.7E-11                             | 1.54E-12                               | 4.49E-8                                  | 1.45E-6                               | 5.8E-6                                 |
| Steam                                                                                      | 0.0035                                               | 1.30E-8                          | 1.22                           | 0.0008                               | 1.68                                          | 0.896                                                 | 5.41E-8                             | 1.11E-7                                | 0.0004                                   | 0.0263                                | 0.047                                  |
| Plastic feedstock                                                                          | 0.0072                                               | 1.04E-7                          | 71.7                           | 0.0190                               | 2.97                                          | 2.1                                                   | 1.21E-6                             | 3.41E-7                                | 0.00248                                  | 0.120                                 | 0.429                                  |
| Electricity                                                                                | 0.0010                                               | 2.17E-8                          | 2.48                           | 0.0022                               | 0.211                                         | 0.277                                                 | 7.41E-8                             | 2.94E-8                                | 0.0009                                   | 0.0071                                | 0.046                                  |
| Refrigeration                                                                              | 0.0021                                               | 4.48E-8                          | 5.12                           | 0.0046                               | 0.435                                         | 0.572                                                 | 1.53E-7                             | 6.07E-8                                | 0.0018                                   | 0.0146                                | 0.095                                  |
| Solids Disposal                                                                            | 3.73E-6                                              | 3.85E-10                         | 1.88                           | 0.0001                               | 0.001                                         | 0.008                                                 | 2.52E-8                             | 7.77E-11                               | 5.87E-7                                  | 4.89E-5                               | 0.000                                  |
| Wastewater                                                                                 | 2.27E-6                                              | 7.76E-11                         | 0.006                          | 1.44E-5                              | 0.000                                         | 0.000                                                 | 1.38E-9                             | 1.94E-11                               | 4.33E-7                                  | 2.23E-5                               | -0.018                                 |
| Aromatics (co-product)                                                                     | -0.0050                                              | -5.95E-8                         | -5.93                          | -0.0040                              | -4.85                                         | -1.28                                                 | -1.97E-7                            | -5.92E-8                               | -0.0013                                  | -0.0594                               | -0.775                                 |
| Naphtha (co-product)                                                                       | -0.0045                                              | -1.51E-8                         | -1.36                          | -0.0016                              | -6.85                                         | -0.428                                                | -5.63E-8                            | -7.77E-7                               | -0.0005                                  | -0.0375                               | -0.221                                 |
| Ethylene (co-product)                                                                      | -0.0019                                              | -3.38E-9                         | -0.451                         | -0.0002                              | -1.10                                         | -0.127                                                | -1.54E-8                            | -1.15E-7                               | -0.0002                                  | -0.0047                               | -0.019                                 |
| Propylene (co-product)                                                                     | -0.0009                                              | -5.92E-9                         | -0.326                         | -5.42E-5                             | -2.27                                         | -0.338                                                | -2.89E-9                            | -1.22E-10                              | -7.43E-5                                 | -0.0127                               | -0.113                                 |
| Butene (co-product)                                                                        | -0.0014                                              | -1.02E-8                         | -0.582                         | -0.0001                              | -3.19                                         | -0.530                                                | -6.30E-9                            | -1.55E-9                               | -0.0001                                  | -0.0191                               | -0.221                                 |
| Ethane (co-product)                                                                        | -0.0013                                              | -5.46E-9                         | -0.501                         | -0.0003                              | -0.934                                        | -0.118                                                | -1.86E-8                            | -4.21E-8                               | -0.0002                                  | -0.0064                               | -0.011                                 |
| Propane (co-product)                                                                       | -0.0003                                              | -8.2E-10                         | -0.076                         | -7.71E-5                             | -0.311                                        | -0.033                                                | -3.42E-9                            | -3.48E-8                               | -2.88E-5                                 | -0.0023                               | -0.010                                 |
| Butane (co-product)                                                                        | -0.0009                                              | -3.70E-9                         | -0.340                         | -0.0002                              | -0.632                                        | -0.081                                                | -1.26E-8                            | -2.84E-8                               | -0.0001                                  | -0.0044                               | -0.009                                 |
| <i>Fossil-based BTX aromatics</i>                                                          |                                                      |                                  |                                |                                      |                                               |                                                       |                                     |                                        |                                          |                                       |                                        |
| <b>TOTAL</b>                                                                               | <b>0.0048</b>                                        | <b>4.45E-8</b>                   | <b>2.18</b>                    | <b>0.0006</b>                        | <b>9.13</b>                                   | <b>1.65</b>                                           | <b>3.33E-8</b>                      | <b>1.42E-8</b>                         | <b>0.0004</b>                            | <b>0.066</b>                          | <b>1.28</b>                            |
| <i>Standard deviation</i>                                                                  | <i>9.50E-5</i>                                       | <i>2.32E-8</i>                   | <i>2.52</i>                    | <i>0.00019</i>                       | <i>0.039</i>                                  | <i>0.013</i>                                          | <i>8.15E-8</i>                      | <i>7.16E-9</i>                         | <i>3.11E-5</i>                           | <i>0.0018</i>                         | <i>3.45</i>                            |

**Table S26.** Life cycle assessment results for Case D – olefins-rich product in which pyrolysis of mixed plastic waste is used to produce ethylene under a high selectivity towards olefins scenario, related to **Fig. 7g-h** in the main text. The results for fossil-based ethylene are included for comparison.

|                                                           | <i>Impact category</i>                               |                                  |                                |                                      |                                                      |                                                           |                                         |                                                |                                          |                                           |                                            |
|-----------------------------------------------------------|------------------------------------------------------|----------------------------------|--------------------------------|--------------------------------------|------------------------------------------------------|-----------------------------------------------------------|-----------------------------------------|------------------------------------------------|------------------------------------------|-------------------------------------------|--------------------------------------------|
|                                                           | <b>Acidif-ication</b><br>kg SO <sub>2</sub><br>eq/kg | <b>Carcin-ogenics</b><br>CTUh/kg | <b>Eco-toxicity</b><br>CTUe/kg | <b>Eutro-phication</b><br>kg N eq/kg | <b>Fossil fuel<br/>depletion</b><br>MJ<br>surplus/kg | <b>Global<br/>warming</b><br>kg CO <sub>2</sub><br>eq./kg | <b>Non<br/>carcin-ogenic</b><br>CTUh/kg | <b>Ozone<br/>depletion</b><br>kg CFC-<br>11/kg | <b>Particulates</b><br>kg PM2.5<br>eq/kg | <b>Smog</b><br>kg O <sub>3</sub><br>eq/kg | <b>Water<br/>use</b><br>m <sup>3</sup> /kg |
| <i>Case D: mixed plastic waste pyrolysis for ethylene</i> |                                                      |                                  |                                |                                      |                                                      |                                                           |                                         |                                                |                                          |                                           |                                            |
| <b>TOTAL</b>                                              | <b>0.0193</b>                                        | <b>3.04E-7</b>                   | <b>141</b>                     | <b>0.0527</b>                        | <b>-18.1</b>                                         | <b>5.34</b>                                               | <b>2.74E-6</b>                          | <b>8.53E-7</b>                                 | <b>0.0122</b>                            | <b>0.138</b>                              | <b>37.1</b>                                |
| <b>Standard deviation</b>                                 | <b>0.00525</b>                                       | <b>5.20E-7</b>                   | <b>57.1</b>                    | <b>0.0221</b>                        | <b>2.03</b>                                          | <b>0.475</b>                                              | <b>1.28E-6</b>                          | <b>5.08E-7</b>                                 | <b>0.00171</b>                           | <b>0.0243</b>                             | <b>59.5</b>                                |
| Process Emissions                                         | 0                                                    | 0                                | 0                              | 0                                    | 0                                                    | 1.40                                                      | 0                                       | 0                                              | 0                                        | 0.0000                                    | 0                                          |
| Catalyst                                                  | 5.84E-5                                              | 4.32E-10                         | 0.057                          | 3.69E-5                              | 0.011                                                | 0.011                                                     | 2.13E-9                                 | 1.32E-9                                        | 1.49E-5                                  | 0.0005                                    | 0.006                                      |
| Cooling Water                                             | 3.05E-5                                              | 1.58E-9                          | 0.115                          | 2.59E-5                              | 0.007                                                | 0.007                                                     | 3.31E-9                                 | 6.23E-10                                       | 9.31E-6                                  | 0.0004                                    | 38.4                                       |
| Process Water                                             | 2.37E-5                                              | 6.53E-10                         | 0.037                          | 1.75E-5                              | 0.004                                                | 0.004                                                     | 1.48E-9                                 | 1.67E-9                                        | 9.16E-6                                  | 0.0003                                    | 0.120                                      |
| DMF                                                       | 3.99E-5                                              | 2.75E-10                         | 0.046                          | 4.77E-5                              | 0.021                                                | 0.006                                                     | 1.77E-9                                 | 1.52E-9                                        | 7.14E-6                                  | 0.0003                                    | 0.004                                      |
| Sulfolane                                                 | 0.0001                                               | 2.32E-10                         | 0.027                          | 1.66E-5                              | 0.022                                                | 0.004                                                     | 1.05E-9                                 | 8.04E-10                                       | 1.20E-5                                  | 0.0002                                    | 0.008                                      |
| Natural Gas                                               | 0.0041                                               | 5.79E-9                          | 0.763                          | 0.0002                               | 2.38                                                 | 0.122                                                     | 2.90E-8                                 | 2.18E-7                                        | 0.0003                                   | 0.0068                                    | 0.008                                      |
| Infrastructure                                            | 3.19E-7                                              | 1.07E-11                         | 0.002                          | 4.45E-7                              | 2.71E-5                                              | 3.61E-5                                                   | 9.5E-11                                 | 2.59E-12                                       | 7.55E-8                                  | 2.44E-6                                   | 9.7E-6                                     |
| Steam                                                     | 0.0103                                               | 3.90E-8                          | 3.65                           | 0.0024                               | 5.03                                                 | 2.68                                                      | 1.62E-7                                 | 3.33E-7                                        | 0.0011                                   | 0.0787                                    | 0.140                                      |
| Plastic feedstock                                         | 0.0121                                               | 1.75E-7                          | 121                            | 3.20E-2                              | 4.99                                                 | 3.53                                                      | 2.03E-6                                 | 5.74E-7                                        | 0.00418                                  | 0.201                                     | 0.722                                      |
| Electricity                                               | 0.0023                                               | 4.90E-8                          | 5.59                           | 0.0051                               | 0.476                                                | 0.625                                                     | 1.67E-7                                 | 6.64E-8                                        | 0.0020                                   | 0.0160                                    | 0.104                                      |
| Refrigeration                                             | 0.0082                                               | 1.74E-7                          | 19.9                           | 0.0180                               | 1.69                                                 | 2.22                                                      | 5.94E-7                                 | 2.36E-7                                        | 0.0070                                   | 0.0569                                    | 0.369                                      |
| Solids Disposal                                           | 6.28E-6                                              | 6.47E-10                         | 3.16                           | 0.0002                               | 0.001                                                | 0.014                                                     | 4.23E-8                                 | 1.31E-10                                       | 9.87E-7                                  | 8.23E-5                                   | 0.000                                      |
| Wastewater                                                | 3.83E-6                                              | 1.31E-10                         | 0.010                          | 2.43E-5                              | 0.000                                                | 0.000                                                     | 2.33E-9                                 | 3.28E-11                                       | 7.32E-7                                  | 3.76E-5                                   | -0.031                                     |
| Aromatics (co-product)                                    | -0.0041                                              | -4.88E-8                         | -4.86                          | -0.0033                              | -3.97                                                | -1.05                                                     | -1.61E-7                                | -4.85E-8                                       | -0.0010                                  | -0.0487                                   | -0.636                                     |
| Naphtha (co-product)                                      | -0.0030                                              | -1.00E-8                         | -0.906                         | -0.0011                              | -4.56                                                | -0.285                                                    | -3.75E-8                                | -5.17E-7                                       | -0.0003                                  | -0.0250                                   | -0.147                                     |
| BTX (co-product)                                          | -0.0039                                              | -3.65E-8                         | -1.78                          | -0.0005                              | -7.49                                                | -1.35                                                     | -2.73E-8                                | -1.16E-8                                       | -0.0004                                  | -0.0537                                   | -1.052                                     |
| Propylene (co-product)                                    | -0.0047                                              | -2.98E-8                         | -1.64                          | -0.0003                              | -11.4                                                | -1.70                                                     | -1.45E-8                                | -6.11E-10                                      | -0.0004                                  | -0.0639                                   | -0.567                                     |
| Butene (co-product)                                       | -0.0023                                              | -1.71E-8                         | -0.979                         | -0.0002                              | -5.36                                                | -0.891                                                    | -1.06E-8                                | -2.61E-9                                       | -0.0002                                  | -0.0321                                   | -0.372                                     |
| <i>Fossil-based ethylene</i>                              |                                                      |                                  |                                |                                      |                                                      |                                                           |                                         |                                                |                                          |                                           |                                            |
| <b>TOTAL</b>                                              | <b>0.0195</b>                                        | <b>3.52E-8</b>                   | <b>4.70</b>                    | <b>0.0016</b>                        | <b>11.4</b>                                          | <b>1.32</b>                                               | <b>1.61E-7</b>                          | <b>1.20E-6</b>                                 | <b>0.016</b>                             | <b>0.049</b>                              | <b>0.198</b>                               |
| <b>Standard deviation</b>                                 | <b>4.16E-6</b>                                       | <b>1.64E-8</b>                   | <b>1.28</b>                    | <b>5.97E-5</b>                       | <b>0.00044</b>                                       | <b>0.0011</b>                                             | <b>3.49E-8</b>                          | <b>1.54E-10</b>                                | <b>6.02E-7</b>                           | <b>3.00E-5</b>                            | <b>2.81</b>                                |



## Materials and methods

**Feedstock Pretreatment.** The bales of mixed plastic feedstock are procured from a Materials Recovery Facility (MRF) where it is assumed to have gone through initial sorting, cleaning, removal of metals, etc. The size of the pyrolysis facility (240 TPD) is selected to be consistent with average size of local MRF's in the United States. For context, some of the largest MRFs in the U.S. have a plastic processing capacity of 500–600 TPD. In the U.S., fewer than 10% of MRFs (from a total of approximately 300 MRFs) have a processing capacity of over 500 TPD of plastics, while 66% of the MRFs have a throughput less than 300 TPD. Next, the mixed plastic bales are converted to flakes at an additional cost of \$0.42/kg at the pyrolysis facility.<sup>15</sup> The processing of feedstock in the base case design begins with size reduction of the mixed waste plastic flakes by two sequentially arranged hammer mills requiring a power input of 110 kWh/MT.<sup>15, 16</sup> The size of the feedstock is reduced up to 2–3 mm in diameter for maximizing heat transfer in the pyrolysis reactor associated with anisotropic properties of the feed. Any moisture in the feedstock is removed through a crossflow pellet dryer utilizing hot flue gases from the combustion reactor outlet. PVC decomposition in the pyrolysis reactor operation can lead to corrosion of process equipment, choking of downstream product separation trains, and release of environmental toxins.<sup>17</sup> Thus, it is removed by thermal degradation of the polymer at 300°C to release chlorine in the form of hydrochloric acid.<sup>17, 18</sup> The hot hydrochloric vapors are quenched with water and diluted to 30 wt% concentration before routing it to the wastewater treatment section. **Fig. 4** presents a simplified process flow diagram (PFD) for the base case, whereas detailed PFD indicating all model inputs and a full summary of stream compositions is provided in **Fig. S1**.

**Design and Operation of CFP Reactor.** An *in situ* system combines polymer deconstruction and catalytic upgrading of vapors within the same dual-stage, circulating, fluidized bed fast pyrolysis reactor systems. This has the potential to reduce capital costs by precluding the use of additional vapor phase upgrading reactors such as those in an *ex situ* configuration. The solids consisting of catalyst mixed with char and/or coke exit the riser reactor and are separated from the vapors in two cyclones connected in series (**Fig. S1**). The combustor also serves as a catalyst regenerator by burning off coke deposits. The combustor is operated at nearly the same pressure as the reactor. The reactor and combustor capital costs are scaled based on actual gas volumetric flow rate in our assessment. A fired heater is modelled to burn the process char and heavies, as well as some gaseous process intermediates in combustor, to provide sufficient heat to the *in situ* reactor. The hot stack gases generate high pressure steam (600 psig) in a boiler that in turn heats up the bed material, which is eventually fed into the *in situ* reactor. The temperature of combustor reactor is selected to be 720°C, based on constraints for operation of the ZSM-5 catalyst. The typical FCC replenishment rates are between 1% and 3% every day.<sup>12</sup> In this work, two percent of the catalyst inventory is replenished every day assuming an additional 1.6% of attrition rate. The catalyst is modeled as an olivine component in Aspen Plus and heated throughout the combustion process. A solids cooler is used in the combustor to partially cool the hot catalyst, allowing it to control the *in situ* reactor exit temperature of 670°C through the thermal capacity of the hot catalyst. Also, a steam stripper has been included in the reactor system to recover additional products (mainly coke deposits) from catalyst surface. Similar to Dutta *et al.*, a design specification of 1.36 kg of steam per 453.59 kg of catalyst was used.<sup>19, 20</sup> The cost of an additional vessel was added for this purpose and was sized assuming a height of 28 feet. Recycled light gases are used as the carrier gas for entraining the catalyst and mixed plastics feed. The reactor was modeled such that the bed is in a fluidized state and the pressure drop across the bed does not exceed 3 bar. The catalyst to plastic feed ratio of 6 and high process temperature (670°C) employed in the base case design results in increased yields of both olefins (34.9 wt%) and total aromatic compounds (32.7 wt%).

**Catalyst Selection for Catalytic Fast Pyrolysis with *in situ* Vapor Upgrading.** The *in situ* configuration combines fast pyrolysis and catalytic vapor upgrading within the same reactor. Spent FCC catalyst was

used in combination with a ZSM-5 catalyst in the proportion 62.5 wt% spent catalyst and 37.5 wt% of ZSM-5.<sup>7</sup> The spent FCC catalyst is modelled to be obtained from an operating refinery, with 0.23 wt% residual coke on its surface and a commercial ZSM-5 was modeled. The spent catalyst helps in maintaining the catalyst activity at a constant level without producing high levels of methane and coke.<sup>7</sup> For context, fresh FCC catalysts have a very high surface area (roughly 50% or more) compared to spent FCC catalysts and, as a result, a high activity. High catalyst activity increases feed cracking, resulting in higher yields of coke or light gases such as methane, which is avoided in this study. The price of spent FCC catalyst (62.5 wt%) and ZSM-5 zeolite (37.5 wt%) used in this study was estimated to be \$2.98 per kg using the CatCost tool.<sup>14</sup> Details on the catalyst cost estimation can be found in **Table S27**. A detailed PFD and a full summary of stream compositions are provided in **Fig. S1**.

**Phase Separation and Products Recovery.** The hot pyrolysis vapor effluent is routed to a three-stage quenching/condensation that lowers the temperature of hot vapor from 670°C to 25°C. Heat integration was employed to supply energy to the dechlorination reactor in the Feedstock Pretreatment section by utilizing the heat dissipated from cooling the hot vapors (670°C) in the Phase Separation section. Next, a flash vessel at 21°C separates a light gaseous stream (47 wt%) from the residual heavier liquid bottom (50 wt%). The yield of liquid product boiling at <220°C is 43.5 wt% and contains approximately 76 wt% aromatic compounds. The gaseous products, rich in olefinic gases, are sent to the olefins recovery process section for monomers (olefins) separation and the liquid from the bottoms is sent to the aromatic hydrocarbons recovery process section for the extraction and purification of aromatic products. Due to the specific catalytic activity of the spent FCC and ZSM-5 catalysts employed in this design, formation of methane and coke, as well as the formation of heavy liquid products (bp >370°C) is greatly suppressed. The process heavies are routed to the combustor of the CFP reactor system, where they are utilized as a fuel to heat the reactor. A portion of the non-condensable gases are recycled for use as fluidizing gas in the fast pyrolysis reactor. A detailed PFD and a full summary of stream compositions are provided in **Figure. S2**.

**Olefin Separation and Recovery.** Olefins recovery from the gaseous stream is modelled in three parts. *1) Upstream CO<sub>2</sub> removal:* The pyrolysis gaseous effluent may contain CO<sub>2</sub> and H<sub>2</sub>S, depending on the cracking feedstock, thus an acid-gas removal step that eliminates all CO<sub>2</sub> and/or H<sub>2</sub>S from the cracked gas is incorporated in the front-end section to remove CO<sub>2</sub> by absorption in a solvent upstream or before the gas enters the chilling train. The removal of CO<sub>2</sub> is important both from a fuel value standpoint (increasing heating value) and protection against downstream corrosion due to its acidic nature. There is a risk of CO<sub>2</sub>-freeze at low temperature condition and may be damaging for the heat exchanger and fractionation equipment.<sup>21</sup> Additionally, CO<sub>2</sub> can be absorbed into ethylene, affecting product quality and further processing.<sup>22</sup> Thus, CO<sub>2</sub> was removed (below 0.2 ppm) by a rate-based model in Aspen Plus using monoethanolamine (MEA) as a solvent. A packed column was utilized for CO<sub>2</sub> absorption using a 30 wt% MEA solution, and the CO<sub>2</sub> was removed from the top of a desorber column while the lean solvent was recycled. A detailed PFD and a full summary of stream compositions are provided in **Fig. S3**.

*2) Chilling train:* The chilling train configuration was modelled after standard industrial separation processes in ethylene and propylene plants.<sup>22</sup> The remainder of the light stream after CO<sub>2</sub> removal is pressurized to up to 37 bar (from 5 bar) and simultaneously cooled to 50°C by a system of five-stage compressors. During compression, the temperature of olefin-rich gaseous stream is maintained under 100°C by interstage cooling to prevent olefin polymerization and subsequent equipment fouling. Sequentially, the olefinic gases are further cooled and pre-separated in a series of cold boxes essentially comprising refrigeration coolers (Chiller-1 to Chiller-5), an expander (EXP), and knock out (KO) drums as shown in **Fig. S3**. Streams in the chilling train are cooled and reheated counter-currently throughout in plate-fin heat exchangers, which are also known as brazed aluminum heat exchangers (BAHX). Multiple, well-insulated

BAHX units are combined in a cold box, which sometimes also includes vessels or KO drums with a minimum temperature approach (MITA) of 3°C. Similar to an olefins plant, there are multiple liquid demethanizer feed streams (streams containing methane) coming out of the chilling train, at different temperatures and with different compositions, and they are fed to different locations in the demethanizer.<sup>23</sup>

**3) Downstream separation:** Methane (1.5 wt%) and hydrogen (0.1 wt%) are removed from the top of demethanizer in the liquid phase. Note that the demethanizer is the coldest point in the separation train. Literature data from olefins plants served as the basis to set the separation sequence of the refinery.<sup>23</sup> Ethylene and propylene, or propane, are often used as refrigerants in older olefin plants. Newer plants often have binary or even tertiary refrigeration systems and sometimes also employ turbo-expanders. Separation of the C<sub>1</sub> to C<sub>4</sub> gases at low temperatures requires the use of refrigeration cycles as well as high pressure steam. Therefore, the designed refrigeration cycles are integrated to maintain low-temperature conditions, as well as to reduce the overall cooling utilities. Finally, the bottom product of the demethanizer is nearly methane-free and is introduced into a deethanizer column. The gas product (top) from the deethanizer is fed into a C<sub>2</sub> splitter for the separation of ethylene from ethane. The bottom product is fed to the depropanizer. The overhead product of the depropanizer is sent to a C<sub>3</sub> fractionator that requires 140 trays in the distillation column. Polymer-grade (>99.5% purity) ethylene and propylene are obtained from the top of columns C<sub>2</sub> and C<sub>3</sub> fractionators, respectively, whereas ethane and propane are recovered from the bottom of these columns. Lastly, a debutanizer is used to separate the bottom product received from the depropanizer into a C<sub>4</sub> mixture (butene = >75% and butane = >23%) and C<sub>5+</sub> (**Fig. S3**).

**Separation of 1-butene and 1,3-butadiene from Butane.** Butane and butene are usually obtained by fractionating cuts comprising C<sub>4</sub>- hydrocarbons from steam or naphtha crackers. Since the boiling points of butane (-1°C) and butene (-6.3°C) are very close, they form a minimum boiling azeotrope mixture, which is difficult to separate by normal distillation processes. Therefore, a third component – a separating agent, most commonly a polar solvent, is employed to alter the relative volatilities of the components to be separated. On an industrial scale, extractive distillations with polar solvents are usually carried out. For example, a patent describes the separation of a C<sub>4</sub> cut freed of butadiene by extractive distillation with N-methylpyrrolidone (NMP)<sup>24</sup> and another discloses the use of dimethylformamide (DMF) as a polar extractant for butene/butane separation.<sup>25</sup> Likewise, other solvents such as acetonitrile, furfural, N-formylmorpholine, or dimethylacetamide have been used either anhydrously or in a mixture with water.<sup>24</sup>

Since recovering high-value products, especially 1-butene, is currently more profitable, an extractive distillation step was included to separate the C<sub>4</sub> mixture containing butane, 1-butene, and butadiene. DMF as a solvent was introduced from the top (6<sup>th</sup> stage) to flow counter-currently to the flow of feed (fed from stage 41). Due to the difference in boiling points of the polar extractant and the lower boiling aliphatic C<sub>4</sub> hydrocarbon, the butane is recovered from the top of the first column after the gaseous C<sub>4</sub> feed contacts the polar extractant with a mass ratio of 5.2:1. The top product, which is nearly 99% pure butane, is recovered, and the bottom product consisting of the butene/solvent mixture is introduced into a solvent recovery column. A reflux ratio of 1 enables complete separation of butene and butadiene as a low boiler fraction. Polymer-grade 1-butene is recovered from the top nearly free of the extractant, and the solvent recovered from the bottom is recycled back to the extractive distillation (ED) column (**Fig. S3**). The C<sub>5+</sub> consisting mostly of naphtha components is sent to aromatics recovery process section and finally for the recovery of pyrolysis naphtha.

**Aromatics Separation and Recovery.** The main purpose of aromatic hydrocarbons recovery process section is the extraction of BTX aromatic hydrocarbons in a mixture that might be supplied directly to a benzene-toluene-xylenes (BTX) facilities or sold separately. The conceptual design of the extraction process is based on the sulfolane process designed by UoP Honeywell,<sup>26</sup> which has been adapted to the feed

composition estimated for the plastics CFP refinery studied here. The outstanding properties of sulfolane including selectivity to aromatics, miscibility in water, stability and a high boiling point make this solvent, the chosen solvent for the extractive distillation process. The aromatics containing streams coming from the Phase Separation and Olefins Recovery sections are mixed, and then pressurized and heated to 3.53 bar and 170°C.

The mixed feed is introduced from the bottom of the ED column and sulfolane is introduced at the top. The sulfolane removes around 66% of C<sub>6</sub>–C<sub>12</sub> aromatic hydrocarbons using a solvent-to-feed ratio of 2 (mass basis).<sup>27</sup> Both the solvent and the feed are supplied at 170°C to improve the extraction. The distillate, rich in aliphatic hydrocarbons, is similar to naphtha. The bottoms, primarily containing aromatic compounds and sulfolane, are cooled down to 70°C and fed to a water wash column to remove aliphatic hydrocarbons with a carbon number greater than 12. Note that combining solvent with the feed alters the relative volatilities of the components in the feed because of the non-ideal behavior of the mixture, which is the key to the ED process. This extractor uses water at 90°C as a solvent, with a solvent-to-feed ratio of 0.06,<sup>28</sup> which clears almost 95% of heavy aliphatic hydrocarbons. The raffinate, which is rich in heavier hydrocarbons and containing some (<0.2%) solvent, is sent to the wastewater treatment. The extract is processed in a solvent recovery column (solvent stripper column). In this column, aromatic hydrocarbons are separated from the solvent under low vacuum (0.733 bar). Water is collected in the extract receiver boot and is directed to the water stripper. A detailed PFD and a full summary of stream compositions are provided in **Fig. S4**.

The distillate consists of a mixture of aromatics, traces of aliphatic hydrocarbons, and water, while the bottoms contain sulfolane (at 98.3% purity), which is recycled to the extractive distillation column. A two-phase separator reduces the water content of the distillate to yield a product with an aromatic content of 84%. Water from the bottoms of the separator is recycled to the wash column. The process requires make-up streams of sulfolane and water to maintain a constant solvent-to-feed ratio at the extractive distillation and wash columns, respectively. Finally, the BTX aromatic hydrocarbons are recovered from other aromatics (C<sub>9</sub>–C<sub>12</sub>) in a distillation column, and rest of the stream is recovered as a naphtha product.

**Heat Integration.** Heat integration was conducted for major process heating and cooling operations, such as heating of the dechlorination reactor and pyrolysis reactor, low-temperature cooling of gaseous olefin streams requiring refrigerants, and solvent recovery preheating. Specifically, heat leak into cold streams was considered a factor in the utilities operating expenses as it increases refrigeration requirements. Thus, heat leak for each BAHX was specified as percentage of duty.

**Impact of Crude Oil Prices on the Economic Viability of Plastics Pyrolysis.** Data from the Oil Price Information Service (OPIS) International Feedstocks Intelligence Reports for WTI (one of the crude oils used as a benchmark in oil pricing) range from \$30–\$120/bbl, and the prices of the specific year (15 years) served as the basis for the analysis product pricing structure. To capture the product pricing basis comprehensively, additional sources were included, mainly comprising S&P Global PLATTS, US Energy Information Administration (EIA) and IHS Markit.<sup>1, 10</sup>

**Property Methods and Property Estimation.** Aspen Plus V10 was used for process modeling. Given the non-ideality of the components used in the simulation, the Poly-SRK property method was chosen for all CFP area unit operations. For olefins separation, the NRTL-RK property method was used, whereas UNIQUAC was specifically used for the extractive distillation column employed for the recovery of the aromatics fraction.

All pure component thermodynamic and physical properties were estimated using the National Institute of Science and Technology ThermoDataEngine (NIST-TDE) capabilities built into the Aspen Plus software

package. Binary interaction parameters were estimated using UNIFAC and fit to the NRTL-RK property method. The molecular weight of polymers was calculated based on the number of repeat units of each monomer comprising the polymer followed by the addition of repeat and end units.

**Process Economics.** Economic assumptions were consistent with other recent TEA modeling work,<sup>12, 15, 29</sup> including cost year basis (2016), tax rate (21%), onstream time (90%), and plant startup time (0.5 years). For each process simulation, material, and energy flows calculated by the Aspen Plus process model were imported into an Excel spreadsheet, accounting for capital and operational costs. Given multiple products in the waste plastic processing facility, the selling price of BTX aromatic mixture was \$1.07 per kg based on the co-products revenues as determined using a DCFROR analysis to achieve a net present value (NPV) of zero assuming an after-tax rate of return of 10% over the 30-year lifespan of the refinery.

**Capital Costs.** All CFP area capital equipment base costs, scaling exponents, and installation factors were identical to that of the Dutta *et al.* report adjusted to a 2016 cost index.<sup>12</sup> In the olefins recovery and aromatics recovery section, the costs of pumps, compressors, distillation columns, and flash drums were calculated from the Aspen Capital Cost Evaluator (ACCE) V10 using flowrates and operating conditions imported from the results of the Aspen Plus simulation and standard refinery operating conditions<sup>22, 26</sup> with default costing assumptions and a 2016 cost year.

While software and empirical correlations exist for sizing and costing standard equipment such as pumps, compressors, distillation columns, and common reactor types, novel reactor types typically lack these costing tools. To develop capital cost estimates for the CFP reactor, we used information provided by the Harris Group Inc., originally provided in Dutta *et al.*<sup>12</sup> These values were used as the cost basis in this work, with power law scaling using the actual volumetric flow rate. The reactor cost basis used from Dutta *et al.* was for biomass pyrolysis in an *in situ* reactor operating at 550°C temperature and 8 bar pressure.<sup>12</sup> All related TEA assumptions pertaining to installation factors, materials of construction, details of distillation columns e.g., number of plates, materials of construction, feed, and solvent introduction stages, operating and design pressures and temperatures etc. are included in **Table S7**.

**Operating Costs.** Variable operating costs for raw materials, wastes, utilities, and process byproducts were determined using flow rates from the Aspen Plus process simulation. While the economic analysis maintains a majority of cost assumptions used by Ward *et al.*,<sup>30</sup> several additions to downstream product separations were made to reflect actual refinery operations. Additional material costing assumptions, catalyst pricing methodology, and utilities calculation are summarized in **Table S4**, **Table S27**, and **Table S7**.

Catalyst cost estimates were generated using the CatCost tool assuming 455.5-ton order sizes (twice per year) and a 2016 cost basis (**Table S27**).<sup>14</sup> Estimated delivered cost for mixed plastic waste feedstock varies depending on the sorting, MRF location, and the tipping fee. We assume here a delivered cost of \$0.18 per kg for the bales based on a US national average of mixed plastic streams from RecyclingMarkets.net<sup>8</sup> and an additional \$0.42/kg for the flakes.

**Supply Chain Energy and GHG emissions.** Cradle-to-gate process inventories of the Case A – naphtha product, Case B – mixed product, Case C – aromatics-rich product, and Case D – olefins-rich product were adapted from the TEA models to be incorporated into the Materials Flows Through Industry (MFI) tool for supply chain analysis.<sup>31</sup>

**Life Cycle Assessment:** When available, United States-specific inventories from ecoinvent version 3.3 (allocation, cut-off by classification – unit) were utilized. If these data were unavailable, global inventories were used instead. ‘Allocation, cut-off by classification – unit’ refers to data in which recyclable products are available for use burden-free (i.e., no impacts associated with the original manufacture of those

products).<sup>32</sup> Fossil-based BTX was approximated by a mixture of xylene (66%), toluene (30%), benzene (2.1%), and cumene (1.1%). The C<sub>9</sub>–C<sub>12</sub> aromatic co-products were approximated by cumene. Data on the collection and sorting phases for HDPE and PP were obtained from the literature<sup>33</sup> and assumed to approximate inventories for a mixed plastic feedstock. The LCA was conducted with SimaPro 9.0 software using the TRACI 2.1 (US 2008) method;<sup>34</sup> water use was calculated by the AWARE method.<sup>35</sup> Solid waste (PVC and spent catalyst) was assumed to be landfilled. The system boundaries for MFI, LCA, and TEA are shown in Fig. S10. The uncertainties of background data were provided according to log-normal distributions in the ecoinvent database and Monte Carlo analysis was performed with 1,000 iterations to give standard deviation values.

**Method for estimating cost of catalyst using CatCost model.**

**Table S27.** Estimation of catalyst cost by CapEx & OpEx Factors method using the CatCost tool.<sup>14</sup>

| <b>CatCost v1.1.0 – 5 Outputs, CapEx &amp; OpEx Factors Method</b> |                       |                    |
|--------------------------------------------------------------------|-----------------------|--------------------|
| Estimate: ZSM-5 37.5% with spent FCC catalyst                      |                       |                    |
| <i>General Output Parameters</i>                                   |                       |                    |
| Unit Cost in Cents or Dollars (USD, \$)                            | Dollars               |                    |
| Annual, Monthly, Weekly, Daily Cost?                               | Annual                |                    |
| <i>Estimate Details</i>                                            |                       |                    |
| Basis Year                                                         | 2016                  |                    |
| Design Production, Annual                                          | 8.26E+07              | kg                 |
| Actual Production, Annual                                          | 8.26E+07              | kg                 |
| <i>CapEx &amp; OpEx Factors Outputs</i>                            |                       |                    |
| <u>Cost Item</u>                                                   | <u>Unit Cost</u>      | <u>Annual Cost</u> |
|                                                                    | <u>\$/kg catalyst</u> | <u>\$/year</u>     |
| <u>Capital Costs (10-year plant life)</u>                          |                       |                    |
| Fixed Capital Investment                                           | 0.3385                | 27,977,448         |
| Working Capital                                                    | 0.0544                | 4,496,933          |
| <b>Total Capital Investment</b>                                    | <b>0.3929</b>         | <b>32,474,381</b>  |
| <u>Operating Costs</u>                                             |                       |                    |
| Direct Operating Costs                                             |                       |                    |
| Raw Materials                                                      | 0.9736                | 80,465,962         |
| Process Utilities                                                  | 0.1503                | 12,423,225         |
| Labor, Supplies, Maintenance, Lab                                  | 0.3368                | 27,831,039         |
| Indirect Operating Costs                                           |                       |                    |
| Taxes, Insurance, Rent, Overhead                                   | 0.3181                | 26,290,936         |
| General Expenses                                                   |                       |                    |
| Admin, Dist., Mkting., R&D                                         | 0.3342                | 27,617,882         |
| <b>Total Operating Costs</b>                                       | <b>2.1130</b>         | <b>174,629,043</b> |
| <u>Selling Margin</u>                                              |                       |                    |
| Return on Capital Investment<br>(15%/yr of total capital invested) |                       |                    |
|                                                                    | 0.5894                | 48,711,572         |
| Flat Margin (disabled)                                             | -                     | -                  |
| <b>Total Margin</b>                                                | <b>0.5894</b>         | <b>48,711,572</b>  |
| <b>Catalyst Purchase Cost</b>                                      | <b>3.0954</b>         | <b>255,814,995</b> |
| <b>Spent Catalyst Value (SCV)</b>                                  | <b>0.1072</b>         | <b>8,859,475</b>   |
| <b>Net Catalyst Cost</b>                                           | <b>2.9882</b>         | <b>246,955,520</b> |

It was assumed that spent FCC catalyst is substituted for the clay binder normally used in the estimate for catalyst cost to make 25-50% ZSM-5. Therefore, rather than the \$0.11/kg for selling spent FCC catalyst to be used in cement applications, the price is assumed in the range of \$0.22–0.55/kg to account for the higher purity application.

## References

1. M. Talmadge, C. Kinchin, H. Li Chum, A. de Rezende Pinho, M. Bidy, M. B. B. de Almeida and L. Carlos Casavechia, *Fuel*, 2021, **293**, 119960.
2. A. Milbrandt, K. Coney, A. Badgett and G. T. Beckham, *Resour. Conserv. Recycl.*, 2022, **183**, 106363.
3. G. Jiang, J. Wang, S. M. Al-Salem and G. A. Leeke, *Energy Fuels*, 2020, **34**, 7397-7409.
4. A. Fivga and I. Dimitriou, *Energy*, 2018, **149**, 865-874.
5. R. Westerhout, M. Van Koningsbruggen, A. G. Van Der Ham, J. Kuipers and W. P. M. Van Swaaij, *Chem. Eng. Res. Des.*, 1998, **76**, 427-439.
6. J. Sahu, K. Mahalik, H. K. Nam, T. Y. Ling, T. S. Woon, M. S. bin Abdul Rahman, Y. Mohanty, N. Jayakumar and S. Jamuar, *Environ. Prog. Sustain. Energy*, 2014, **33**, 298-307.
7. A. M. Ward, A. J. M. Oprins and R. Narayanaswamy, US 2016/0362609 A1, 2016.
8. RecyclingMarkets.net, Secondary Materials Pricing, <https://www.recyclingmarkets.net/>.
9. SigmaAldrich, <https://www.sigmaaldrich.com/US/en/search/sulfolane?focus=products&page=1&perPage=30&sort=relevance&term=sulfolane&type=product>, 2021.
10. R. J. Chang and J. Lacson, Process Economics Tool - PEP Yearbook. IHS Markit).
11. W. D. Seider, J. D. Seader and D. R. Lewin, *Product & Process Design Principles: Synthesis, Analysis and Evaluation, (With CD)*, John Wiley & Sons, 2009.
12. A. Dutta, A. H. Sahir, E. Tan, D. Humbird, L. J. Snowden-Swan, P. A. Meyer, J. Ross, D. Sexton, R. Yap and J. Lukas, *Process Design and Economics for the Conversion of Lignocellulosic Biomass to Hydrocarbon Fuels: Thermochemical Research Pathways with In Situ and Ex Situ Upgrading of Fast Pyrolysis Vapors*, United States, 2015.
13. G. D. Ulrich and P. T. Vasudevan, *Chem. Eng.*, 2006, **113**, 66-69.
14. F. Baddour, K. Van Allsburg, N. Wunder, J. Yarbrough, M. Jankousky, K. Gruchalla, K. Potter, J. Schaidle, E. Tan, M. Talmadge, J. Hensley, S. Habas, L. Snowden-Swan, J. Frye, U. O. o. E. Efficiency and B. T. O. Renewable Energy *Journal*, 2019.
15. A. Singh, N. A. Rorrer, S. R. Nicholson, E. Erickson, J. S. DesVeaux, A. F. T. Avelino, P. Lamers, A. Bhatt, Y. Zhang, G. Avery, L. Tao, A. R. Pickford, A. C. Carpenter, J. E. McGeehan and G. T. Beckham, *Joule*, 2021, **5**, 2479-2503.
16. S. M. Alston and J. C. Arnold, *Environmental Science & Technology*, 2011, **45**, 9386-9392.
17. I. C. McNeill, L. Memetea and W. J. Cole, *Polym. Degrad. Stab.*, 1995, **49**, 181-191.
18. A. López, I. De Marco, B. Caballero, M. Laresgoiti and A. Adrados, *Fuel Process. Technol.*, 2011, **92**, 253-260.
19. E. C. Tan, M. Talmadge, A. Dutta, J. Hensley, J. Schaidle, M. Bidy, D. Humbird, L. J. Snowden-Swan, J. Ross and D. Sexton, *Process Design and Economics for the Conversion of Lignocellulosic Biomass to Hydrocarbons via Indirect Liquefaction. Thermochemical Research Pathway to High-Octane Gasoline Blendstock Through Methanol/Dimethyl Ether Intermediates*, National Renewable Energy Lab.(NREL), Golden, CO (United States), 2015.
20. R. Sadeghbeigi, *Fluid catalytic cracking handbook: An expert guide to the practical operation, design, and optimization of FCC units*, Butterworth-Heinemann, 2020.
21. D. Berstad, G. Skaugen, S. Roussanaly, R. Anantharaman, P. Nekså, K. Jordal, S. Trædal and T. Gundersen, *Energies*, 2022, **15**, 515.



22. H. Zimmermann and R. Walzl, in *Ullmann's Encyclopedia of Industrial Chemistry.*, 2009.
23. M. Yang and F. You, *Chemical Engineering Transactions*, 2017, **61**, 1561-1566.
24. L. Kerker and R. Malzkorn, US 2006/0096849 A1, 2006.
25. M. L. Cano, D. M. Hamilton Jr and T. B. Thomason, *US Patent*, 2008, **WO2005035469A1**.
26. A. Liu, in *Handbook of Petroleum Refining Processes*, ed. R. A. Meyers, McGraw-Hill Education, New York, 4th ed. edn., 2016.
27. X. Zhao and F. You, *AIChE Journal*, 2021, **67**.
28. U. R. Gracida-Alvarez, O. Winjobi, J. C. Sacramento-Rivero and D. R. Shonnard, *ACS Sustain. Chem. Eng.*, 2019, **7**, 18254-18266.
29. A. W. Bartling, M. L. Stone, R. J. Hanes, A. Bhatt, Y. Zhang, M. J. Bidy, R. Davis, J. S. Kruger, N. E. Thornburg, J. S. Luterbacher, R. Rinaldi, J. S. M. Samec, B. F. Sels, Y. Román-Leshkov and G. T. Beckham, *Energy Environ. Sci.*, 2021, **14**, 4147-4168.
30. A. M. Ward, A. J. M. Oprins and R. Narayanaswamy, *US Pat.*, 0362609, 2019.
31. S. R. Nicholson, *Analyzing Next-generation Supply Chains Using the Materials Flows Through Industry Tool*, National Renewable Energy Lab.(NREL), Golden, CO (United States), 2020.
32. G. Wernet, C. Bauer, B. Steubing, J. Reinhard, E. Moreno-Ruiz and B. Weidema, *Int. J. Life. Cycle. Assess.*, 2016, **21**, 1218-1230.
33. F. Associates, Life cycle impacts for postconsumer recycled resins: PET, HDPE, and PP. Overland Park, 2018. <https://plasticsrecycling.org/images/library/2018-APR-LCI-report.pdf> (accessed on Nov. 2021).
34. J. Bare, *Clean Technol. Environ. Policy*, 2011, **13**, 687-696.
35. AWARE, (Available Water REMaining) Mission and Goals - WULCA <https://wulca-waterlca.org/aware/>, (accessed 21 March 2022).
